# Supplementary material for: Synthesis of unsymmetrical diaryl oxindoles/isoquinolinediones using 2-phenoxy-1H-benzo[d]imidazole as an integrated diarylating reagent
Source: Royal Society of Chemistry journal article supplement (doi:10.1039/d3qo00502j), 2023-01-01
Supplement: d3qo00502j1.pdf [file d3qo00502j1.pdf]

## Supporting Information

### **Synthesis of Unsymmetrical Diaryl Oxindoles/Isoquinolinediones Using 2-Phenoxy-1H-benzo[d]imidazoles as Integrated Diarylating Reagent**

Guiqing Xu, Yue Wang, Kangli Liu, Yuqin Jiang, Xinying Zhang\*, Xuesen Fan\*

*Pingyuan Laboratory, Collaborative Innovation Center of Henan Province for Green Manufacturing of Fine Chemicals, Key Laboratory of Green Chemical Media and Reactions, Ministry of Education, School of Chemistry and Chemical Engineering, Henan Normal University, Xinxiang, Henan 453007, China*

*E-mail: xinyingzhang@htu.cn; xuesen.fan@htu.cn*

## Table of Contents

|             |                                                |         |
|-------------|------------------------------------------------|---------|
| <b>I</b>    | General experimental information               | S3-S3   |
| <b>II</b>   | Experimental procedures and spectroscopic data | S4-S23  |
| <b>III</b>  | Mechanism studies                              | S24-S26 |
| <b>IV</b>   | NMR spectra of <b>3aa-3am</b>                  | S27-S61 |
| <b>V</b>    | NMR spectra of <b>5aa-5ac</b>                  | S62-S71 |
| <b>VI</b>   | NMR spectra of <b>6</b> and <b>7</b>           | S72-S75 |
| <b>VII</b>  | X-ray crystal structure and data of <b>3na</b> | S76-S77 |
| <b>VIII</b> | X-ray crystal structure and data of <b>3ae</b> | S78-S79 |
| <b>IX</b>   | References                                     | S80-S80 |

## I. General experimental information

Commercial reagents were used without further purification. 2-Phenoxy-1*H*-benzo[*d*]imidazoles (**1**)<sup>[1]</sup>, diazooxindoles (**2**)<sup>[2]</sup>, diazo homophthalimides (**4**)<sup>[3]</sup> and [RhCp\*Cl<sub>2</sub>]<sub>2</sub><sup>[4]</sup> were prepared based on literature procedures. Melting points were recorded with a micro melting point apparatus and uncorrected. The <sup>1</sup>H NMR spectra were recorded at 400 MHz or 600 MHz. The <sup>13</sup>C NMR spectra were recorded at 100 MHz or 150 MHz. The <sup>19</sup>F NMR spectra were recorded at 376 MHz or 565 MHz. Chemical shifts were expressed in parts per million ( $\delta$ ), and were reported as s (singlet), d (doublet), t (triplet), dd (doublet of doublets), m (multiplet), br s (broad singlet), etc. The coupling constants *J* were given in Hz. High resolution mass spectra (HRMS) were obtained *via* ESI mode by using a MicrOTOF mass spectrometer. All reactions were monitored by thin layer chromatography (TLC) using silica gel plates (silica gel 60 F254 0.25 mm), and components were visualized by observation under UV light (254 and 365 nm).

## II. Experimental procedures and spectroscopic data

### 1. Typical procedure for the synthesis of 3aa and spectroscopic data of 3aa-3am

To a reaction tube equipped with a stir bar were added 2-phenoxy-1*H*-benzo[*d*]imidazole (**1a**, 42.1 mg, 0.2 mmol), TFE (2 mL), 3-diazo-1-methylindolin-2-one (**2a**, 52.0 mg, 0.3 mmol), [RhCp\*Cl<sub>2</sub>]<sub>2</sub> (3.1 mg, 0.005 mmol), AgNTf<sub>2</sub> (15.5 mg, 0.04 mmol) and NaOAc (24.0 mg, 0.3 mmol) with stirring. The mixture was stirred at 60 °C (oil bath) under air for 1 h. Upon completion, it was cooled to room temperature, filtered through a pad of celite and concentrated under reduced pressure. The residue was purified by silica gel column chromatography using petroleum ether/ethyl acetate (3:1) as eluent to afford **3aa** (61.1 mg, 86%).

**3ba-3am** were obtained in a similar manner.

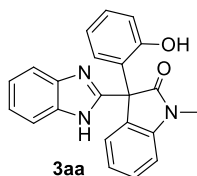

### 3-(1*H*-Benzo[*d*]imidazol-2-yl)-3-(2-hydroxyphenyl)-1-methylindolin-2-one (3aa)

Eluent: petroleum ether/ethyl acetate (3:1). White solid (61.1 mg, 86%), mp 253.3-254.8 °C. <sup>1</sup>H NMR (600 MHz, DMSO-*d*<sub>6</sub>): δ 12.16 (s, 1H), 9.68 (s, 1H), 7.56 (d, *J* = 7.8 Hz, 1H), 7.50 (d, *J* = 7.8 Hz, 1H), 7.34 (d, *J* = 7.8 Hz, 1H), 7.30 (t, *J* = 7.8 Hz, 1H), 7.17 (t, *J* = 7.8 Hz, 1H), 7.13-7.11 (m, 2H), 7.06-7.04 (m, 2H), 6.74-6.72 (m, 2H), 6.60 (d, *J* = 7.2 Hz, 1H), 3.22 (s, 3H). <sup>13</sup>C{<sup>1</sup>H} NMR (150 MHz, DMSO-*d*<sub>6</sub>): δ 175.9, 155.2, 151.2, 144.2, 142.7, 135.6, 130.9, 129.5, 129.4, 128.5, 127.3, 126.7, 122.7, 122.6, 121.6, 119.4, 119.2, 116.3, 112.4, 108.6, 57.5, 27.1. HRMS (ESI) *m/z*: [M+H]<sup>+</sup> Calcd for C<sub>22</sub>H<sub>18</sub>N<sub>3</sub>O<sub>2</sub> 356.1394; Found 356.1392.

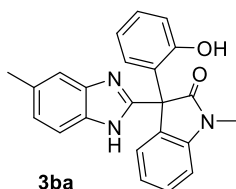

### 3-(2-Hydroxyphenyl)-1-methyl-3-(5-methyl-1*H*-benzo[*d*]imidazol-2-yl)indolin-2-one and 3-(2-hydroxyphenyl)-1-methyl-3-(6-methyl-1*H*-benzo[*d*]imidazol-2-yl)indolin-2-one (3ba)

Eluent: petroleum ether/ethyl acetate (3:1). White solid (55.1 mg, 75%, the ratio of two products: 0.6:0.4), mp 257.7-258.8 °C. <sup>1</sup>H NMR (600 MHz, DMSO-*d*<sub>6</sub>): δ 12.01 (s, 1H), 9.66 (s, 1H), 7.42 (d, *J* = 7.8 Hz, 0.6H), 7.38-7.35 (m, 0.8H), 7.32-7.28 (m, 2.6H), 7.11 (td, *J*<sub>1</sub> = 7.8 Hz, *J*<sub>2</sub> = 1.2 Hz, 1H), 7.05-7.03 (m, 2H), 7.00 (d,



$J = 8.4$  Hz, 0.4H), 6.94 (d,  $J = 8.4$  Hz, 0.6H), 6.73-6.70 (m, 2H), 6.57-6.56 (m, 1H), 3.22 (s, 3H), 2.39 (s, 1.8H), 2.37 (s, 1.2H).  $^{13}\text{C}\{^1\text{H}\}$  NMR (150 MHz, DMSO- $d_6$ ):  $\delta$  176.0, 155.2, 150.9, 150.5, 144.2, 143.1, 140.8, 135.9, 133.6, 132.0, 130.9, 130.4, 129.6, 129.4, 128.5, 127.5, 126.7, 124.1, 123.2, 122.5, 119.4, 118.9, 118.8, 116.3, 112.1, 111.9, 108.6, 57.4, 27.1, 21.85, 21.75. HRMS (ESI)  $m/z$ :  $[\text{M}+\text{H}]^+$  Calcd for  $\text{C}_{23}\text{H}_{20}\text{N}_3\text{O}_2$  370.1550; Found 370.1555.

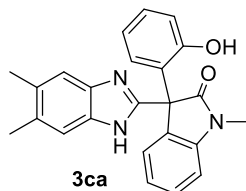

### 3-(5,6-Dimethyl-1H-benzo[d]imidazol-2-yl)-3-(2-hydroxyphenyl)-1-methylindolin-2-one (3ca)

Eluent: petroleum ether/ethyl acetate (3:1). White solid (58.2 mg, 76%), mp 296.6-297.5 °C.  $^1\text{H}$  NMR (400 MHz, DMSO- $d_6$ ):  $\delta$  11.91 (br s, 1H), 9.66 (s, 1H), 7.31-7.27 (m, 4H), 7.10 (t,  $J = 7.6$  Hz, 1H), 7.05-7.01 (m, 2H), 6.73-6.69 (m, 2H), 6.54 (d,  $J = 7.6$  Hz, 1H), 3.22 (s, 3H), 2.27 (s, 6H).  $^{13}\text{C}\{^1\text{H}\}$  NMR (150 MHz, DMSO- $d_6$ ):  $\delta$  176.1, 155.2, 150.0, 144.2, 141.3, 134.2, 131.3, 130.9, 129.9, 129.6, 129.3, 128.4, 127.6, 126.7, 122.5, 119.3, 119.2, 116.2, 112.3, 108.5, 57.4, 27.1, 20.5. HRMS (ESI)  $m/z$ :  $[\text{M}+\text{H}]^+$  Calcd for  $\text{C}_{24}\text{H}_{22}\text{N}_3\text{O}_2$  384.1707; Found 384.1705.

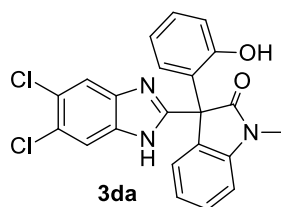

### 3-(5,6-Dichloro-1H-benzo[d]imidazol-2-yl)-3-(2-hydroxyphenyl)-1-methylindolin-2-one (3da)

Eluent: petroleum ether/ethyl acetate (3:1). White solid (51.8 mg, 61%), mp 241.2-242.9 °C.  $^1\text{H}$  NMR (400 MHz, DMSO- $d_6$ ):  $\delta$  12.48 (br s, 1H), 9.74 (s, 1H), 7.88 (br s, 1H), 7.69 (br s, 1H), 7.37 (d,  $J = 7.2$  Hz, 1H), 7.33 (t,  $J = 7.6$  Hz, 1H), 7.17-7.13 (m, 1H), 7.08-7.05 (m, 2H), 6.77-6.74 (m, 2H), 6.61 (d,  $J = 7.6$  Hz, 1H), 3.24 (s, 3H).  $^{13}\text{C}\{^1\text{H}\}$  NMR (100 MHz, DMSO- $d_6$ ):  $\delta$  175.4, 155.3, 154.2, 144.1, 142.3, 135.1, 130.5, 129.6, 129.3, 128.8, 126.9, 126.7, 125.2, 124.3, 122.8, 120.5, 119.5, 116.4, 113.5, 108.8, 57.5, 27.2. HRMS (ESI)  $m/z$ :  $[\text{M}+\text{H}]^+$  Calcd for  $\text{C}_{22}\text{H}_{16}\text{Cl}_2\text{N}_3\text{O}_2$  424.0614; Found 424.0604.

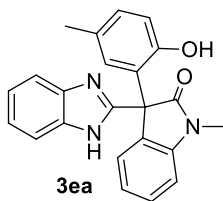

### 3-(1H-Benzo[d]imidazol-2-yl)-3-(2-hydroxy-5-methylphenyl)-1-methylindolin-2-one (3ea)

Eluent: petroleum ether/ethyl acetate (3:1). White solid (50.2 mg, 68%), mp 270.4-271.9 °C. <sup>1</sup>H NMR (600 MHz, DMSO-*d*<sub>6</sub>): δ 12.16 (br s, 1H), 9.44 (s, 1H), 7.55-7.51 (m, 2H), 7.39 (d, *J* = 7.2 Hz, 1H), 7.29 (t, *J* = 7.2 Hz, 1H), 7.16-7.13 (m, 2H), 7.06-7.03 (m, 2H), 6.93 (d, *J* = 7.8 Hz, 1H), 6.64 (d, *J* = 7.8 Hz, 1H), 6.47 (s, 1H), 3.22 (s, 3H), 2.08 (s, 3H). <sup>13</sup>C{<sup>1</sup>H} NMR (100 MHz, DMSO-*d*<sub>6</sub>): δ 175.9, 153.1, 151.4, 144.1, 142.7, 135.6, 131.1, 129.82, 129.80, 128.5, 127.8, 126.9, 126.7, 122.6, 121.6, 119.2, 116.3, 112.4, 108.6, 57.6, 27.1, 20.8. HRMS (ESI) *m/z*: [M+H]<sup>+</sup> Calcd for C<sub>23</sub>H<sub>20</sub>N<sub>3</sub>O<sub>2</sub> 370.1550; Found 370.1556.

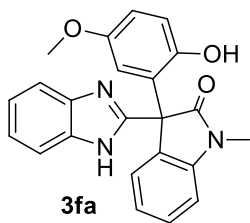

### 3-(1H-Benzo[d]imidazol-2-yl)-3-(2-hydroxy-5-methoxyphenyl)-1-methylindolin-2-one (3fa)

Eluent: petroleum ether/ethyl acetate (3:1). White solid (46.3 mg, 60%), mp 195.2-196.4 °C. <sup>1</sup>H NMR (600 MHz, DMSO-*d*<sub>6</sub>): δ 12.17 (br s, 1H), 9.21 (s, 1H), 7.56-7.50 (m, 2H), 7.39-7.38 (m, 1H), 7.31-7.30 (m, 1H), 7.17-7.14 (m, 2H), 7.06-7.05 (m, 2H), 6.75 (d, *J* = 7.2 Hz, 1H), 6.65 (d, *J* = 8.4 Hz, 1H), 6.17 (s, 1H), 3.54 (s, 3H), 3.22 (s, 3H). <sup>13</sup>C{<sup>1</sup>H} NMR (150 MHz, DMSO-*d*<sub>6</sub>): δ 175.7, 152.3, 151.1, 149.1, 144.2, 142.6, 135.6, 130.7, 128.6, 128.0, 126.7, 122.8, 122.6, 121.7, 119.2, 116.7, 116.4, 113.4, 112.3, 108.7, 57.5, 55.8, 27.1. HRMS (ESI) *m/z*: [M+H]<sup>+</sup> Calcd for C<sub>23</sub>H<sub>20</sub>N<sub>3</sub>O<sub>3</sub> 386.1499; Found 386.1497.

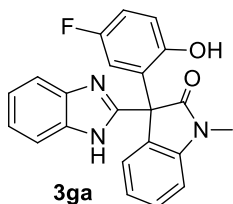

### 3-(1H-Benzo[d]imidazol-2-yl)-3-(5-fluoro-2-hydroxyphenyl)-1-methylindolin-2-one (3ga)

Eluent: petroleum ether/ethyl acetate (3:1). White solid (61.2 mg, 82%), mp 198.1-199.4 °C. <sup>1</sup>H NMR (600 MHz, DMSO-*d*<sub>6</sub>): δ 12.26 (br s, 1H), 9.75 (s, 1H), 7.59-7.53 (m, 2H), 7.42 (d, *J* = 6.6 Hz, 1H), 7.34-7.32 (m,

1H), 7.19-7.16 (m, 2H), 7.09-7.06 (m, 2H), 7.01 (td,  $J_1 = 8.4$  Hz,  $J_2 = 3.0$  Hz, 1H), 6.74 (dd,  $J_1 = 9.0$  Hz,  $J_2 = 4.8$  Hz, 1H), 6.41 (dd,  $J_1 = 10.2$  Hz,  $J_2 = 3.6$  Hz, 1H), 3.24 (s, 3H).  $^{13}\text{C}\{^1\text{H}\}$  NMR (100 MHz, DMSO- $d_6$ ):  $\delta$  175.3, 155.6 (d,  $^1J_{\text{C-F}} = 232.6$  Hz), 151.7, 150.7, 144.2, 142.7, 135.6, 130.4, 128.8, 128.4 (d,  $^3J_{\text{C-F}} = 7.0$  Hz), 126.6, 122.9, 122.8, 121.8, 119.3, 117.2 (d,  $^3J_{\text{C-F}} = 8.0$  Hz), 116.0 (d,  $^2J_{\text{C-F}} = 25.2$  Hz), 115.7 (d,  $^2J_{\text{C-F}} = 23.1$  Hz), 112.4, 108.8, 57.3, 27.1.  $^{19}\text{F}$  NMR (376 MHz, DMSO- $d_6$ ):  $\delta$  -125.41 – -125.47 (m). HRMS (ESI)  $m/z$ :  $[\text{M}+\text{H}]^+$  Calcd for  $\text{C}_{22}\text{H}_{17}\text{FN}_3\text{O}_2$  374.1299; Found 374.1295.

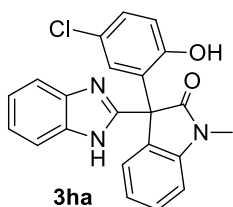

### 3-(1H-Benzo[d]imidazol-2-yl)-3-(5-chloro-2-hydroxyphenyl)-1-methylindolin-2-one (3ha)

Eluent: petroleum ether/ethyl acetate (3:1). White solid (58.5 mg, 75%), mp 246.2-247.6 °C.  $^1\text{H}$  NMR (600 MHz, DMSO- $d_6$ ):  $\delta$  12.27 (s, 1H), 10.09 (s, 1H), 7.60 (d,  $J = 7.8$  Hz, 1H), 7.53 (d,  $J = 7.2$  Hz, 1H), 7.44 (d,  $J = 7.2$  Hz, 1H), 7.34 (t,  $J = 7.8$  Hz, 1H), 7.23 (dd,  $J = 9.0$  Hz,  $J = 2.4$  Hz, 1H), 7.21-7.16 (m, 2H), 7.10-7.07 (m, 2H), 6.78 (d,  $J = 9.0$  Hz, 1H), 6.63 (d,  $J = 2.4$  Hz, 1H), 3.25 (s, 3H).  $^{13}\text{C}\{^1\text{H}\}$  NMR (100 MHz, DMSO- $d_6$ ):  $\delta$  175.2, 154.5, 150.6, 144.2, 142.7, 135.5, 130.3, 129.3, 129.1, 129.0, 128.8, 126.6, 122.9, 122.84, 122.79, 121.8, 119.3, 118.0, 112.4, 108.8, 57.3, 27.2. HRMS (ESI)  $m/z$ :  $[\text{M}+\text{H}]^+$  Calcd for  $\text{C}_{22}\text{H}_{17}\text{ClN}_3\text{O}_2$  390.1004; Found 390.1000.

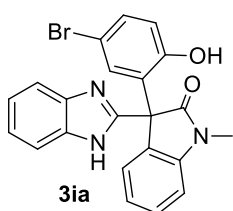

### 3-(1H-Benzo[d]imidazol-2-yl)-3-(5-bromo-2-hydroxyphenyl)-1-methylindolin-2-one (3ia)

Eluent: petroleum ether/ethyl acetate (3:1). White solid (69.5 mg, 80%), mp 286.9-287.6 °C.  $^1\text{H}$  NMR (600 MHz, DMSO- $d_6$ ):  $\delta$  12.25 (s, 1H), 10.10 (s, 1H), 7.58 (d,  $J = 7.8$  Hz, 1H), 7.52 (d,  $J = 7.8$  Hz, 1H), 7.43 (d,  $J = 7.2$  Hz, 1H), 7.34-7.31 (m, 2H), 7.19 (t,  $J = 7.2$  Hz, 1H), 7.14 (t,  $J = 7.2$  Hz, 1H), 7.08-7.06 (m, 2H), 6.74-6.71 (m, 2H), 3.23 (s, 3H).  $^{13}\text{C}\{^1\text{H}\}$  NMR (100 MHz, DMSO- $d_6$ ):  $\delta$  175.2, 154.9, 150.6, 144.2, 142.7, 135.5, 132.2, 131.8, 130.4, 129.6, 128.8, 126.6, 122.9, 122.8, 121.8, 119.3, 118.6, 112.4, 110.3, 108.8, 57.3, 27.2. HRMS (ESI)  $m/z$ :  $[\text{M}+\text{H}]^+$  Calcd for  $\text{C}_{22}\text{H}_{17}\text{BrN}_3\text{O}_2$  434.0499; Found 434.0503.

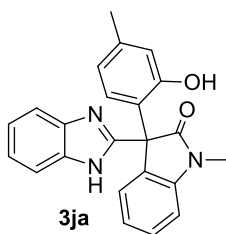

### 3-(1H-Benzo[d]imidazol-2-yl)-3-(2-hydroxy-4-methylphenyl)-1-methylindolin-2-one (3ja)

Eluent: petroleum ether/ethyl acetate (3:1). White solid (53.2 mg, 72%), mp 178.3-179.6 °C. <sup>1</sup>H NMR (600 MHz, DMSO-*d*<sub>6</sub>): δ 12.13 (s, 1H), 9.56 (s, 1H), 7.56 (d, *J* = 7.8 Hz, 1H), 7.50 (d, *J* = 7.8 Hz, 1H), 7.35 (d, *J* = 7.8 Hz, 1H), 7.29 (t, *J* = 7.8 Hz, 1H), 7.16 (t, *J* = 7.8 Hz, 1H), 7.12 (t, *J* = 7.8 Hz, 1H), 7.05-7.02 (m, 2H), 6.57-6.54 (m, 2H), 6.49 (d, *J* = 7.8 Hz, 1H), 3.22 (s, 3H), 2.17 (s, 3H). <sup>13</sup>C{<sup>1</sup>H} NMR (100 MHz, DMSO-*d*<sub>6</sub>): δ 176.0, 155.1, 151.4, 144.1, 142.7, 138.9, 135.6, 131.1, 129.4, 128.4, 126.7, 124.5, 122.7, 122.6, 121.6, 120.1, 119.2, 116.9, 112.4, 108.6, 57.3, 27.1, 21.1. HRMS (ESI) *m/z*: [M+H]<sup>+</sup> Calcd for C<sub>23</sub>H<sub>20</sub>N<sub>3</sub>O<sub>2</sub> 370.1550; Found 370.1551.

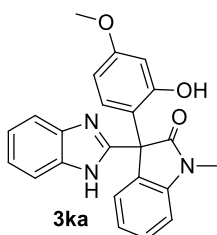

### 3-(1H-Benzo[d]imidazol-2-yl)-3-(2-hydroxy-4-methoxyphenyl)-1-methylindolin-2-one (3ka)

Eluent: petroleum ether/ethyl acetate (3:1). White solid (44.7 mg, 58%), mp 195.2-196.4 °C. <sup>1</sup>H NMR (400 MHz, DMSO-*d*<sub>6</sub>): δ 12.12 (br s, 1H), 9.71 (s, 1H), 7.52-7.50 (m, 2H), 7.34 (d, *J* = 7.2 Hz, 1H), 7.30 (t, *J* = 7.6 Hz, 1H), 7.14 (br s, 2H), 7.07-7.03 (m, 2H), 6.50 (d, *J* = 8.8 Hz, 1H), 6.34 (dd, *J* = 8.8 Hz, *J* = 2.4 Hz, 1H), 6.28 (d, *J* = 2.4 Hz, 1H), 3.65 (s, 3H), 3.22 (s, 3H). <sup>13</sup>C{<sup>1</sup>H} NMR (150 MHz, DMSO-*d*<sub>6</sub>): δ 176.1, 160.4, 156.3, 151.5, 144.0, 142.7, 135.6, 131.3, 130.1, 128.4, 126.6, 122.6, 121.6, 121.1, 119.8, 119.2, 118.9, 112.3, 108.6, 104.7, 102.3, 57.0, 55.5, 27.1. HRMS (ESI) *m/z*: [M+H]<sup>+</sup> Calcd for C<sub>23</sub>H<sub>20</sub>N<sub>3</sub>O<sub>3</sub> 386.1499; Found 386.1497.

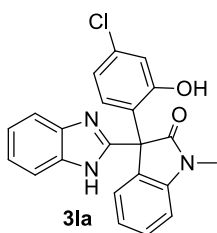

### 3-(1*H*-Benzo[*d*]imidazol-2-yl)-3-(4-chloro-2-hydroxyphenyl)-1-methylindolin-2-one (3la)

Eluent: petroleum ether/ethyl acetate (3:1). White solid (47.6 mg, 61%), mp 206.8-208.0 °C. <sup>1</sup>H NMR (600 MHz, DMSO-*d*<sub>6</sub>): δ 12.21 (br s, 1H), 10.28 (s, 1H), 7.56-7.51 (m, 2H), 7.36 (d, *J* = 7.2 Hz, 1H), 7.33-7.31 (m, 1H), 7.16-7.15 (m, 2H), 7.08-7.05 (m, 2H), 6.84 (dd, *J*<sub>1</sub> = 8.4 Hz, *J*<sub>2</sub> = 2.4 Hz, 1H), 6.76 (d, *J* = 2.4 Hz, 1H), 6.64 (d, *J* = 8.4 Hz, 1H), 3.23 (s, 3H). <sup>13</sup>C{<sup>1</sup>H} NMR (100 MHz, DMSO-*d*<sub>6</sub>): δ 175.4, 156.3, 150.8, 144.2, 142.7, 135.6, 133.4, 131.0, 130.5, 128.7, 126.61, 126.58, 122.9, 122.8, 121.7, 119.33, 119.26, 116.0, 112.4, 108.8, 57.1, 27.1. HRMS (ESI) *m/z*: [M+H]<sup>+</sup> Calcd for C<sub>22</sub>H<sub>17</sub>ClN<sub>3</sub>O<sub>2</sub> 390.1004; Found 390.1002.

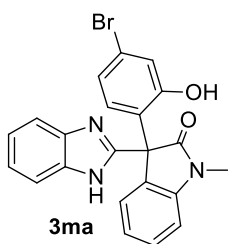

### 3-(1*H*-Benzo[*d*]imidazol-2-yl)-3-(4-bromo-2-hydroxyphenyl)-1-methylindolin-2-one (3ma)

Eluent: petroleum ether/ethyl acetate (3:1). White solid (49.5 mg, 57%), mp 202.8-203.6 °C. <sup>1</sup>H NMR (600 MHz, DMSO-*d*<sub>6</sub>): δ 12.19 (br s, 1H), 10.25 (s, 1H), 7.55 (d, *J* = 7.8 Hz, 1H), 7.49 (d, *J* = 7.8 Hz, 1H), 7.35-7.31 (m, 2H), 7.18-7.12 (m, 2H), 7.08-7.05 (m, 2H), 6.96 (dd, *J*<sub>1</sub> = 8.4 Hz, *J*<sub>2</sub> = 1.8 Hz, 1H), 6.88 (d, *J* = 1.8 Hz, 1H), 6.56 (d, *J* = 8.4 Hz, 1H), 3.23 (s, 3H). <sup>13</sup>C{<sup>1</sup>H} NMR (100 MHz, DMSO-*d*<sub>6</sub>): δ 175.4, 156.4, 150.7, 144.2, 142.7, 135.6, 132.5, 131.3, 130.4, 128.7, 127.0, 126.6, 122.8, 122.7, 122.2, 121.7, 119.3, 118.8, 112.4, 108.8, 57.1, 27.1. HRMS (ESI) *m/z*: [M+H]<sup>+</sup> Calcd for C<sub>22</sub>H<sub>17</sub>BrN<sub>3</sub>O<sub>2</sub> 434.0499; Found 434.0490.

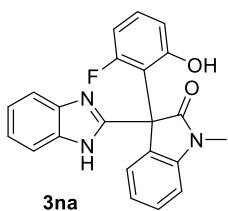

### 3-(1*H*-Benzo[*d*]imidazol-2-yl)-3-(2-fluoro-6-hydroxyphenyl)-1-methylindolin-2-one (3na)

Eluent: petroleum ether/ethyl acetate (3:1). White solid (46.3 mg, 62%), mp 274.5-276.3 °C. <sup>1</sup>H NMR (400 MHz, DMSO-*d*<sub>6</sub>): δ 12.33 (br s, 1H), 10.23 (s, 1H), 7.44 (br s, 2H), 7.35-7.31 (m, 2H), 7.18-7.03 (m, 5H), 6.63-6.58 (m, 2H), 3.16 (s, 3H). <sup>13</sup>C{<sup>1</sup>H} NMR (150 MHz, DMSO-*d*<sub>6</sub>): δ 174.7, 162.0 (d, <sup>1</sup>*J*<sub>C-F</sub> = 244.2 Hz), 157.5, 152.2, 144.1, 142.7, 136.0, 130.5, 129.9 (d, <sup>3</sup>*J*<sub>C-F</sub> = 11.6 Hz), 128.9, 126.3, 122.9, 122.3, 121.2, 119.0 (d, <sup>3</sup>*J*<sub>C-F</sub> = 8.7 Hz), 114.4 (d, <sup>2</sup>*J*<sub>C-F</sub> = 13.1 Hz), 112.7, 111.8, 108.9, 107.2 (d, <sup>2</sup>*J*<sub>C-F</sub> = 24.8 Hz), 54.4, 27.1. <sup>19</sup>F

NMR (376 MHz, DMSO-*d*<sub>6</sub>):  $\delta$  -110.30 (dd,  $J_1 = 11.7$  Hz,  $J_2 = 6.4$  Hz). HRMS (ESI)  $m/z$ :  $[M+H]^+$  Calcd for C<sub>23</sub>H<sub>20</sub>N<sub>3</sub>O<sub>3</sub> 374.1299; Found 374.1308.

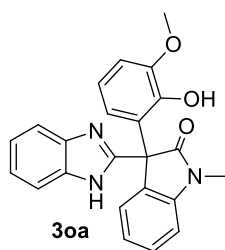

### 3-(1*H*-Benzo[*d*]imidazol-2-yl)-3-(2-hydroxy-3-methoxyphenyl)-1-methylindolin-2-one (3oa)

Eluent: petroleum ether/ethyl acetate (3:1). White solid (45.5 mg, 59%), mp 195.3-196.6 °C. <sup>1</sup>H NMR (400 MHz, DMSO-*d*<sub>6</sub>):  $\delta$  12.15 (br s, 1H), 8.88 (s, 1H), 7.52 (br s, 2H), 7.37 (d,  $J = 7.6$  Hz, 1H), 7.30 (t,  $J = 7.6$  Hz, 1H), 7.15 (br s, 2H), 7.07-7.04 (m, 2H), 6.91 (d,  $J = 8.0$  Hz, 1H), 6.70 (t,  $J = 8.0$  Hz, 1H), 6.23 (d,  $J = 7.6$  Hz, 1H), 3.71 (s, 3H), 3.22 (s, 3H). <sup>13</sup>C{<sup>1</sup>H} NMR (100 MHz, DMSO-*d*<sub>6</sub>):  $\delta$  175.7, 151.4, 148.3, 144.6, 144.1, 142.7, 135.6, 131.0, 128.6, 127.2, 126.7, 122.6, 121.7, 121.6, 121.2, 119.5, 119.1, 112.3, 112.0, 108.7, 57.5, 56.4, 27.1. HRMS (ESI)  $m/z$ :  $[M+H]^+$  Calcd for C<sub>23</sub>H<sub>20</sub>N<sub>3</sub>O<sub>3</sub> 386.1499; Found 386.1497.

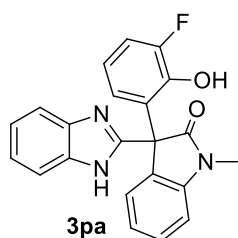

### 3-(1*H*-Benzo[*d*]imidazol-2-yl)-3-(3-fluoro-2-hydroxyphenyl)-1-methylindolin-2-one (3pa)

Eluent: petroleum ether/ethyl acetate (3:1). White solid (53.8 mg, 72%), mp 174.2-175.7 °C. <sup>1</sup>H NMR (400 MHz, DMSO-*d*<sub>6</sub>):  $\delta$  12.23 (br s, 1H), 9.97 (s, 1H), 7.54 (br s, 2H), 7.37 (d,  $J = 7.2$  Hz, 1H), 7.35-7.31 (m, 1H), 7.16-7.06 (m, 5H), 6.79-6.74 (m, 1H), 6.47 (d,  $J = 8.0$  Hz, 1H), 3.25 (s, 3H). <sup>13</sup>C{<sup>1</sup>H} NMR (100 MHz, DMSO-*d*<sub>6</sub>):  $\delta$  175.4, 152.2 (d, <sup>1</sup> $J_{C-F} = 237.0$  Hz), 150.1, 144.0, 143.0 (d, <sup>2</sup> $J_{C-F} = 16.4$  Hz), 142.6, 135.5, 130.5, 130.3 (d, <sup>4</sup> $J_{C-F} = 1.9$  Hz), 128.8, 126.6, 125.0, 122.8, 121.6, 119.5 (d, <sup>3</sup> $J_{C-F} = 6.9$  Hz), 119.3, 118.4, 115.9 (d, <sup>2</sup> $J_{C-F} = 17.9$  Hz), 112.3, 108.9, 57.5 (d, <sup>4</sup> $J_{C-F} = 3.2$  Hz), 27.2. <sup>19</sup>F NMR (376 MHz, DMSO-*d*<sub>6</sub>):  $\delta$  -135.30 - -135.34 (m). HRMS (ESI)  $m/z$ :  $[M+H]^+$  Calcd for C<sub>22</sub>H<sub>17</sub>FN<sub>3</sub>O<sub>2</sub> 374.1299; Found 374.1297.

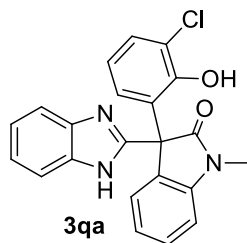

**3-(1H-Benzo[d]imidazol-2-yl)-3-(3-chloro-2-hydroxyphenyl)-1-methylindolin-2-one (3qa)**

Eluent: petroleum ether/ethyl acetate (3:1). White solid (56.9 mg, 73%), mp 267.4-268.7 °C. <sup>1</sup>H NMR (400 MHz, DMSO-*d*<sub>6</sub>): δ 12.24 (br s, 1H), 9.81 (br s, 1H), 7.54 (br s, 2H), 7.38-7.32 (m, 3H), 7.16-7.06 (m, 4H), 6.82 (t, *J* = 8.0 Hz, 1H), 6.63 (d, *J* = 8.0 Hz, 1H), 3.26 (s, 3H). <sup>13</sup>C{<sup>1</sup>H} NMR (100 MHz, DMSO-*d*<sub>6</sub>): δ 175.7, 151.1, 151.0, 144.0, 142.7, 135.6, 130.3, 130.1, 129.9, 128.9, 128.5, 126.6, 122.9, 122.7, 122.0, 121.7, 120.9, 119.2, 112.4, 109.1, 57.9, 27.2. HRMS (ESI) *m/z*: [M+H]<sup>+</sup> Calcd for C<sub>22</sub>H<sub>17</sub>ClN<sub>3</sub>O<sub>2</sub> 390.1004; Found 390.1002.

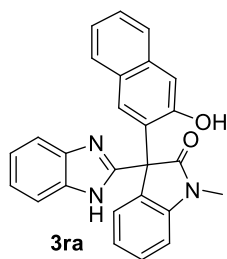

**3-(1H-Benzo[d]imidazol-2-yl)-3-(3-hydroxynaphthalen-2-yl)-1-methylindolin-2-one (3ra)**

Eluent: petroleum ether/ethyl acetate (3:1). White solid (43.0 mg, 53%), mp 250.0-251.8 °C. <sup>1</sup>H NMR (600 MHz, DMSO-*d*<sub>6</sub>): δ 12.30 (br s, 1H), 10.11 (s, 1H), 7.67 (d, *J* = 8.4 Hz, 1H), 7.63 (d, *J* = 7.8 Hz, 1H), 7.58-7.55 (m, 2H), 7.43-7.38 (m, 2H), 7.34 (t, *J* = 7.8 Hz, 1H), 7.28 (s, 1H), 7.24-7.20 (m, 3H), 7.11-7.05 (m, 3H), 3.29 (s, 3H). <sup>13</sup>C{<sup>1</sup>H} NMR (150 MHz, DMSO-*d*<sub>6</sub>): δ 175.8, 153.6, 151.2, 144.3, 142.8, 135.7, 134.5, 130.9, 130.1, 129.2, 128.7, 128.2, 127.7, 127.0, 126.6, 125.8, 123.7, 122.8, 122.7, 121.7, 119.3, 112.4, 110.2, 108.8, 58.1, 27.2. HRMS (ESI) *m/z*: [M+H]<sup>+</sup> Calcd for C<sub>26</sub>H<sub>20</sub>N<sub>3</sub>O<sub>2</sub> 406.1550; Found 406.1552.

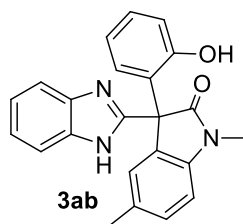

**3-(1H-Benzo[d]imidazol-2-yl)-3-(2-hydroxyphenyl)-1,5-dimethylindolin-2-one (3ab)**

Eluent: petroleum ether/ethyl acetate (3:1). White solid (45.8 mg, 62%), mp > 300 °C. <sup>1</sup>H NMR (600 MHz, DMSO-*d*<sub>6</sub>): δ 12.12 (br s, 1H), 9.66 (s, 1H), 7.57 (d, *J* = 7.8 Hz, 1H), 7.50 (d, *J* = 7.2 Hz, 1H), 7.17-7.10 (m, 5H), 6.94 (d, *J* = 7.8 Hz, 1H), 6.74-6.72 (m, 2H), 6.60 (d, *J* = 7.2 Hz, 1H), 3.20 (s, 3H), 2.27 (s, 3H). <sup>13</sup>C{<sup>1</sup>H} NMR (100 MHz, DMSO-*d*<sub>6</sub>): δ 175.9, 155.2, 151.3, 142.7, 141.9, 135.6, 131.4, 130.9, 129.6, 129.4, 128.8, 127.5, 127.2, 122.7, 121.6, 119.4, 119.2, 116.4, 112.4, 108.4, 57.6, 27.1, 21.3. HRMS (ESI) *m/z*: [M+H]<sup>+</sup> Calcd for C<sub>23</sub>H<sub>20</sub>N<sub>3</sub>O<sub>2</sub> 370.1550; Found 370.1551.

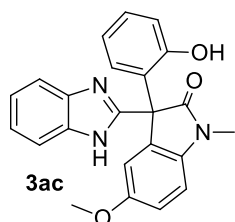

### 3-(1*H*-Benzo[*d*]imidazol-2-yl)-3-(2-hydroxyphenyl)-5-methoxy-1-methylindolin-2-one (3ac)

Eluent: petroleum ether/ethyl acetate (3:1). White solid (43.9 mg, 57%), mp 298.7-299.9 °C. <sup>1</sup>H NMR (400 MHz, DMSO-*d*<sub>6</sub>): δ 12.16 (br s, 1H), 9.68 (s, 1H), 7.57-7.50 (m, 2H), 7.15-7.12 (m, 3H), 6.98-6.96 (m, 2H), 6.89 (d, *J* = 8.4 Hz, 1H), 6.75-6.74 (m, 2H), 6.63 (d, *J* = 7.2 Hz, 1H), 3.69 (s, 3H), 3.20 (s, 3H). <sup>13</sup>C{<sup>1</sup>H} NMR (100 MHz, DMSO-*d*<sub>6</sub>): δ 175.5, 155.7, 155.4, 151.3, 142.7, 137.8, 135.6, 132.3, 129.54, 129.49, 127.2, 122.7, 121.6, 119.4, 119.2, 116.4, 114.4, 112.3, 108.9, 57.9, 55.9, 27.2. HRMS (ESI) *m/z*: [M+H]<sup>+</sup> Calcd for C<sub>23</sub>H<sub>20</sub>N<sub>3</sub>O<sub>3</sub> 386.1499; Found 386.1504.

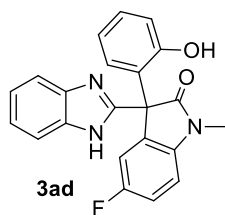

### 3-(1*H*-Benzo[*d*]imidazol-2-yl)-5-fluoro-3-(2-hydroxyphenyl)-1-methylindolin-2-one (3ad)

Eluent: petroleum ether/ethyl acetate (3:1). White solid (57.5 mg, 77%), mp 219.8-220.2 °C. <sup>1</sup>H NMR (400 MHz, DMSO-*d*<sub>6</sub>): δ 12.23 (br s, 1H), 9.76 (s, 1H), 7.55 (br s, 2H), 7.20-7.13 (m, 5H), 7.09-7.06 (m, 1H), 6.77-6.74 (m, 2H), 6.61 (d, *J* = 6.8 Hz, 1H), 3.23 (s, 3H). <sup>13</sup>C{<sup>1</sup>H} NMR (150 MHz, DMSO-*d*<sub>6</sub>): δ 175.5, 158.8 (d, <sup>1</sup>*J*<sub>C-F</sub> = 234.5 Hz), 155.2, 150.6, 142.6, 140.5, 135.5, 132.7 (d, <sup>3</sup>*J*<sub>C-F</sub> = 7.7 Hz), 129.7, 129.6, 126.7, 122.9, 121.7, 121.1, 119.5, 119.3, 118.9, 116.3, 114.8 (d, <sup>2</sup>*J*<sub>C-F</sub> = 23.0 Hz), 114.3 (d, <sup>2</sup>*J*<sub>C-F</sub> = 25.7 Hz), 112.4,



109.5 (d,  $^3J_{C-F} = 8.0$  Hz), 57.8, 27.3.  $^{19}\text{F}$  NMR (376 MHz, DMSO- $d_6$ ):  $\delta$  -113.08 – -113.14 (m). HRMS (ESI)  $m/z$ :  $[\text{M}+\text{H}]^+$  Calcd for  $\text{C}_{22}\text{H}_{17}\text{FN}_3\text{O}_2$  374.1299; Found 374.1301.

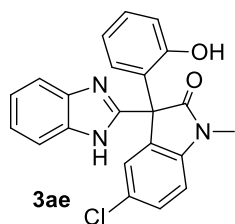

### 3-(1H-Benzo[d]imidazol-2-yl)-5-chloro-3-(2-hydroxyphenyl)-1-methylindolin-2-one (3ae)

Eluent: petroleum ether/ethyl acetate (3:1). White solid (49.9 mg, 64%), mp 237.4-238.8 °C.  $^1\text{H}$  NMR (400 MHz, DMSO- $d_6$ ):  $\delta$  12.26 (s, 1H), 9.80 (s, 1H), 7.61 (d,  $J = 7.6$  Hz, 1H), 7.51 (d,  $J = 7.6$  Hz, 1H), 7.39 (dd,  $J_1 = 8.4$  Hz,  $J_2 = 2.0$  Hz, 1H), 7.33 (d,  $J = 2.0$  Hz, 1H), 7.21-7.12 (m, 3H), 7.10 (d,  $J = 8.4$  Hz, 1H), 6.77-6.74 (m, 2H), 6.62-6.60 (m, 1H), 3.23 (s, 3H).  $^{13}\text{C}\{^1\text{H}\}$  NMR (100 MHz, DMSO- $d_6$ ):  $\delta$  175.5, 155.2, 150.5, 143.2, 142.6, 135.6, 132.9, 129.8, 129.6, 128.5, 126.65, 126.55, 126.4, 122.9, 121.8, 119.6, 119.3, 116.3, 112.4, 110.2, 57.6, 27.3. HRMS (ESI)  $m/z$ :  $[\text{M}+\text{H}]^+$  Calcd for  $\text{C}_{22}\text{H}_{17}\text{ClN}_3\text{O}_2$  390.1004; Found 390.1003.

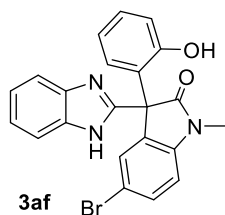

### 3-(1H-Benzo[d]imidazol-2-yl)-5-bromo-3-(2-hydroxyphenyl)-1-methylindolin-2-one (3af)

Eluent: petroleum ether/ethyl acetate (3:1). White solid (48.6 mg, 56%), mp 253.3-254.3 °C.  $^1\text{H}$  NMR (600 MHz, DMSO- $d_6$ ):  $\delta$  12.24 (br s, 1H), 9.78 (s, 1H), 7.60 (d,  $J = 7.8$  Hz, 1H), 7.52 (dd,  $J_1 = 8.4$  Hz,  $J_2 = 1.8$  Hz, 1H), 7.50 (d,  $J = 8.4$  Hz, 1H), 7.42 (d,  $J = 1.8$  Hz, 1H), 7.19-7.14 (m, 3H), 7.07 (d,  $J = 8.4$  Hz, 1H), 6.77-6.75 (m, 2H), 6.60 (d,  $J = 7.2$  Hz, 1H), 3.22 (s, 3H).  $^{13}\text{C}\{^1\text{H}\}$  NMR (100 MHz, DMSO- $d_6$ ):  $\delta$  175.4, 155.2, 150.5, 143.6, 142.6, 135.7, 133.2, 131.3, 129.8, 129.6, 129.1, 126.7, 122.9, 121.8, 119.6, 119.3, 116.3, 114.3, 112.4, 110.8, 57.5, 27.2. HRMS (ESI)  $m/z$ :  $[\text{M}+\text{H}]^+$  Calcd for  $\text{C}_{22}\text{H}_{17}\text{BrN}_3\text{O}_2$  434.0499; Found 434.0493.

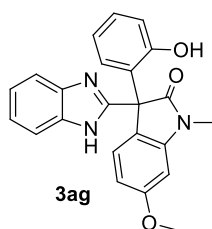

### 3-(1*H*-Benzo[*d*]imidazol-2-yl)-3-(2-hydroxyphenyl)-6-methoxy-1-methylindolin-2-one (3ag)

Eluent: petroleum ether/ethyl acetate (3:1). White solid (40.1 mg, 52%), mp 271.3-272.7 °C. <sup>1</sup>H NMR (600 MHz, DMSO-*d*<sub>6</sub>): δ 12.13 (br s, 1H), 9.67 (s, 1H), 7.57-7.51 (m, 2H), 7.25 (d, *J* = 7.8 Hz, 1H), 7.16-7.13 (m, 3H), 6.74-6.72 (m, 3H), 6.62 (br s, 2H), 3.81 (s, 3H), 3.24 (s, 3H). <sup>13</sup>C{<sup>1</sup>H} NMR (100 MHz, DMSO-*d*<sub>6</sub>): δ 176.4, 160.4, 155.2, 151.6, 145.3, 142.7, 135.7, 129.4, 129.3, 127.6, 127.3, 122.8, 122.6, 121.6, 119.4, 119.1, 116.3, 112.3, 107.1, 96.2, 57.0, 55.9, 27.2. HRMS (ESI) *m/z*: [M+H]<sup>+</sup> Calcd for C<sub>23</sub>H<sub>20</sub>N<sub>3</sub>O<sub>3</sub> 386.1499; Found 386.1501.

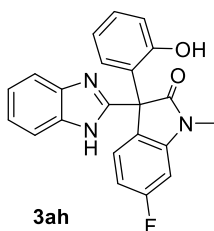

### 3-(1*H*-Benzo[*d*]imidazol-2-yl)-6-fluoro-3-(2-hydroxyphenyl)-1-methylindolin-2-one (3ah)

Eluent: petroleum ether/ethyl acetate (3:1). White solid (53.0 mg, 71%), mp 278.5-279.7 °C. <sup>1</sup>H NMR (400 MHz, DMSO-*d*<sub>6</sub>): δ 12.21 (br s, 1H), 9.75 (s, 1H), 7.55 (br s, 2H), 7.32 (dd, *J*<sub>1</sub> = 8.0 Hz, *J*<sub>2</sub> = 5.6 Hz, 1H), 7.15-7.11 (m, 3H), 7.05 (dd, *J*<sub>1</sub> = 9.2 Hz, *J*<sub>2</sub> = 2.0 Hz, 1H), 6.87-6.82 (m, 1H), 6.76-6.73 (m, 2H), 6.58 (d, *J* = 8.0 Hz, 1H), 3.23 (s, 3H). <sup>13</sup>C{<sup>1</sup>H} NMR (150 MHz, DMSO-*d*<sub>6</sub>): δ 176.2, 163.0 (d, <sup>1</sup>*J*<sub>C-F</sub> = 241.4 Hz), 155.1, 150.9, 145.9 (d, <sup>3</sup>*J*<sub>C-F</sub> = 12.2 Hz), 142.6, 135.7, 129.54, 129.49, 127.9 (d, <sup>3</sup>*J*<sub>C-F</sub> = 10.1 Hz), 127.2, 126.6, 122.8, 121.7, 119.5, 119.2, 116.3, 112.4, 108.4 (d, <sup>2</sup>*J*<sub>C-F</sub> = 22.8 Hz), 97.4 (d, <sup>2</sup>*J*<sub>C-F</sub> = 28.7 Hz), 57.0, 27.3. <sup>19</sup>F NMR (376 MHz, DMSO-*d*<sub>6</sub>): δ -113.09 – -113.16 (m). HRMS (ESI) *m/z*: [M+H]<sup>+</sup> Calcd for C<sub>22</sub>H<sub>17</sub>FN<sub>3</sub>O<sub>2</sub> 374.1299; Found 374.1303.

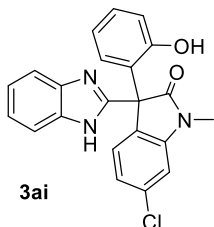

### 3-(1*H*-Benzo[*d*]imidazol-2-yl)-6-chloro-3-(2-hydroxyphenyl)-1-methylindolin-2-one (3ai)

Eluent: petroleum ether/ethyl acetate (3:1). White solid (51.5 mg, 66%), mp 298.5-299.7 °C. <sup>1</sup>H NMR (400 MHz, DMSO-*d*<sub>6</sub>): δ 12.23 (br s, 1H), 9.76 (s, 1H), 7.57 (d, *J* = 7.6 Hz, 1H), 7.50 (d, *J* = 7.6 Hz, 1H), 7.30 (d, *J* = 8.0 Hz, 1H), 7.23 (d, *J* = 1.6 Hz, 1H), 7.18-7.09 (m, 4H), 6.76-6.73 (m, 2H), 6.58 (d, *J* = 6.8 Hz, 1H),

3.24 (s, 3H).  $^{13}\text{C}\{^1\text{H}\}$  NMR (100 MHz, DMSO- $d_6$ ):  $\delta$  176.0, 155.1, 150.5, 145.7, 142.6, 135.7, 133.2, 129.7, 129.6, 129.5, 127.9, 126.9, 122.9, 122.2, 121.7, 119.5, 119.3, 116.3, 112.4, 109.1, 57.1, 27.3. HRMS (ESI)  $m/z$ :  $[\text{M}+\text{H}]^+$  Calcd for  $\text{C}_{22}\text{H}_{17}\text{ClN}_3\text{O}_2$  390.1004; Found 390.1000.

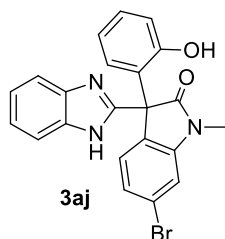

### 3-(1H-Benzo[d]imidazol-2-yl)-6-bromo-3-(2-hydroxyphenyl)-1-methylindolin-2-one (3aj)

Eluent: petroleum ether/ethyl acetate (3:1). White solid (49.5 mg, 57%), mp 233.5-234.2 °C.  $^1\text{H}$  NMR (400 MHz, DMSO- $d_6$ ):  $\delta$  12.23 (br s, 1H), 9.75 (s, 1H), 7.55-7.50 (m, 2H), 7.34 (s, 1H), 7.26-7.22 (m, 2H), 7.16-7.12 (m, 3H), 6.74 (t,  $J = 8.0$  Hz, 2H), 6.57 (d,  $J = 7.2$  Hz, 1H), 3.23 (s, 3H).  $^{13}\text{C}\{^1\text{H}\}$  NMR (100 MHz, DMSO- $d_6$ ):  $\delta$  175.8, 155.1, 150.4, 145.8, 142.5, 135.7, 130.2, 129.6, 129.5, 128.3, 126.8, 125.2, 122.9, 121.8, 121.5, 119.5, 119.2, 116.2, 112.4, 111.8, 57.2, 27.3. HRMS (ESI)  $m/z$ :  $[\text{M}+\text{H}]^+$  Calcd for  $\text{C}_{22}\text{H}_{17}\text{BrN}_3\text{O}_2$  434.0499; Found 434.0495.

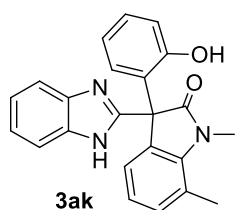

### 3-(1H-Benzo[d]imidazol-2-yl)-3-(2-hydroxyphenyl)-1,7-dimethylindolin-2-one (3ak)

Eluent: petroleum ether/ethyl acetate (3:1). White solid (59.9 mg, 81%), mp 187.5-188.6 °C.  $^1\text{H}$  NMR (400 MHz, DMSO- $d_6$ ):  $\delta$  12.16 (br s, 1H), 9.71 (s, 1H), 7.55 (br s, 2H), 7.19-7.12 (m, 4H), 7.06 (d,  $J = 7.6$  Hz, 1H), 6.94 (t,  $J = 7.6$  Hz, 1H), 6.76-6.74 (m, 2H), 6.61 (d,  $J = 8.0$  Hz, 1H), 3.52 (s, 3H), 2.59 (s, 3H).  $^{13}\text{C}\{^1\text{H}\}$  NMR (150 MHz, DMSO- $d_6$ ):  $\delta$  176.6, 155.2, 151.4, 142.7, 141.8, 135.6, 132.1, 131.4, 129.5, 129.4, 127.6, 124.9, 122.7, 122.4, 121.6, 119.6, 119.4, 119.2, 116.4, 112.4, 57.0, 30.2, 19.1. HRMS (ESI)  $m/z$ :  $[\text{M}+\text{H}]^+$  Calcd for  $\text{C}_{23}\text{H}_{20}\text{N}_3\text{O}_2$  370.1550; Found 370.1553.

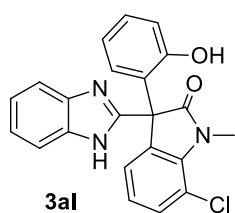

### 3-(1*H*-Benzo[*d*]imidazol-2-yl)-7-chloro-3-(2-hydroxyphenyl)-1-methylindolin-2-one (3al)

Eluent: petroleum ether/ethyl acetate (3:1). White solid (49.1 mg, 63%), mp 179.8-180.7 °C. <sup>1</sup>H NMR (400 MHz, DMSO-*d*<sub>6</sub>): δ 12.27 (s, 1H), 9.84 (s, 1H), 7.58 (d, *J* = 7.6 Hz, 1H), 7.51 (d, *J* = 7.6 Hz, 1H), 7.31 (d, *J* = 8.0 Hz, 1H), 7.25 (d, *J* = 7.2 Hz, 1H), 7.21-7.13 (m, 3H), 7.05 (t, *J* = 7.6 Hz, 1H), 6.77-6.72 (m, 2H), 6.57 (d, *J* = 7.6 Hz, 1H), 3.56 (s, 3H). <sup>13</sup>C{<sup>1</sup>H} NMR (100 MHz, DMSO-*d*<sub>6</sub>): δ 176.4, 155.0, 150.2, 142.6, 139.9, 135.7, 133.7, 130.5, 129.7, 129.6, 127.1, 126.0, 123.8, 123.0, 121.8, 119.5, 119.3, 116.2, 114.3, 112.5, 57.2, 30.4. HRMS (ESI) *m/z*: [M+H]<sup>+</sup> Calcd for C<sub>22</sub>H<sub>17</sub>ClN<sub>3</sub>O<sub>2</sub> 390.1004; Found 390.1001.

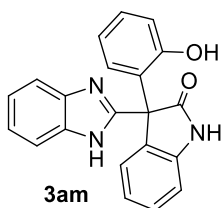

### 3-(1*H*-Benzo[*d*]imidazol-2-yl)-3-(2-hydroxyphenyl)indolin-2-one (3am)

Eluent: petroleum ether/ethyl acetate (3:1). White solid (51.2 mg, 75%), mp 199.3-200.2 °C. <sup>1</sup>H NMR (600 MHz, DMSO-*d*<sub>6</sub>): δ 12.11 (br s, 1H), 10.73 (s, 1H), 9.69 (s, 1H), 7.57-7.52 (m, 2H), 7.33 (d, *J* = 7.2 Hz, 1H), 7.22 (t, *J* = 7.8 Hz, 1H), 7.16-7.13 (m, 3H), 6.98 (t, *J* = 7.8 Hz, 1H), 6.91 (d, *J* = 7.8 Hz, 1H), 6.77-6.74 (m, 2H), 6.64 (d, *J* = 7.8 Hz, 1H). <sup>13</sup>C{<sup>1</sup>H} NMR (100 MHz, DMSO-*d*<sub>6</sub>): δ 177.5, 155.5, 151.7, 142.7, 135.5, 131.9, 129.6, 129.4, 128.4, 127.3, 126.9, 122.6, 121.9, 121.6, 119.4, 119.1, 118.4, 116.4, 112.3, 109.6, 58.1. HRMS (ESI) *m/z*: [M+H]<sup>+</sup> Calcd for C<sub>21</sub>H<sub>16</sub>N<sub>3</sub>O<sub>2</sub> 342.1237; Found 342.1233.

## 2. Typical procedure for the synthesis of 5aa and spectroscopic data of 5aa-5ac

To a reaction tube equipped with a stir bar were added 2-phenoxy-1*H*-benzo[*d*]imidazole (**1a**, 42.1 mg, 0.2 mmol), TFE (2 mL), 4-diazo-2-methylisoquinoline-1,3(2*H*,4*H*)-dione (**4a**, 60.4 mg, 0.3 mmol), [RhCp\*Cl<sub>2</sub>]<sub>2</sub> (3.1 mg, 0.005 mmol), AgNTf<sub>2</sub> (15.5 mg, 0.04 mmol) and NaOAc (24.0 mg, 0.3 mmol) with stirring. The mixture was stirred at 60 °C (oil bath) under air for 1 h. Upon completion, it was cooled to room temperature, filtered through a pad of celite and concentrated under reduced pressure. The residue was purified by silica gel column chromatography using petroleum ether/ethyl acetate (2:1) as eluent to afford **5aa** (61.3 mg, 80%). **5ba-5ac** were obtained in a similar manner.

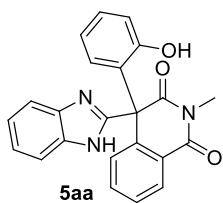

**4-(1H-Benzo[d]imidazol-2-yl)-4-(2-hydroxyphenyl)-2-methylisoquinoline-1,3(2H,4H)-dione (5aa)**

Eluent: petroleum ether/ethyl acetate (2:1). White solid (61.3 mg, 80%), mp 206.6-207.5 °C. <sup>1</sup>H NMR (400 MHz, DMSO-*d*<sub>6</sub>): δ 12.31 (br s, 1H), 9.88 (s, 1H), 8.15 (d, *J* = 7.2 Hz, 1H), 7.61 (t, *J* = 7.2 Hz, 1H), 7.55-7.49 (m, 3H), 7.22-7.13 (m, 4H), 6.85 (t, *J* = 7.2 Hz, 1H), 6.79-6.74 (m, 2H), 3.32 (s, 3H). <sup>13</sup>C{<sup>1</sup>H} NMR (150 MHz, DMSO-*d*<sub>6</sub>): δ 172.7, 164.6, 154.2, 151.4, 142.5, 140.8, 135.7, 133.6, 130.4, 130.3, 129.8, 129.6, 128.0, 127.7, 125.0, 123.3, 122.0, 119.6, 119.4, 116.2, 112.6, 57.4, 27.8. HRMS (ESI) *m/z*: [M+H]<sup>+</sup> Calcd for C<sub>23</sub>H<sub>18</sub>N<sub>3</sub>O<sub>3</sub> 384.1343; Found 384.1340.

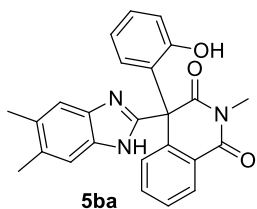

**4-(5,6-Dimethyl-1H-benzo[d]imidazol-2-yl)-4-(2-hydroxyphenyl)-2-methylisoquinoline-1,3(2H,4H)-dione (5ba)**

Eluent: petroleum ether/ethyl acetate (2:1). White solid (50.2 mg, 61%), mp 207.5-208.5 °C. <sup>1</sup>H NMR (600 MHz, DMSO-*d*<sub>6</sub>): δ 12.02 (br, 1H), 9.84 (s, 1H), 8.14 (d, *J* = 7.8 Hz, 1H), 7.60 (t, *J* = 7.2 Hz, 1H), 7.52-7.50 (m, 1H), 7.29 (s, 2H), 7.20 (t, *J* = 7.2 Hz, 1H), 7.11 (d, *J* = 7.2 Hz, 1H), 6.84 (t, *J* = 7.2 Hz, 1H), 6.742-6.737 (m, 2H), 3.32 (s, 3H), 2.27 (s, 6H). <sup>13</sup>C{<sup>1</sup>H} NMR (150 MHz, DMSO-*d*<sub>6</sub>): δ 172.7, 164.7, 154.2, 150.3, 141.2, 140.9, 134.2, 133.5, 131.9, 130.4, 130.3, 130.2, 129.7, 129.6, 128.0, 127.7, 124.9, 119.5, 119.3, 116.2, 112.5, 57.4, 27.8, 20.4. HRMS (ESI) *m/z*: [M+H]<sup>+</sup> Calcd for C<sub>25</sub>H<sub>22</sub>N<sub>3</sub>O<sub>3</sub> 412.1656; Found 412.1653.

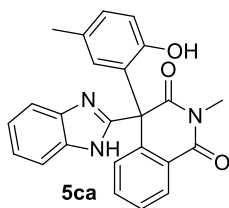

**4-(1H-Benzo[d]imidazol-2-yl)-4-(2-hydroxy-5-methylphenyl)-2-methylisoquinoline-1,3(2H,4H)-dione (5ca)**

Eluent: petroleum ether/ethyl acetate (2:1). White solid (58.8 mg, 74%), mp 205.2-206.3 °C. <sup>1</sup>H NMR (400 MHz, DMSO-*d*<sub>6</sub>): δ 12.31 (s, 1H), 9.63 (s, 1H), 8.14 (d, *J* = 7.6 Hz, 1H), 7.60 (t, *J* = 7.6 Hz, 1H), 7.54-7.48 (m, 3H), 7.21 (t, *J* = 7.6 Hz, 1H), 7.17-7.11 (m, 2H), 7.01 (d, *J* = 8.0 Hz, 1H), 6.64 (d, *J* = 8.0 Hz, 1H), 6.62 (s, 1H), 3.30 (s, 3H), 2.16 (s, 3H). <sup>13</sup>C{<sup>1</sup>H} NMR (100 MHz, DMSO-*d*<sub>6</sub>): δ 172.7, 164.7, 152.0, 151.5, 142.5, 140.9, 135.6, 133.5, 130.4, 130.1, 130.0, 128.0, 127.8, 127.6, 124.9, 123.3, 121.9, 119.6, 116.1, 112.6, 57.4, 27.8, 20.9. HRMS (ESI) *m/z*: [M+H]<sup>+</sup> Calcd for C<sub>24</sub>H<sub>20</sub>N<sub>3</sub>O<sub>3</sub> 398.1499; Found 398.1506.

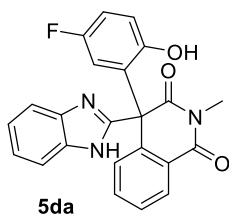

**4-(1*H*-Benzo[*d*]imidazol-2-yl)-4-(5-fluoro-2-hydroxyphenyl)-2-methylisoquinoline-1,3(2*H*,4*H*)-dione (5da)**

Eluent: petroleum ether/ethyl acetate (2:1). White solid (55.4 mg, 69%), mp 210.4-211.3 °C. <sup>1</sup>H NMR (400 MHz, DMSO-*d*<sub>6</sub>): δ 12.40 (br s, 1H), 9.94 (s, 1H), 8.17 (d, *J* = 7.6 Hz, 1H), 7.64 (t, *J* = 7.6 Hz, 1H), 7.55-7.52 (m, 3H), 7.22-7.20 (m, 2H), 7.16 (d, *J* = 7.6 Hz, 1H), 7.09 (td, *J*<sub>1</sub> = 8.4 Hz, *J*<sub>2</sub> = 2.8 Hz, 1H), 6.76 (dd, *J*<sub>1</sub> = 8.8 Hz, *J*<sub>2</sub> = 4.8 Hz, 1H), 6.67 (dd, *J*<sub>1</sub> = 10.0 Hz, *J*<sub>2</sub> = 2.8 Hz, 1H), 3.33 (s, 3H). <sup>13</sup>C{<sup>1</sup>H} NMR (100 MHz, DMSO-*d*<sub>6</sub>): δ 172.1, 164.5, 155.5 (d, <sup>1</sup>*J*<sub>C-F</sub> = 232.9 Hz), 150.9, 150.7 (d, <sup>4</sup>*J*<sub>C-F</sub> = 2.3 Hz), 142.5, 140.2, 135.6, 133.8, 131.3 (d, <sup>3</sup>*J*<sub>C-F</sub> = 7.0 Hz), 130.1, 128.3, 127.9, 125.0, 123.5, 122.1, 119.7, 117.5 (d, <sup>3</sup>*J*<sub>C-F</sub> = 8.0 Hz), 116.5 (d, <sup>2</sup>*J*<sub>C-F</sub> = 24.9 Hz), 116.0 (d, <sup>2</sup>*J*<sub>C-F</sub> = 22.6 Hz), 112.6, 57.3, 27.8. <sup>19</sup>F NMR (376 MHz, DMSO-*d*<sub>6</sub>): δ -125.04 – -125.10 (m). HRMS (ESI) *m/z*: [M+H]<sup>+</sup> Calcd for C<sub>23</sub>H<sub>17</sub>FN<sub>3</sub>O<sub>3</sub> 402.1248; Found 402.1252.

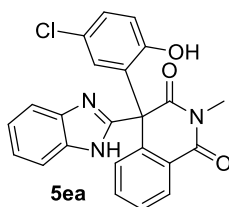

**4-(1*H*-Benzo[*d*]imidazol-2-yl)-4-(5-chloro-2-hydroxyphenyl)-2-methylisoquinoline-1,3(2*H*,4*H*)-dione (5ea)**

Eluent: petroleum ether/ethyl acetate (2:1). White solid (66.9 mg, 80%), mp 204.3-205.2 °C. <sup>1</sup>H NMR (400 MHz, DMSO-*d*<sub>6</sub>): δ 12.38 (s, 1H), 10.27 (s, 1H), 8.17-8.15 (m, 1H), 7.67-7.63 (m, 1H), 7.58-7.52 (m, 3H),

7.30 (dd,  $J_1 = 8.4$  Hz,  $J_2 = 2.4$  Hz, 1H), 7.25-7.16 (m, 3H), 6.79-6.77 (m, 2H), 3.32 (s, 3H).  $^{13}\text{C}\{^1\text{H}\}$  NMR (100 MHz, DMSO- $d_6$ ):  $\delta$  172.1, 164.5, 153.4, 150.7, 142.5, 140.1, 135.6, 133.8, 131.9, 130.0, 129.6, 129.2, 128.3, 127.9, 125.0, 123.5, 122.9, 122.2, 119.7, 117.8, 112.7, 57.3, 27.9. HRMS (ESI)  $m/z$ :  $[\text{M}+\text{H}]^+$  Calcd for  $\text{C}_{23}\text{H}_{17}\text{ClN}_3\text{O}_3$  418.0953; Found 418.0952.

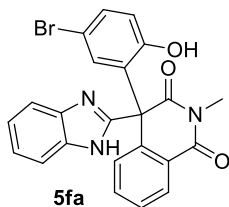

**4-(1H-Benzo[d]imidazol-2-yl)-4-(5-bromo-2-hydroxyphenyl)-2-methylisoquinoline-1,3(2H,4H)-dione (5fa)**

Eluent: petroleum ether/ethyl acetate (2:1). White solid (65.6 mg, 71%), mp 207.3-208.6 °C.  $^1\text{H}$  NMR (600 MHz, DMSO- $d_6$ ):  $\delta$  12.37 (s, 1H), 10.28 (s, 1H), 8.15 (d,  $J = 8.4$  Hz, 1H), 7.65 (t,  $J = 7.8$  Hz, 1H), 7.57-7.52 (m, 3H), 7.41 (dd,  $J_1 = 8.4$  Hz,  $J_2 = 1.8$  Hz, 1H), 7.23 (t,  $J = 7.8$  Hz, 1H), 7.18-7.14 (m, 2H), 6.89 (d,  $J = 1.8$  Hz, 1H), 6.73 (d,  $J = 8.4$  Hz, 1H), 3.31 (s, 3H).  $^{13}\text{C}\{^1\text{H}\}$  NMR (100 MHz, DMSO- $d_6$ ):  $\delta$  172.1, 164.5, 153.8, 150.7, 142.5, 140.1, 135.5, 133.9, 132.6, 132.4, 131.9, 130.0, 128.3, 127.9, 125.0, 123.5, 122.2, 119.7, 118.4, 112.7, 110.4, 57.3, 27.9. HRMS (ESI)  $m/z$ :  $[\text{M}+\text{H}]^+$  Calcd for  $\text{C}_{23}\text{H}_{17}\text{BrN}_3\text{O}_3$  462.0448; Found 462.0442.

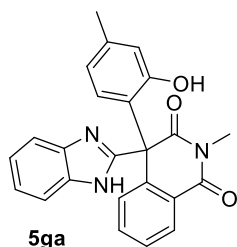

**4-(1H-Benzo[d]imidazol-2-yl)-4-(2-hydroxy-4-methylphenyl)-2-methylisoquinoline-1,3(2H,4H)-dione (5ga)**

Eluent: petroleum ether/ethyl acetate (2:1). White solid (53.3 mg, 67%), mp 186.2-187.9 °C.  $^1\text{H}$  NMR (600 MHz, DMSO- $d_6$ ):  $\delta$  12.28 (br s, 1H), 9.76 (s, 1H), 8.15 (d,  $J = 7.8$  Hz, 1H), 7.61 (t,  $J = 7.8$  Hz, 1H), 7.55-7.53 (m, 2H), 7.51 (t,  $J = 7.8$  Hz, 1H), 7.19-7.15 (m, 3H), 6.67 (s, 2H), 6.57 (s, 1H), 3.32 (s, 3H), 2.23 (s, 3H).  $^{13}\text{C}\{^1\text{H}\}$  NMR (100 MHz, DMSO- $d_6$ ):  $\delta$  172.8, 164.7, 154.1, 151.6, 142.5, 141.0, 139.3, 135.6, 133.5, 130.4, 129.4, 128.0, 127.7, 127.6, 124.9, 123.2, 121.9, 120.0, 119.4, 116.8, 112.5, 57.2, 27.8, 21.2. HRMS (ESI)  $m/z$ :  $[\text{M}+\text{H}]^+$  Calcd for  $\text{C}_{24}\text{H}_{20}\text{N}_3\text{O}_3$  398.1499; Found 398.1494.

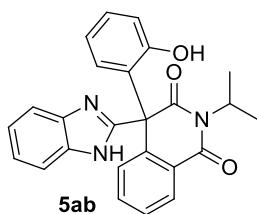

**4-(1*H*-Benzo[*d*]imidazol-2-yl)-4-(2-hydroxyphenyl)-2-isopropylisoquinoline-1,3(2*H*,4*H*)-dione (5ab)**

Eluent: petroleum ether/ethyl acetate (2:1). White solid (72.4 mg, 88%), mp 193.1-194.2 °C. <sup>1</sup>H NMR (400 MHz, DMSO-*d*<sub>6</sub>): δ 12.26 (s, 1H), 9.83 (s, 1H), 8.12 (d, *J* = 7.6 Hz, 1H), 7.60-7.56 (m, 1H), 7.55-7.53 (m, 2H), 7.49 (t, *J* = 7.6 Hz, 1H), 7.22-7.17 (m, 2H), 7.12 (t, *J* = 7.6 Hz, 1H), 7.07 (d, *J* = 7.6 Hz, 1H), 6.81 (t, *J* = 7.6 Hz, 1H), 6.76 (d, *J* = 8.4 Hz, 1H), 6.67 (d, *J* = 7.6 Hz, 1H), 5.16-5.06 (m, 1H), 1.42 (d, *J* = 7.2 Hz, 3H), 1.36 (d, *J* = 6.8 Hz, 3H). <sup>13</sup>C{<sup>1</sup>H} NMR (100 MHz, DMSO-*d*<sub>6</sub>): δ 172.3, 164.7, 154.3, 151.5, 142.6, 140.7, 135.6, 133.3, 130.4, 130.0, 129.7, 129.5, 127.9, 127.8, 125.6, 123.2, 121.9, 119.6, 119.2, 116.2, 112.6, 58.0, 45.5, 20.3, 19.3. HRMS (ESI) *m/z*: [M+H]<sup>+</sup> Calcd for C<sub>25</sub>H<sub>22</sub>N<sub>3</sub>O<sub>3</sub> 412.1656; Found 412.1659.

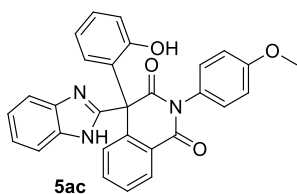

**4-(1*H*-Benzo[*d*]imidazol-2-yl)-4-(2-hydroxyphenyl)-2-(4-methoxyphenyl)isoquinoline-1,3(2*H*,4*H*)-dione (5ac)**

Eluent: petroleum ether/ethyl acetate (2:1). White solid (51.4 mg, 54%), mp 245.8-246.5 °C. <sup>1</sup>H NMR (600 MHz, DMSO-*d*<sub>6</sub>): δ 12.23 (s, 1H), 10.06 (s, 1H), 8.13 (d, *J* = 7.8 Hz, 1H), 7.66 (t, *J* = 7.8 Hz, 1H), 7.59 (d, *J* = 7.8 Hz, 1H), 7.54-7.52 (m, 2H), 7.22-7.21 (m, 3H), 7.15 (t, *J* = 7.8 Hz, 1H), 7.09 (d, *J* = 7.8 Hz, 2H), 7.03 (d, *J* = 7.8 Hz, 2H), 6.84 (t, *J* = 7.8 Hz, 1H), 6.79 (d, *J* = 8.4 Hz, 1H), 6.75 (d, *J* = 7.2 Hz, 1H), 3.79 (s, 3H). <sup>13</sup>C{<sup>1</sup>H} NMR (150 MHz, DMSO-*d*<sub>6</sub>): δ 172.5, 164.7, 159.4, 154.3, 151.4, 142.6, 140.8, 135.7, 133.8, 130.6, 130.4, 130.1, 129.8, 129.5, 128.8, 128.1, 128.0, 125.2, 123.3, 122.0, 119.6, 119.4, 116.4, 114.7, 112.7, 58.0, 55.9. HRMS (ESI) *m/z*: [M+H]<sup>+</sup> Calcd for C<sub>29</sub>H<sub>22</sub>N<sub>3</sub>O<sub>4</sub> 476.1605; Found 476.1623.



### 3. Structural elaborations of 3aa

#### 3.1 Synthesis of product 6

To a round bottom flask were added **3aa** (71.1 mg, 0.2 mmol) and DCM (2 mL) with stirring. Then, DCC (41.3 mg, 0.2 mmol), DMAP (4.9 mg, 0.04 mmol) and ibuprofen (41.3 mg, 0.2 mmol) were added. The mixture was then stirred at room temperature for 12 h. Upon completion, it was washed with water, dried over anhydrous Na<sub>2</sub>SO<sub>4</sub>, filtered through a pad of celite and concentrated under reduced pressure. The residue was purified by silica gel column chromatography using petroleum ether/ethyl acetate (3:1) as eluent to afford **6** as a mixture of two diastereoisomers: **isomer 1** (50.9 mg, 47%), **isomer 2** (29.8 mg, 27%).

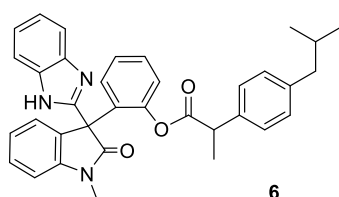

#### 2-(3-(1*H*-Benzo[*d*]imidazol-2-yl)-1-methyl-2-oxoindolin-3-yl)phenyl 2-(4-isobutylphenyl)propanoate (**6**)

**Isomer 1:** Eluent: petroleum ether/ethyl acetate (3:1). White solid (50.9 mg, 47%), mp 242.1-243.5 °C. <sup>1</sup>H NMR (400 MHz, CDCl<sub>3</sub>): δ 10.14 (s, 1H), 7.80-7.78 (m, 1H), 7.52 (d, *J* = 7.2 Hz, 1H), 7.39-7.37 (m, 1H), 7.31 (t, *J* = 7.6 Hz, 1H), 7.27-7.23 (m, 2H), 7.21-7.15 (m, 2H), 7.05-7.00 (m, 3H), 6.91 (d, *J* = 8.0 Hz, 2H), 6.86-6.82 (m, 3H), 3.35-3.27 (m, 4H), 2.41 (d, *J* = 6.8 Hz, 2H), 1.85-1.79 (m, 1H), 1.48 (d, *J* = 7.2 Hz, 3H), 0.88 (d, *J* = 6.8 Hz, 6H). <sup>13</sup>C{<sup>1</sup>H} NMR (150 MHz, CDCl<sub>3</sub>): δ 176.0, 172.1, 149.8, 148.1, 142.9, 142.5, 140.9, 136.4, 134.1, 131.1, 129.9, 129.5, 129.4, 129.2, 129.0, 127.3, 127.1, 126.0, 124.0, 123.5, 123.4, 122.2, 120.2, 111.2, 108.5, 57.0, 45.0, 44.6, 30.2, 27.0, 22.4, 18.5. HRMS (ESI) *m/z*: [M+H]<sup>+</sup> Calcd for C<sub>35</sub>H<sub>34</sub>N<sub>3</sub>O<sub>3</sub> 544.2595; Found 544.2601.

**Isomer 2:** Eluent: petroleum ether/ethyl acetate (3:1). White solid (29.8 mg, 27%), mp 239.3-240.7 °C. <sup>1</sup>H NMR (400 MHz, CDCl<sub>3</sub>): δ 10.08 (s, 1H), 7.80-7.78 (m, 1H), 7.62 (d, *J* = 7.2 Hz, 1H), 7.40-7.35 (m, 2H), 7.24-7.16 (m, 5H), 7.09 (3H, overlapping with CHCl<sub>3</sub>), 7.03 (t, *J* = 8.0 Hz, 1H), 6.92 (d, *J* = 7.6 Hz, 1H), 6.80 (dd, *J*<sub>1</sub> = 8.0 Hz, *J*<sub>2</sub> = 1.2 Hz, 1H), 6.76 (d, *J* = 8.0 Hz, 1H), 3.37 (s, 3H), 3.20 (q, *J* = 7.2 Hz, 1H), 2.44 (d, *J* = 7.2 Hz, 2H), 1.86-1.81 (m, 1H), 0.98 (d, *J* = 7.2 Hz, 3H), 0.89 (d, *J* = 6.8 Hz, 6H). <sup>13</sup>C{<sup>1</sup>H} NMR (400 MHz, CDCl<sub>3</sub>): δ 175.7, 171.7, 149.8, 148.5, 143.0, 142.7, 140.9, 136.9, 134.0, 131.2, 129.71, 129.65, 129.6, 129.3, 129.0, 127.6, 127.0, 126.0, 124.1, 123.6, 123.4, 122.2, 120.2, 111.2, 108.4, 57.2, 45.1, 44.5,

30.2, 27.0, 22.4, 17.9. HRMS (ESI) m/z: [M+H]<sup>+</sup> Calcd for C<sub>35</sub>H<sub>34</sub>N<sub>3</sub>O<sub>3</sub> 544.2595; Found 544.2585.

### 3.2 Synthesis of product 7

To a round bottom flask were added **3aa** (71.1 mg, 0.2 mmol) and DCM (2 mL) with stirring. Then, DCC (41.3 mg, 0.2 mmol), DMAP (4.9 mg, 0.04 mmol) and etodolac (57.5 mg, 0.2 mmol) were added. The mixture was stirred at room temperature for 12 h. Upon completion, it was washed with water, dried over anhydrous Na<sub>2</sub>SO<sub>4</sub>, filtered through a pad of celite and concentrated under reduced pressure. The residue was purified by silica gel column chromatography using petroleum ether/ethyl acetate (3:1) as eluent to afford **7** as a mixture of two diastereoisomers: **isomer 1** (51.1 mg, 41%), **isomer 2** (61.3 mg, 49%).

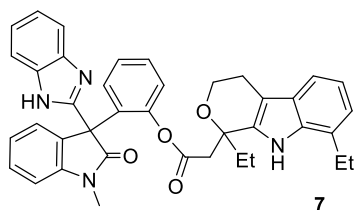

#### 2-(3-(1*H*-benzo[*d*]imidazol-2-yl)-1-methyl-2-oxoindolin-3-yl)phenyl 2-(1,8-diethyl-1,3,4,9-tetrahydropyrano[3,4-*b*]indol-1-yl)acetate (**7**)

**Isomer 1:** Eluent: petroleum ether/ethyl acetate (3:1). White solid (51.1 mg, 41%), mp 148.9-149.9 °C. <sup>1</sup>H NMR (600 MHz, CDCl<sub>3</sub>): δ 10.14 (s, 1H), 8.50 (s, 1H), 7.72 (d, *J* = 7.8 Hz, 1H), 7.43 (d, *J* = 7.2 Hz, 1H), 7.38 (d, *J* = 7.8 Hz, 1H), 7.34-7.31 (m, 2H), 7.18-7.11 (m, 3H), 7.09(t, *J* = 7.8 Hz, 1H), 7.03 (d, *J* = 6.6 Hz, 1H), 6.99 (d, *J* = 8.4 Hz, 1H), 6.79 (d, *J* = 7.8 Hz, 1H), 6.69 (t, *J* = 7.8 Hz, 1H), 6.59 (d, *J* = 7.8 Hz, 1H), 6.56 (t, *J* = 7.2 Hz, 1H), 4.03-4.00 (m, 1H), 3.88-3.85(m, 1H), 3.31 (s, 3H), 2.85-2.80 (m, 2H), 2.77-2.74 (m, 3H), 2.52 (d, *J* = 17.4 Hz, 1H), 2.06-2.02 (m, 1H), 1.94-1.90 (m, 1H), 1.32 (t, *J* = 7.8 Hz, 3H), 0.80 (t, *J* = 7.8 Hz, 3H). <sup>13</sup>C{<sup>1</sup>H} NMR (600 MHz, CDCl<sub>3</sub>): δ 175.9, 170.3, 149.1, 147.4, 142.8, 142.1, 135.0, 134.7, 133.8, 131.5, 130.3, 129.4, 129.0, 128.7, 127.2, 126.6, 126.2, 123.81, 123.78, 123.6, 122.3, 120.3, 120.1, 119.7, 115.9, 111.1, 108.4, 108.2, 74.4, 60.7, 57.0, 42.0, 30.5, 27.1, 24.0, 22.5, 13.7, 7.6. HRMS (ESI) m/z: [M+H]<sup>+</sup> Calcd for C<sub>39</sub>H<sub>37</sub>N<sub>4</sub>O<sub>4</sub> 625.2809; Found 625.2780.

**Isomer 2:** Eluent: petroleum ether/ethyl acetate (3:1). White solid (61.3 mg, 49%), mp 178.7-179.4 °C. <sup>1</sup>H NMR (600 MHz, CDCl<sub>3</sub>): δ 10.10 (s, 1H), 8.54 (s, 1H), 7.76 (d, *J* = 7.2 Hz, 1H), 7.58 (d, *J* = 7.8 Hz, 1H), 7.38-7.34 (m, 3H), 7.28 (t, *J* = 7.8 Hz, 1H), 7.23-7.18 (m, 3H), 7.11 (t, *J* = 7.8 Hz, 1H), 7.07 (t, *J* = 7.2 Hz, 1H), 7.02 (d, *J* = 7.2 Hz, 1H), 6.91-6.90 (m, 2H), 6.82 (d, *J* = 7.8 Hz, 1H), 4.04-4.01 (m, 1H), 3.88-3.85 (m,

1H), 3.20 (s, 3H), 2.90 (d,  $J = 16.8$  Hz, 1H), 2.85-2.82 (m, 3H), 2.73-2.70 (m, 1H), 2.49 (d,  $J = 16.8$  Hz, 1H), 1.98-1.94 (m, 1H), 1.74-1.71 (m, 1H), 1.33 (t,  $J = 7.8$  Hz, 3H), 0.68 (t,  $J = 7.8$  Hz, 3H).  $^{13}\text{C}\{^1\text{H}\}$  NMR (600 MHz,  $\text{CDCl}_3$ ):  $\delta$  175.8, 170.1, 149.3, 147.5, 142.9, 142.6, 134.63, 134.56, 133.9, 131.3, 130.3, 129.33, 129.27, 129.2, 127.4, 126.7, 126.5, 126.1, 124.0, 123.6, 123.5, 122.3, 120.7, 120.3, 119.8, 116.0, 111.1, 109.2, 108.6, 74.6, 60.7, 56.9, 42.6, 31.0, 26.9, 24.1, 22.4, 13.9, 7.6. HRMS (ESI)  $m/z$ :  $[\text{M}+\text{H}]^+$  Calcd for  $\text{C}_{39}\text{H}_{37}\text{N}_4\text{O}_4$  625.2809; Found 625.2806.

#### 4. Gram-scale synthesis of **3aa**

To a reaction tube equipped with a stir bar were added 2-phenoxy-1*H*-benzo[*d*]imidazole (**1a**, 1.05 g, 5 mmol), TFE (30 mL), 3-diazo-1-methylindolin-2-one (**2a**, 1.3 g, 7.5 mmol),  $[\text{RhCp}^*\text{Cl}_2]_2$  (46.4 mg, 0.075 mmol),  $\text{AgNTf}_2$  (194.0 mg, 0.5 mmol) and NaOAc (600.2 mg, 7.5 mmol) with stirring. The mixture was stirred at 60 °C (oil bath) under air for 4 h. Upon completion, it was cooled to room temperature, filtered through a pad of celite and concentrated under reduced pressure. The residue was purified by silica gel column chromatography using petroleum ether/ethyl acetate (3:1) as eluent to afford **3aa** (1.58 g, 89%).

### III. Mechanism studies

#### 1. Studies on the reversibility of C–H bond activation

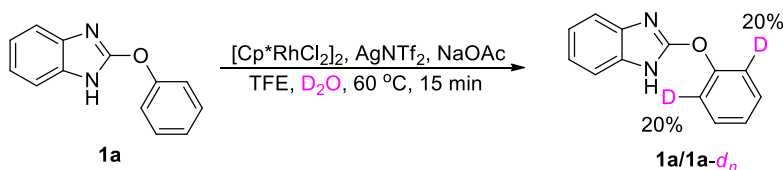

To a reaction tube equipped with a stir bar were charged with 2-phenoxy-1*H*-benzo[*d*]imidazole (**1a**, 42.1 mg, 0.2 mmol), [RhCp\*Cl<sub>2</sub>]<sub>2</sub> (3.1 mg, 0.005 mmol), AgNTf<sub>2</sub> (15.5 mg, 0.04 mmol), NaOAc (24.0 mg, 0.3 mmol), TFE (2 mL) and D<sub>2</sub>O (72 μL, 4 mmol). The tube was sealed, and the mixture was stirred at 60 °C (oil bath) under air for 15 min. Upon analyzing the <sup>1</sup>H NMR spectrum of the resulting mixture, the deuteration percentage at the *ortho* positions of the phenyl moiety of **1a** was calculated as 20%.

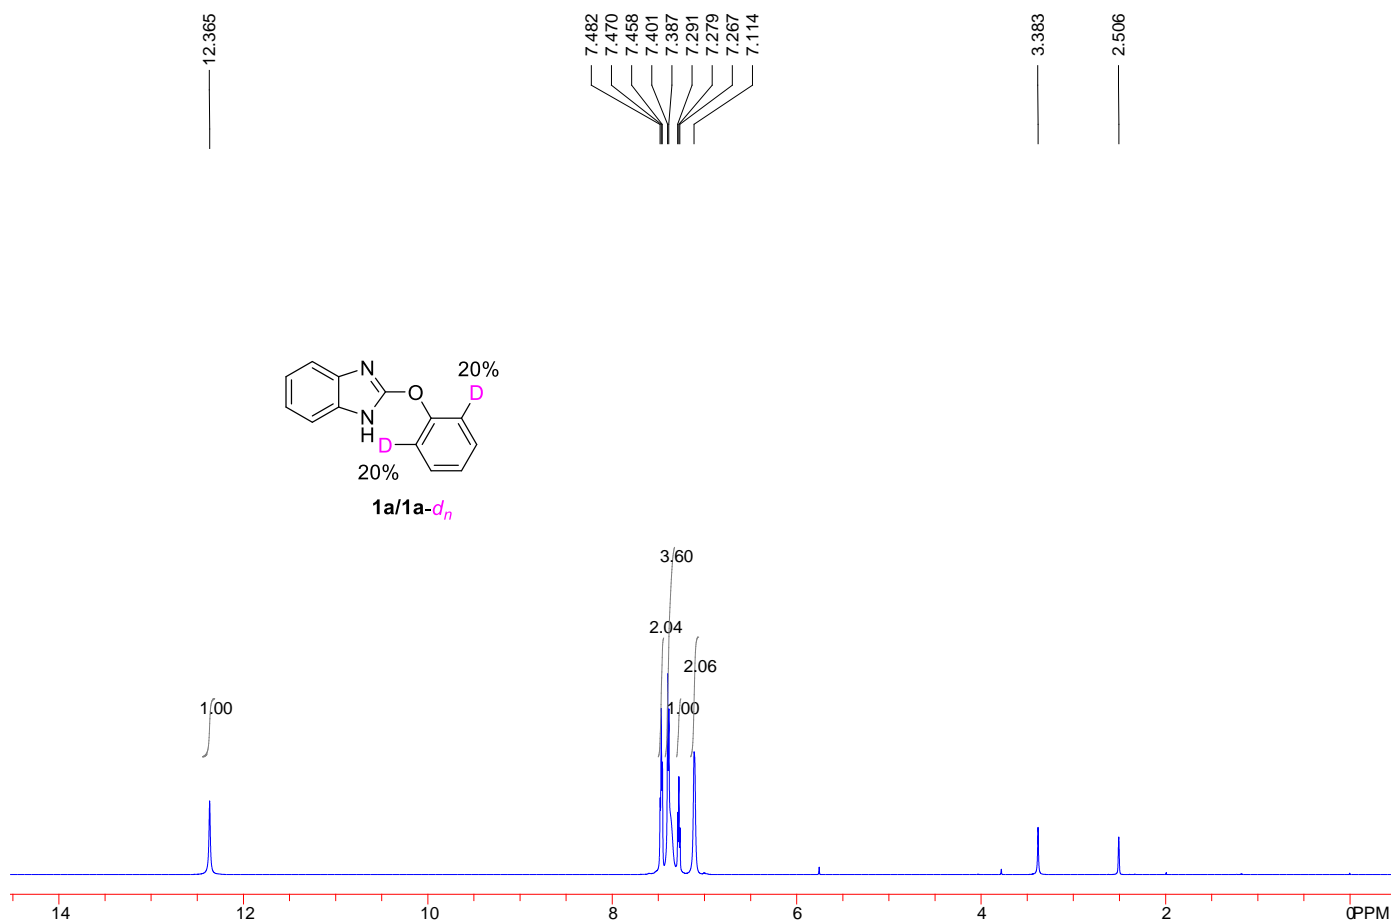

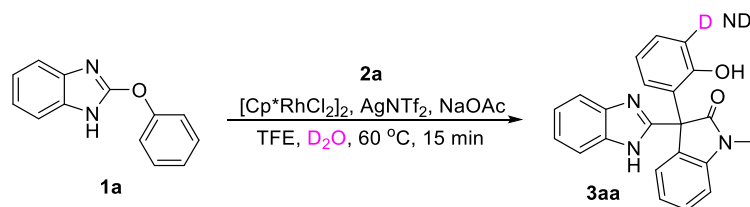

To a reaction tube equipped with a stir bar were added 2-phenoxy-1*H*-benzo[*d*]imidazole (**1a**, 42.1 mg, 0.2 mmol), TFE (2 mL), 3-diazo-1-methylindolin-2-one (**2a**, 52.0 mg, 0.3 mmol),  $[\text{RhCp}^*\text{Cl}_2]_2$  (3.1 mg, 0.005 mmol),  $\text{AgNTf}_2$  (15.5 mg, 0.04 mmol) and  $\text{NaOAc}$  (24.0 mg, 0.3 mmol) with stirring. The mixture was stirred at  $60\text{ }^\circ\text{C}$  (oil bath) under air for 15 min. Then, it was cooled to room temperature, filtered through a pad of celite and concentrated under reduced pressure. The residue was purified by silica gel chromatography using petroleum ether/ethyl acetate (3:1) as eluent to afford **3aa**. Upon analyzing its  $^1\text{H}$  NMR spectrum, no deuteration was observed.

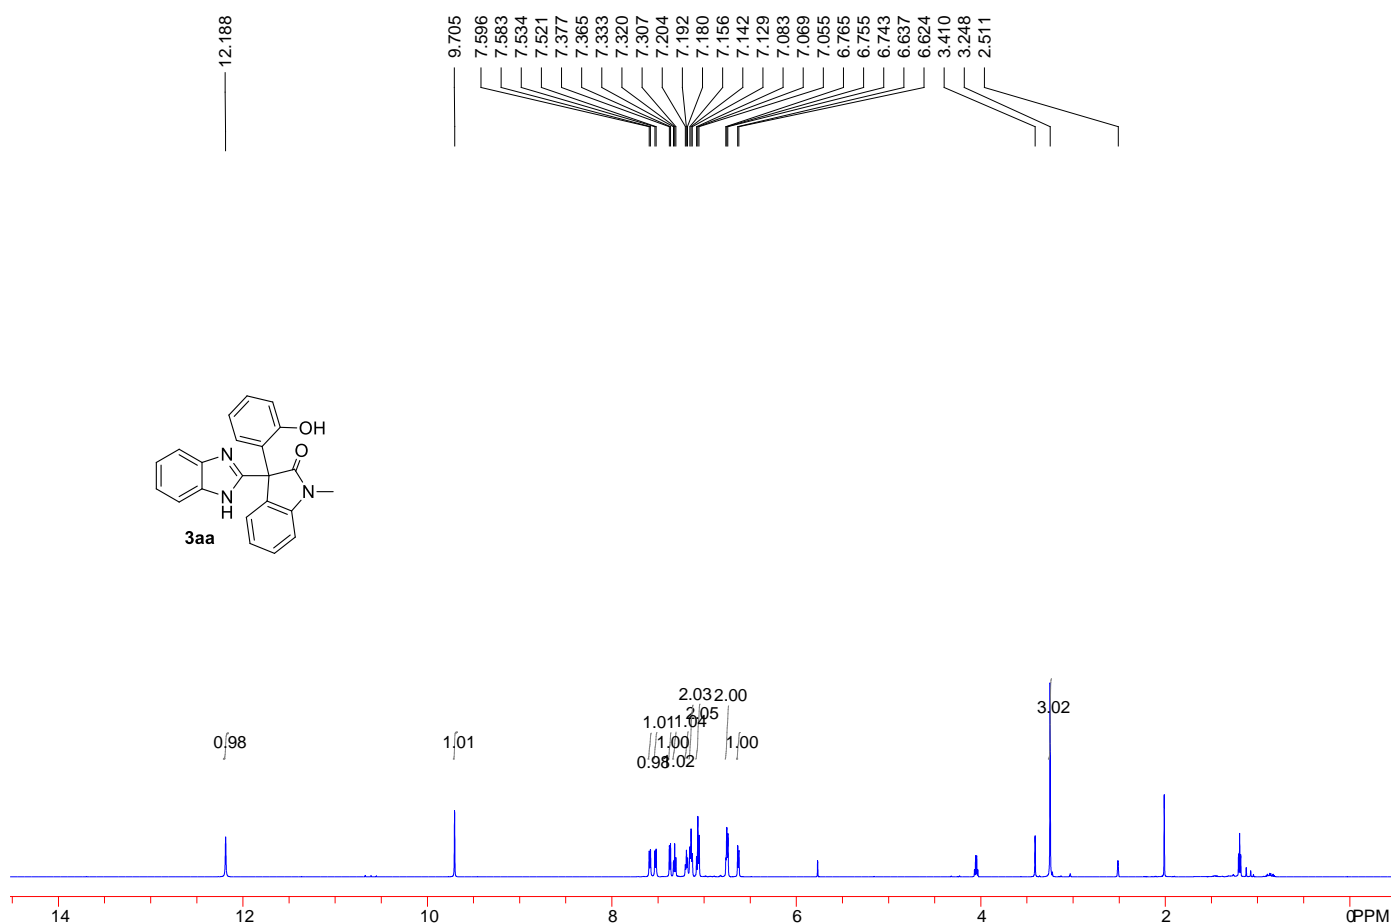

## 2. Kinetic isotope effect study

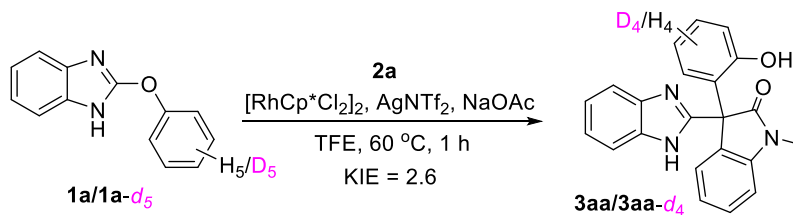

To a reaction tube equipped with a stir bar were added **1a** ( 42.1 mg, 0.2 mmol), **1a-d<sub>5</sub>** ( 43.0 mg, 0.2 mmol), TFE (2 mL), **2a** ( 34.6 mg, 0.2 mmol),  $[\text{RhCp}^*\text{Cl}_2]_2$  (3.1 mg, 0.005 mmol),  $\text{AgNTf}_2$  (15.5 mg, 0.04 mmol) and  $\text{NaOAc}$  (24.0 mg, 0.3 mmol) with stirring. The mixture was stirred at 60 °C under air for 1 h. Upon completion, it was cooled to room temperature, filtered through a pad of celite and concentrated under reduced pressure. The residue was purified by silica gel chromatography using petroleum ether/ethyl acetate (3:1) as eluent to afford a mixture of **3aa** and **3aa-d<sub>4</sub>**. Upon analyzing the  $^1\text{H}$  NMR spectrum of the mixture, the ratio of **3aa** to **3aa-d<sub>4</sub>** was determined as 0.72:0.28. Accordingly, the intermolecular KIE value ( $k_{\text{H}}/k_{\text{D}}$ ) was calculated to be 2.6.

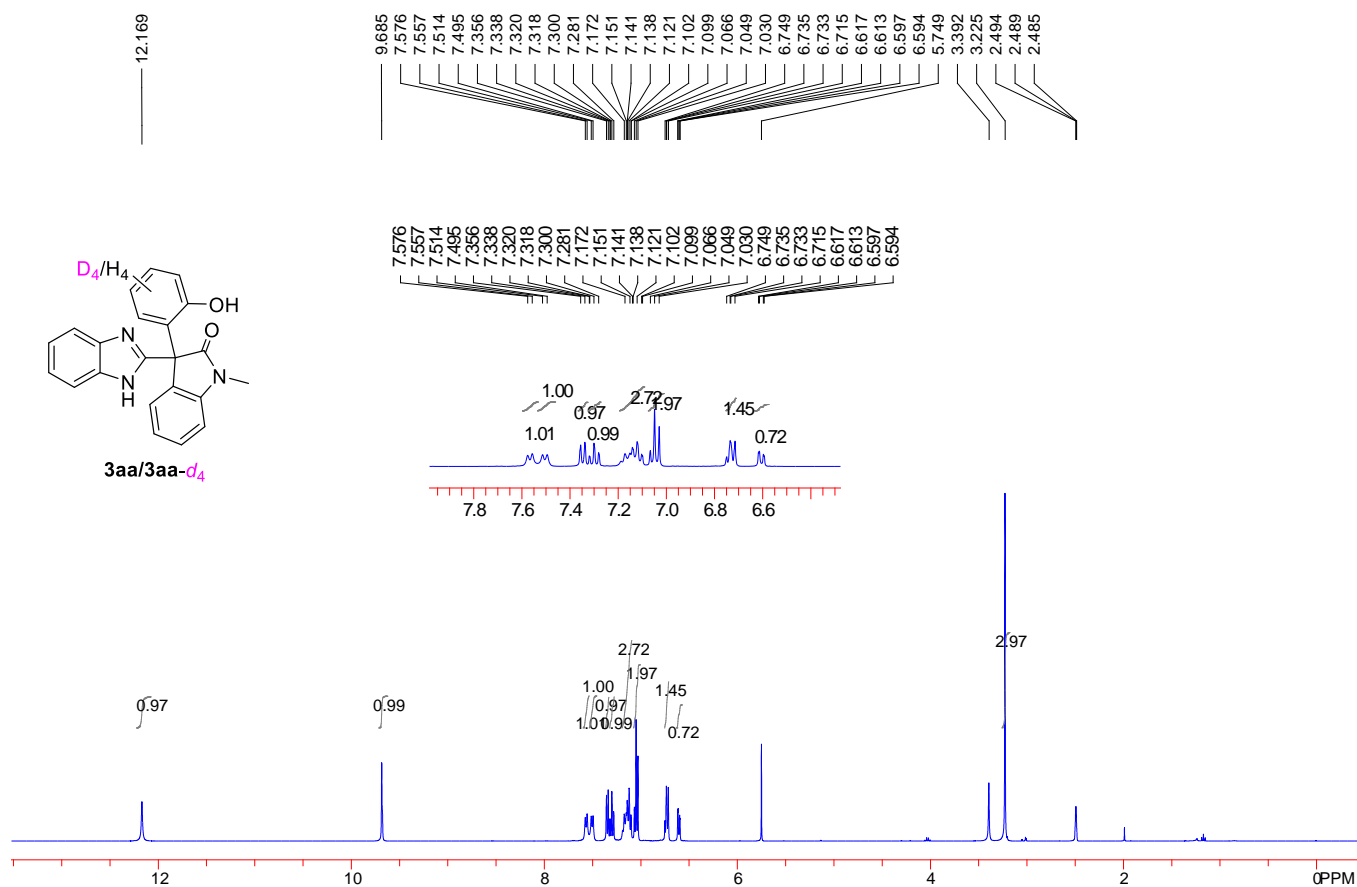

# IV. NMR spectra of 3aa-3am

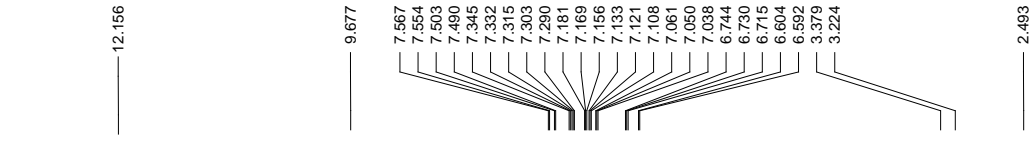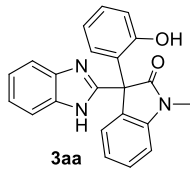

<sup>1</sup>H NMR (600 MHz, DMSO-*d*<sub>6</sub>)

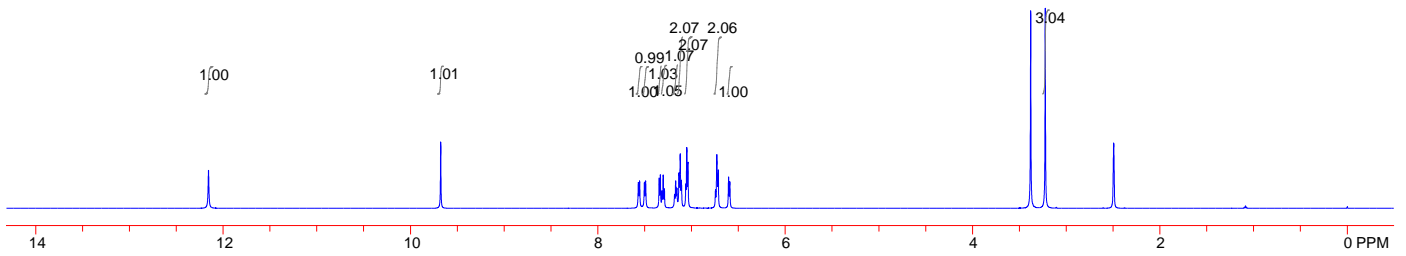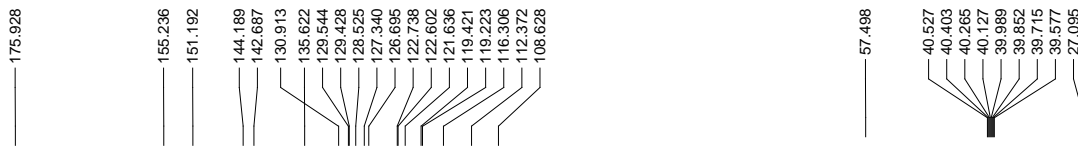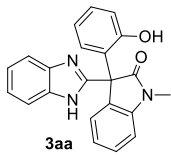

<sup>13</sup>C{<sup>1</sup>H} (100 MHz, DMSO-*d*<sub>6</sub>)

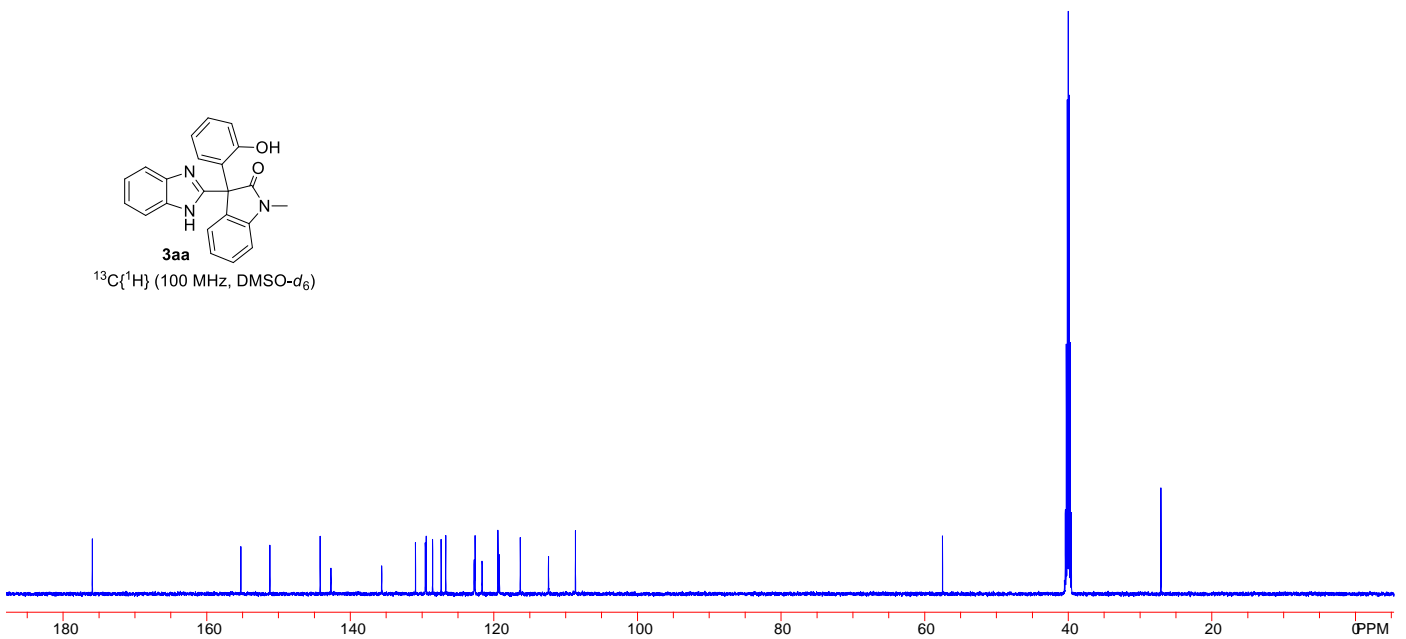

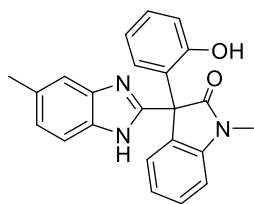

**3ba**

$^1\text{H}$  NMR (600 MHz,  $\text{DMSO-}d_6$ )

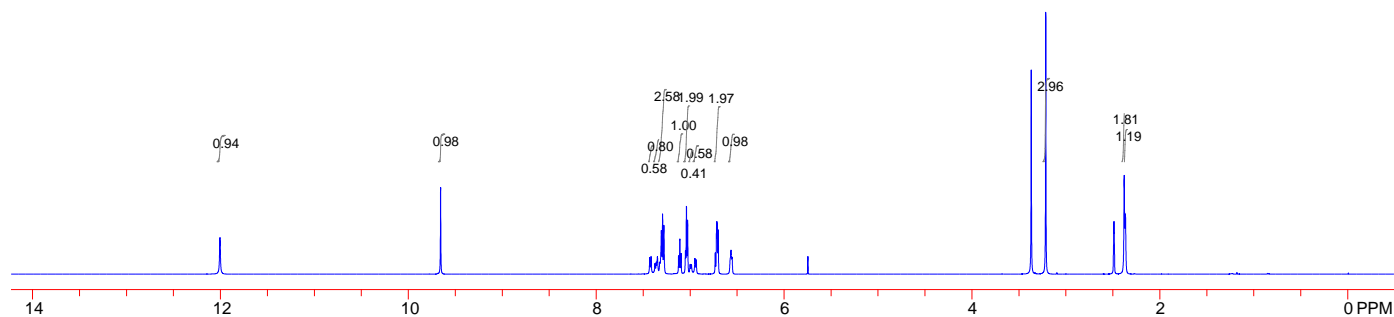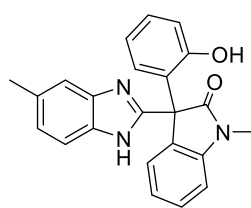

**3ba**

$^{13}\text{C}\{^1\text{H}\}$  (150 MHz,  $\text{DMSO-}d_6$ )

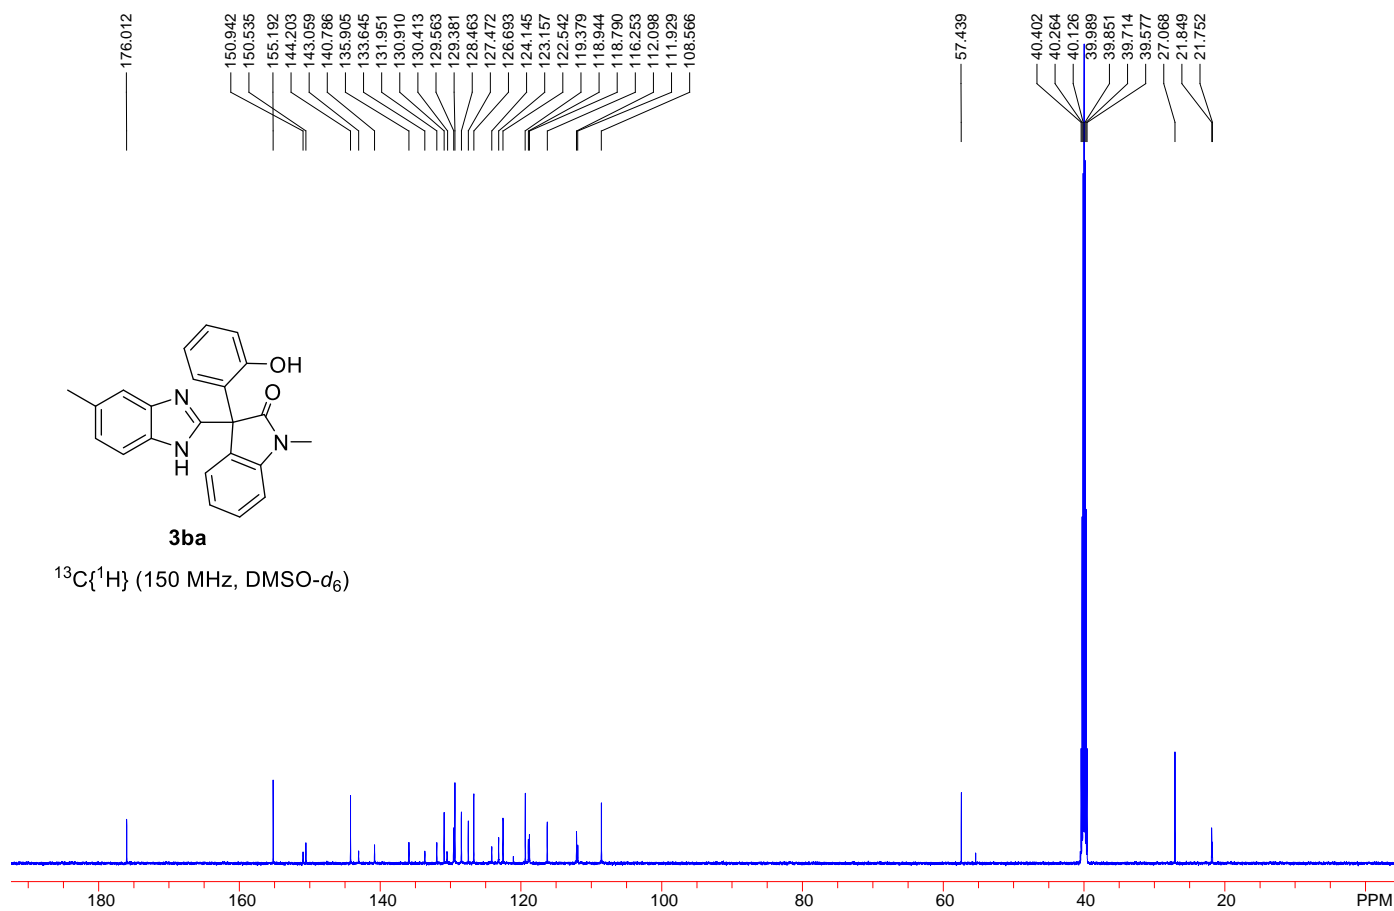



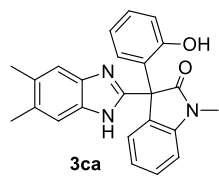

$^1\text{H NMR}$  (400 MHz,  $\text{DMSO-}d_6$ )

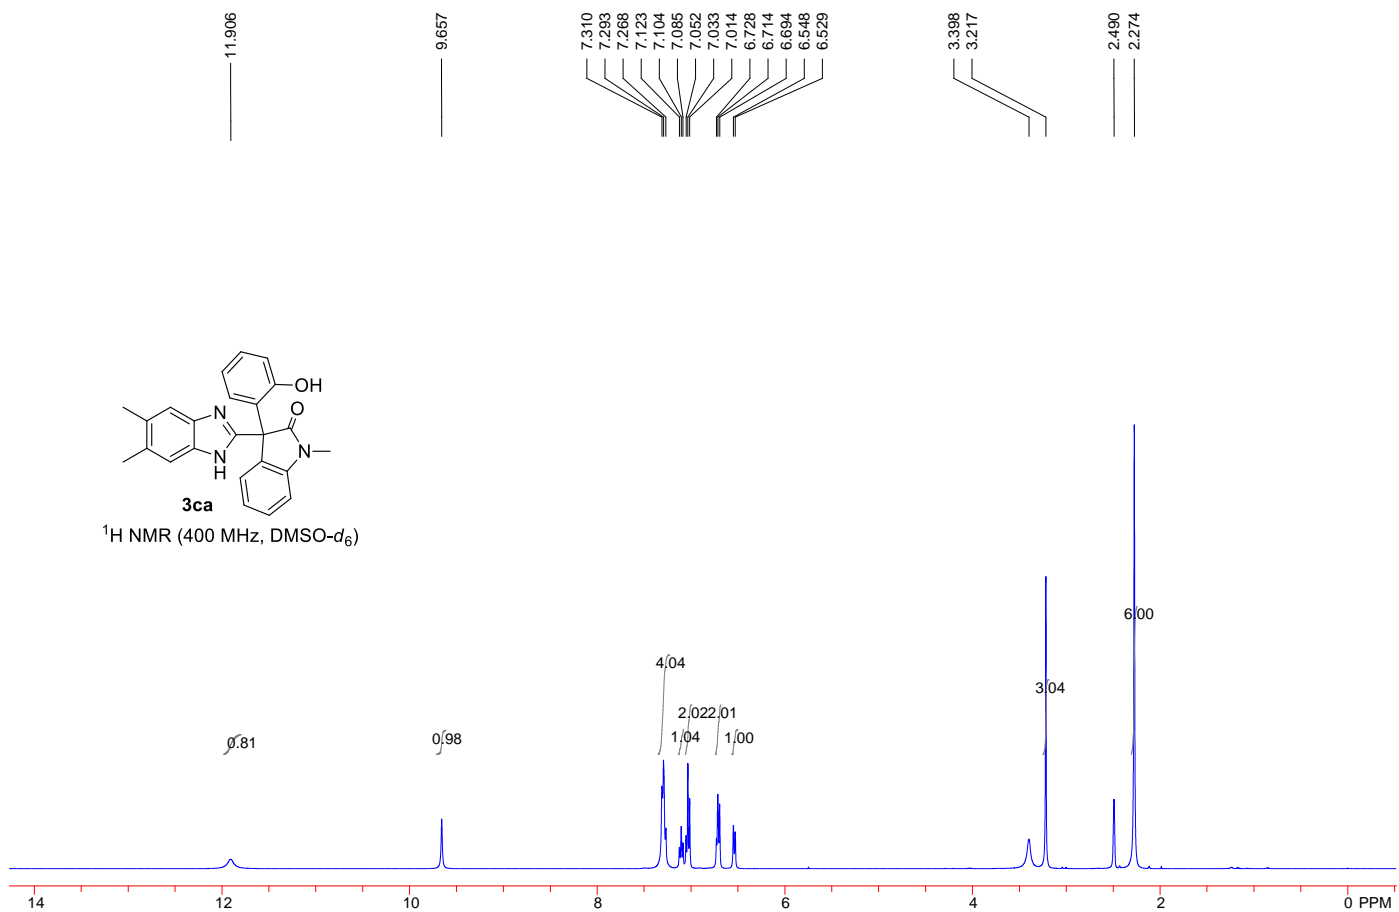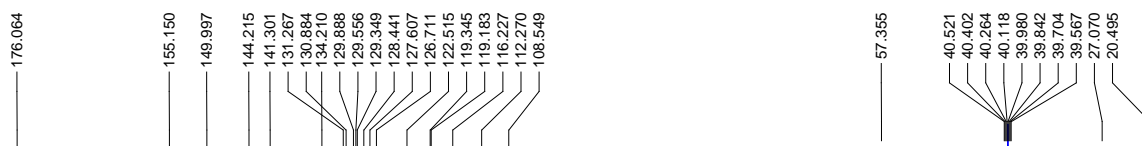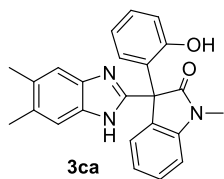

$^{13}\text{C}\{^1\text{H}\}$  (150 MHz,  $\text{DMSO-}d_6$ )

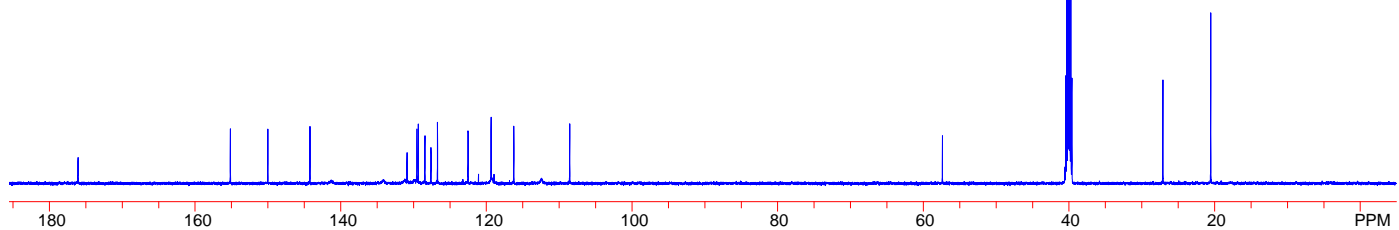

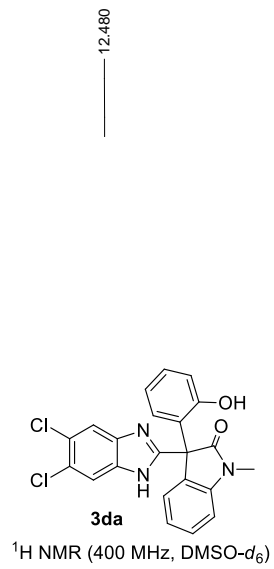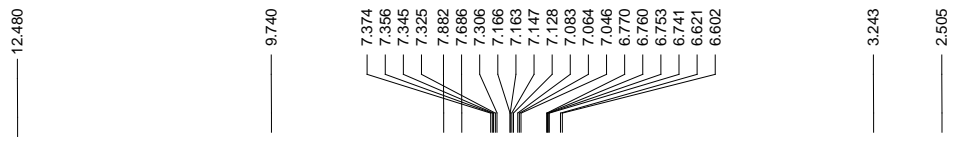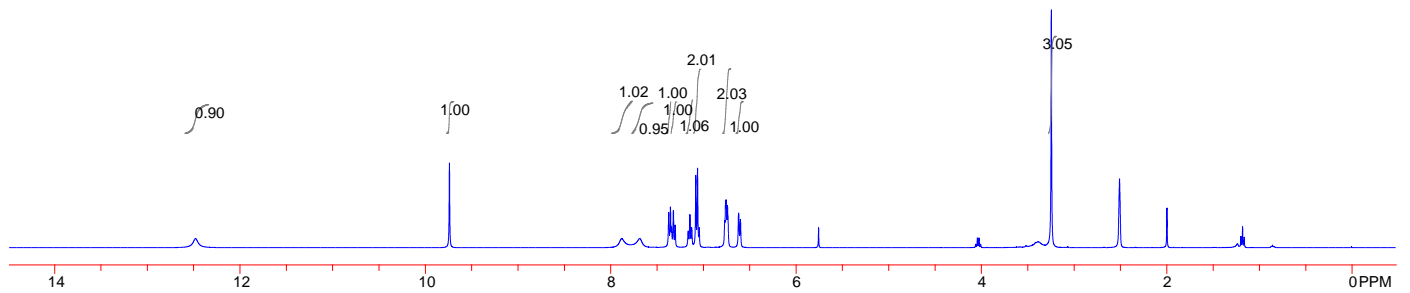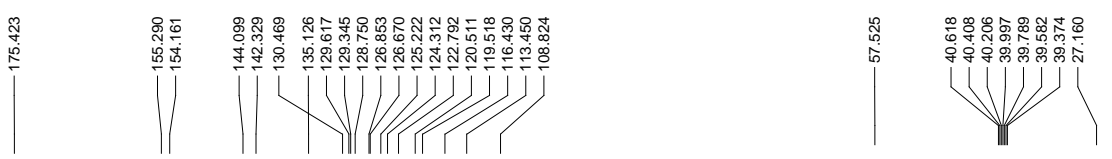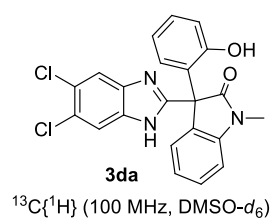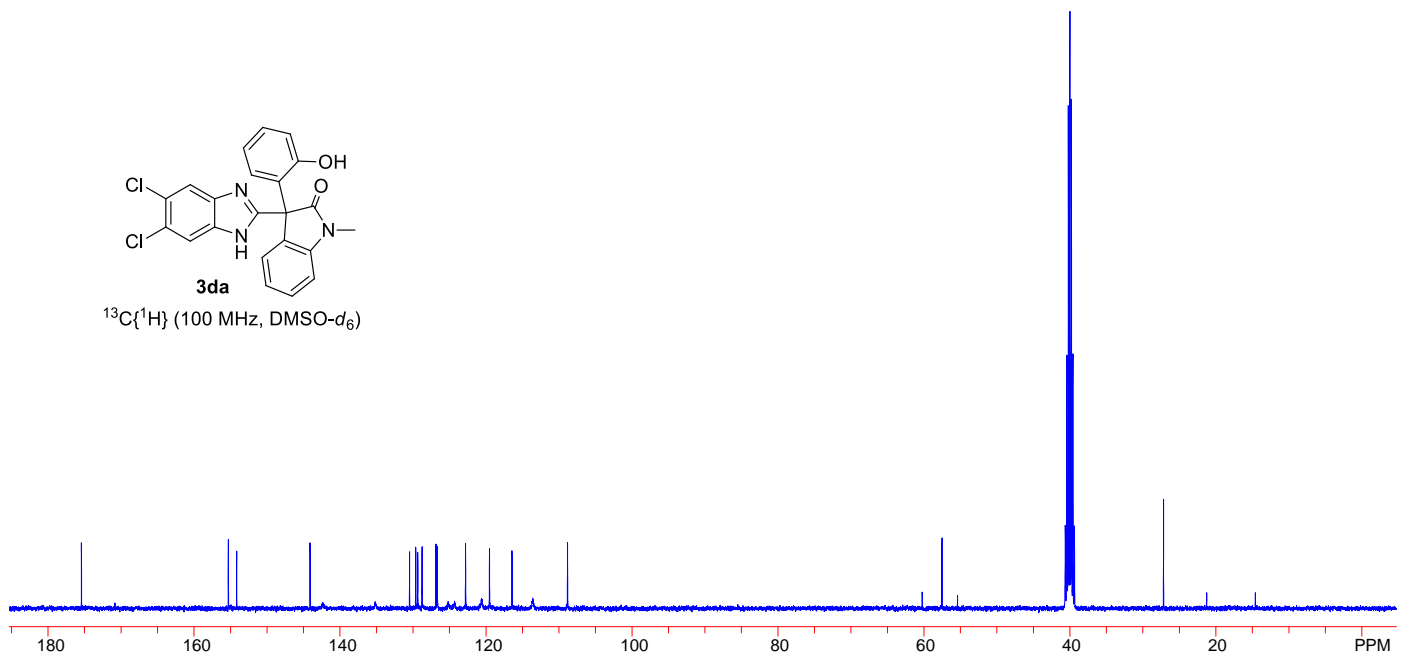

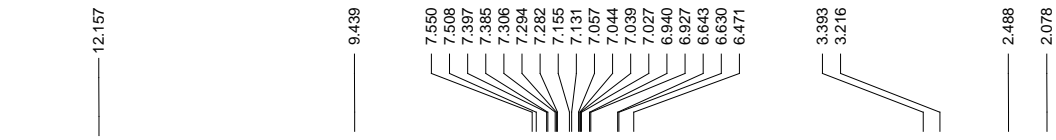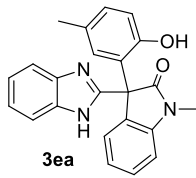

$^1\text{H}$  NMR (600 MHz,  $\text{DMSO-}d_6$ )

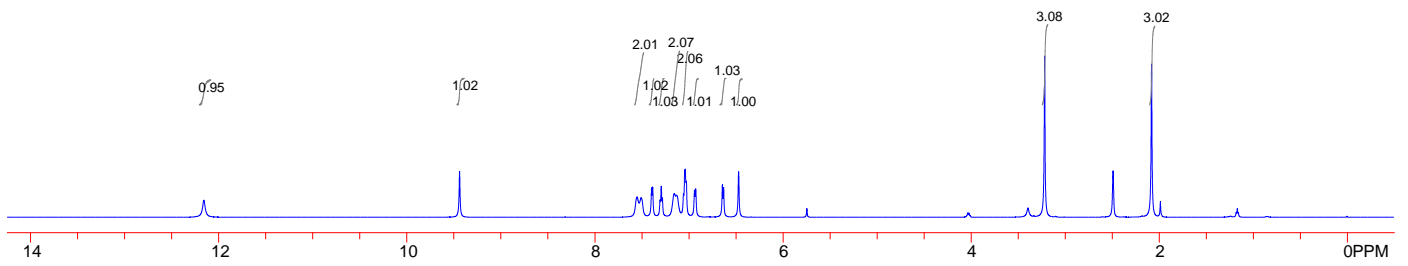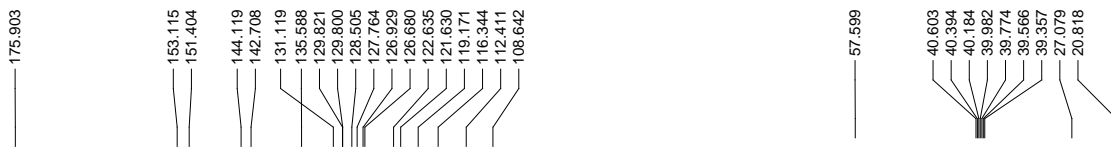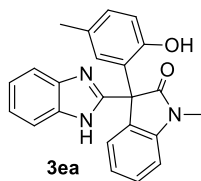

$^{13}\text{C}\{^1\text{H}\}$  (100 MHz,  $\text{DMSO-}d_6$ )

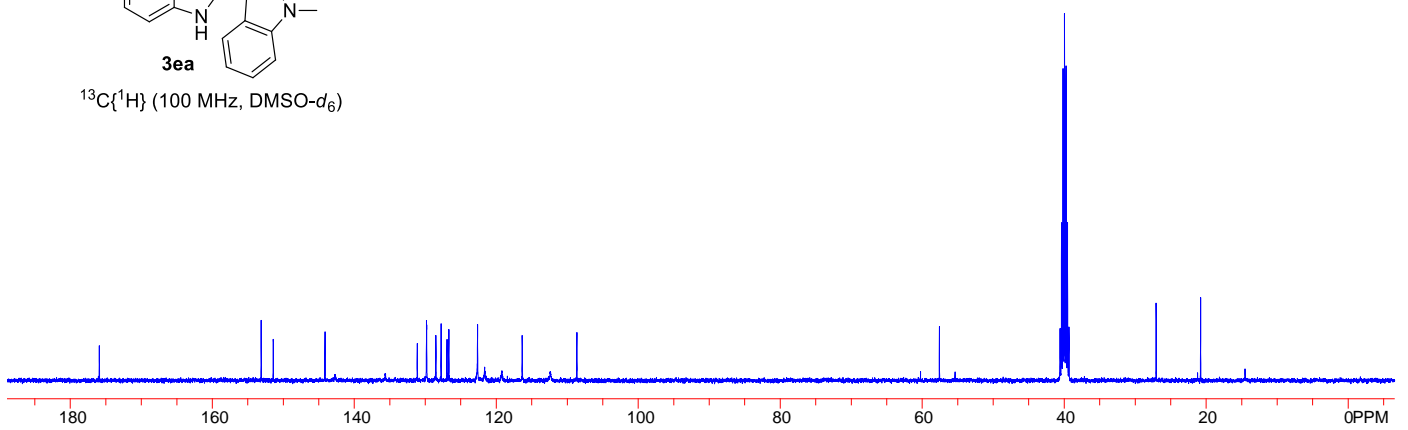

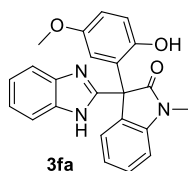

$^1\text{H NMR}$  (600 MHz,  $\text{DMSO-}d_6$ )

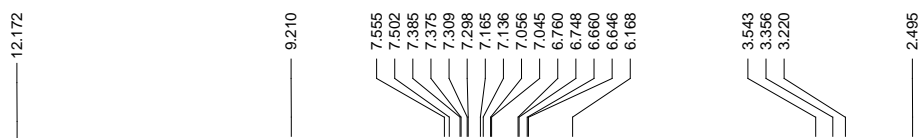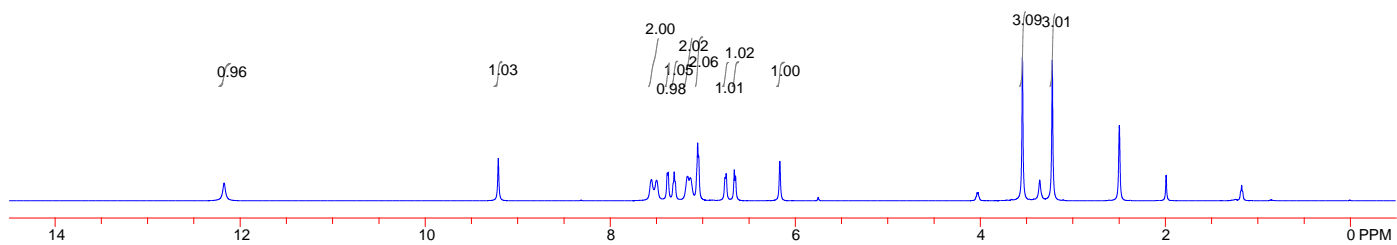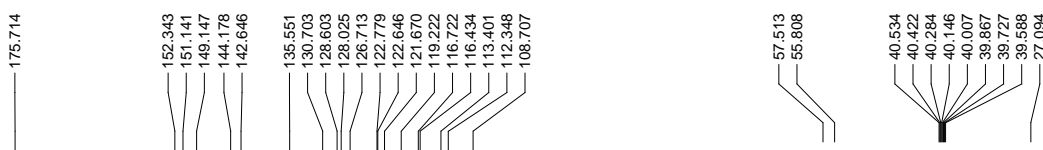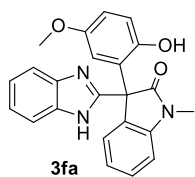

$^{13}\text{C}\{^1\text{H}\}$  (150 MHz,  $\text{DMSO-}d_6$ )

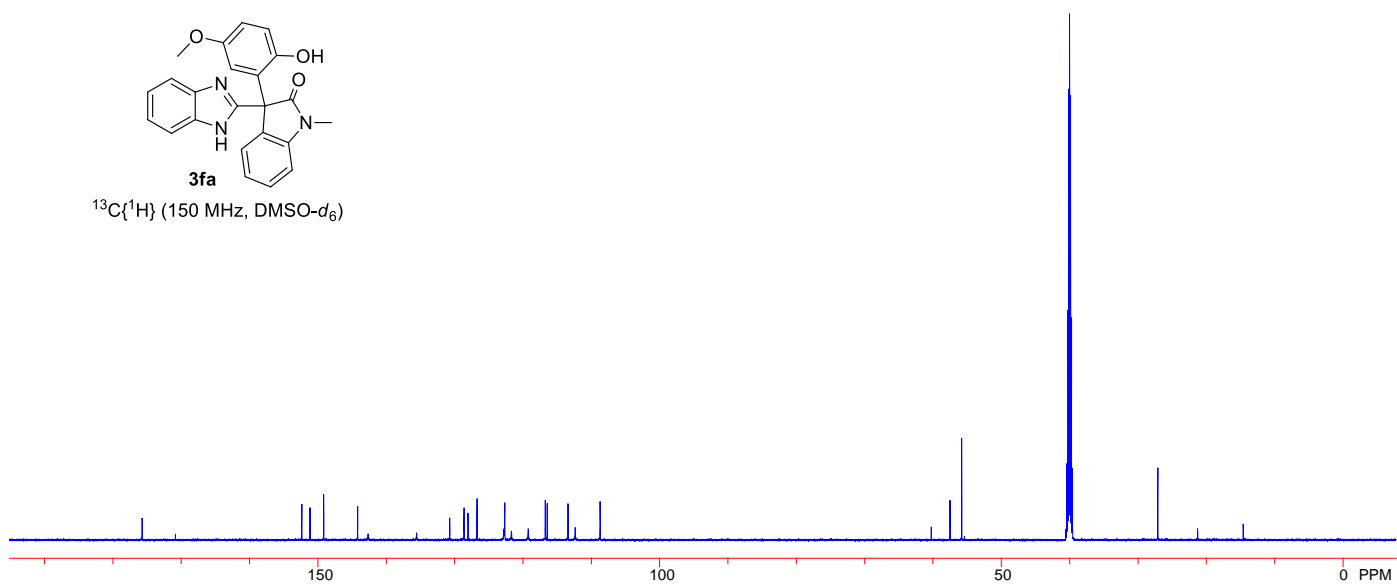

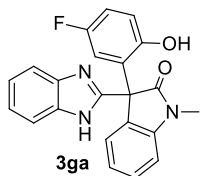

$^1\text{H NMR}$  (600 MHz,  $\text{DMSO-}d_6$ )

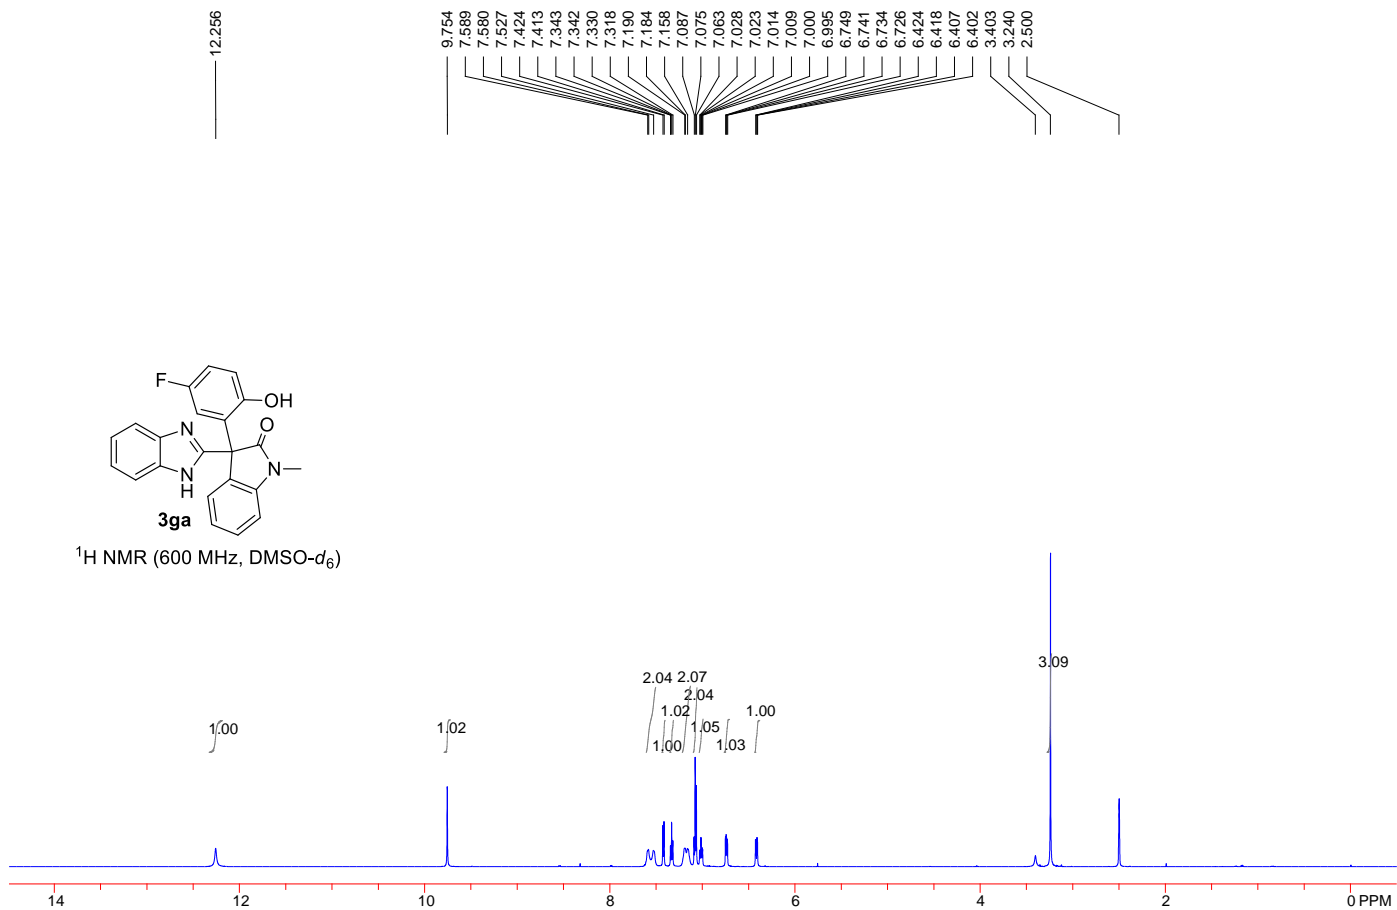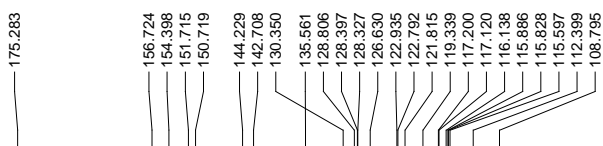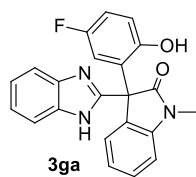

$^{13}\text{C}\{^1\text{H}\}$  (100 MHz,  $\text{DMSO-}d_6$ )

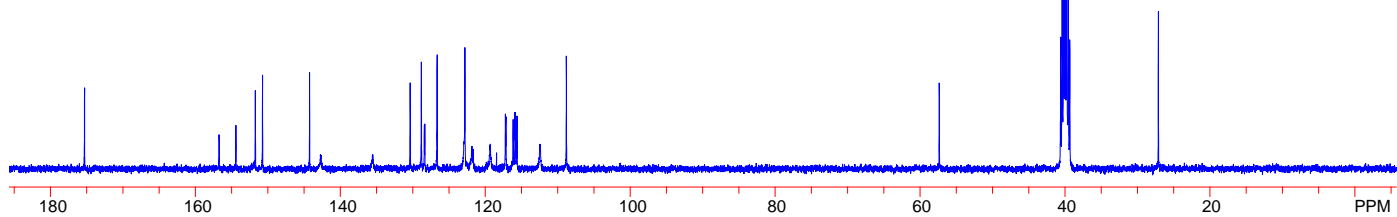

125.412  
125.437  
125.451  
125.471

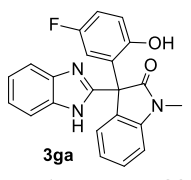

<sup>19</sup>F NMR (376 MHz, DMSO-d<sub>6</sub>)

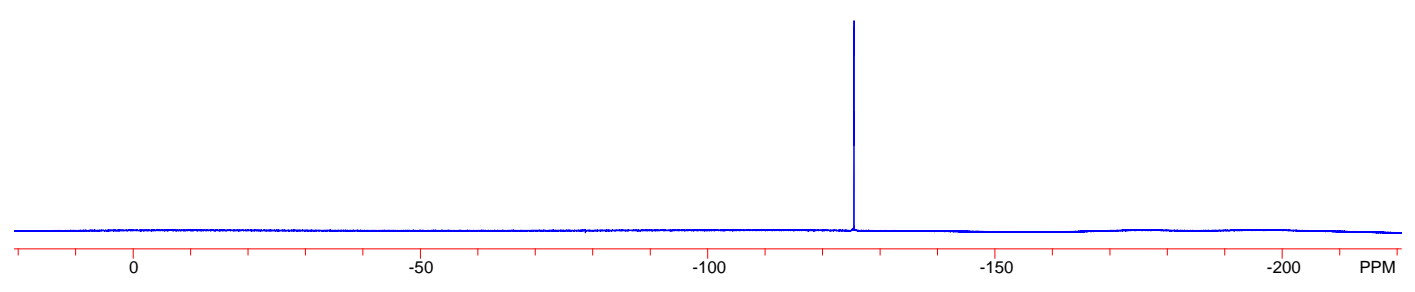

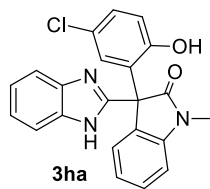

$^1\text{H NMR}$  (600 MHz,  $\text{DMSO-}d_6$ )

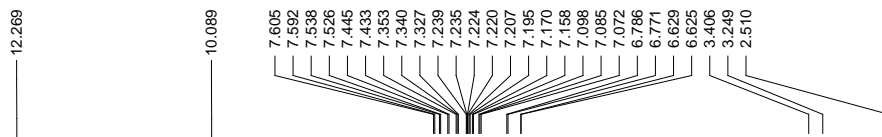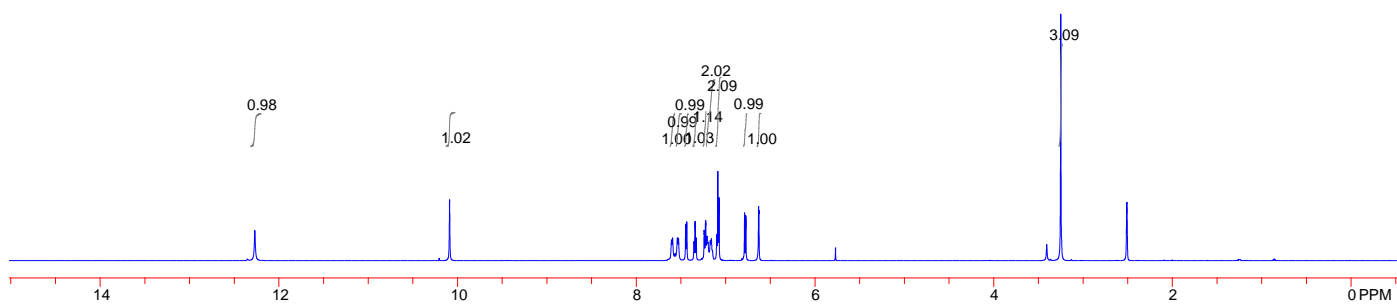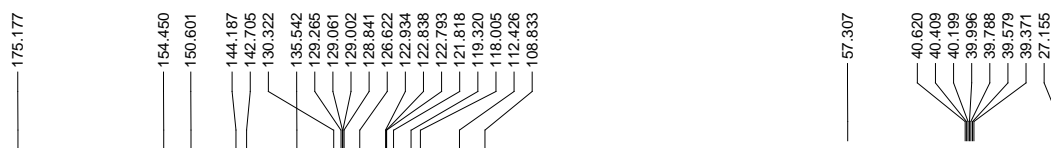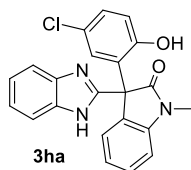

$^{13}\text{C}\{^1\text{H}\}$  (100 MHz,  $\text{DMSO-}d_6$ )

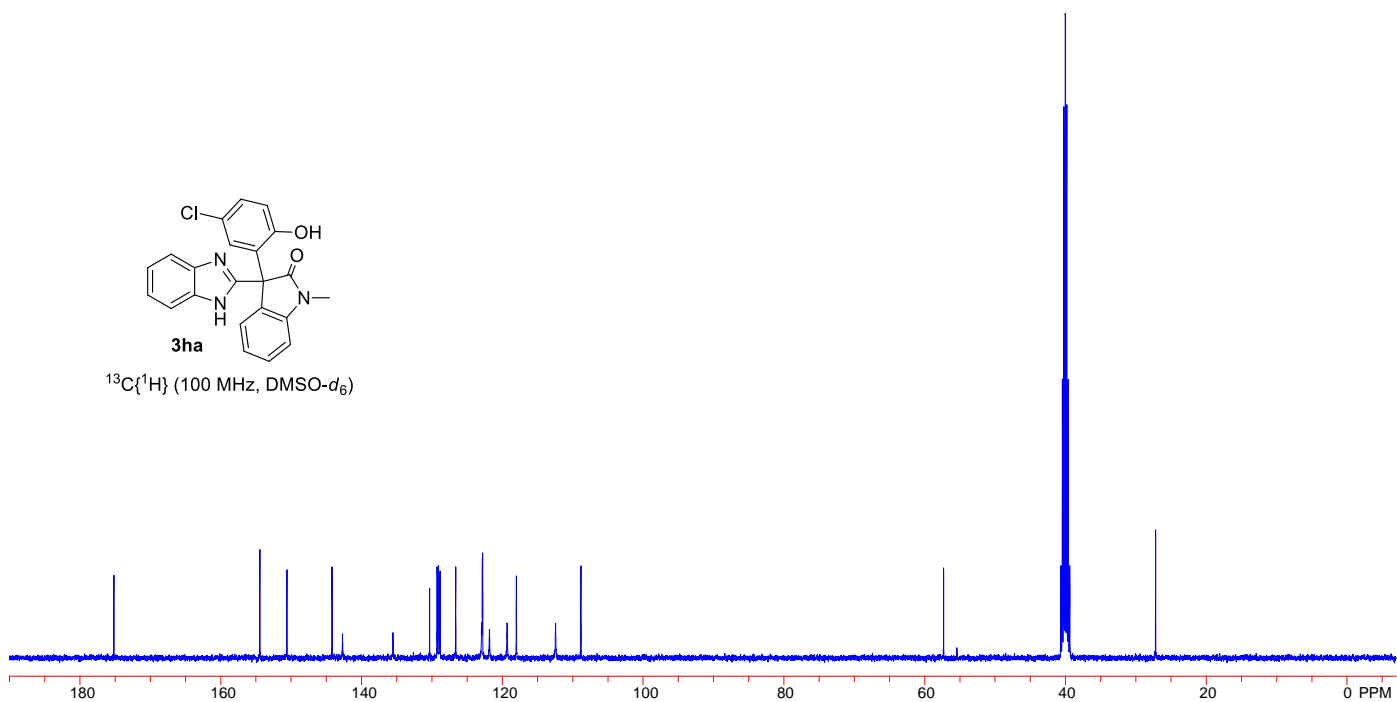

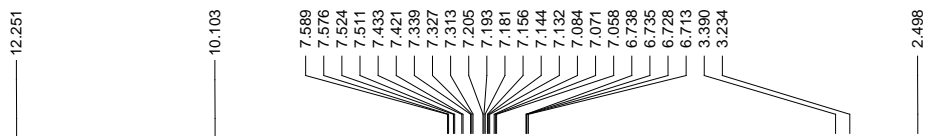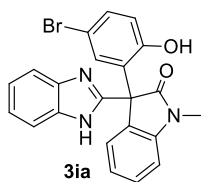

$^1\text{H NMR}$  (600 MHz,  $\text{DMSO-}d_6$ )

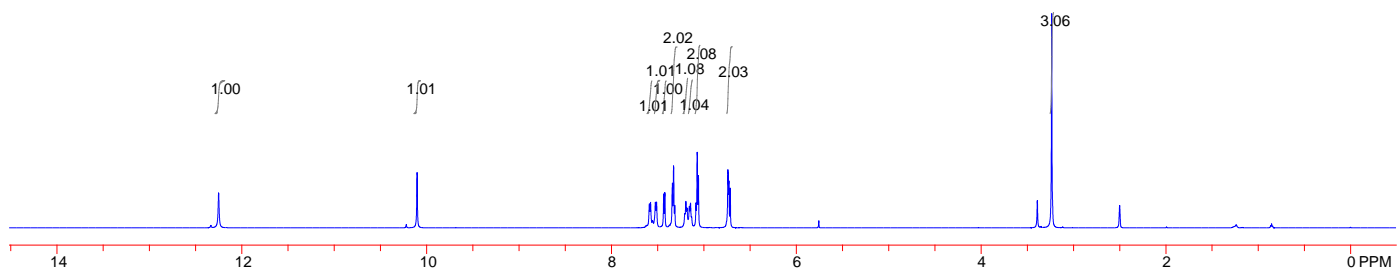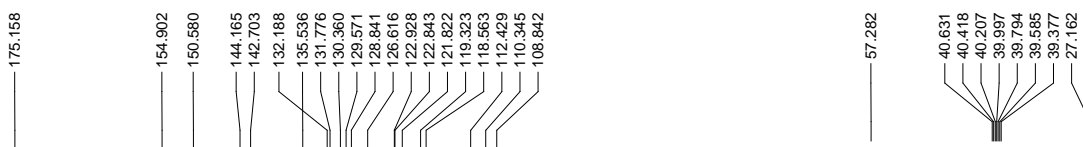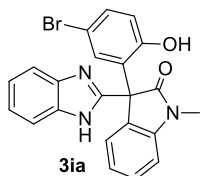

$^{13}\text{C}\{^1\text{H}\}$  (100 MHz,  $\text{DMSO-}d_6$ )

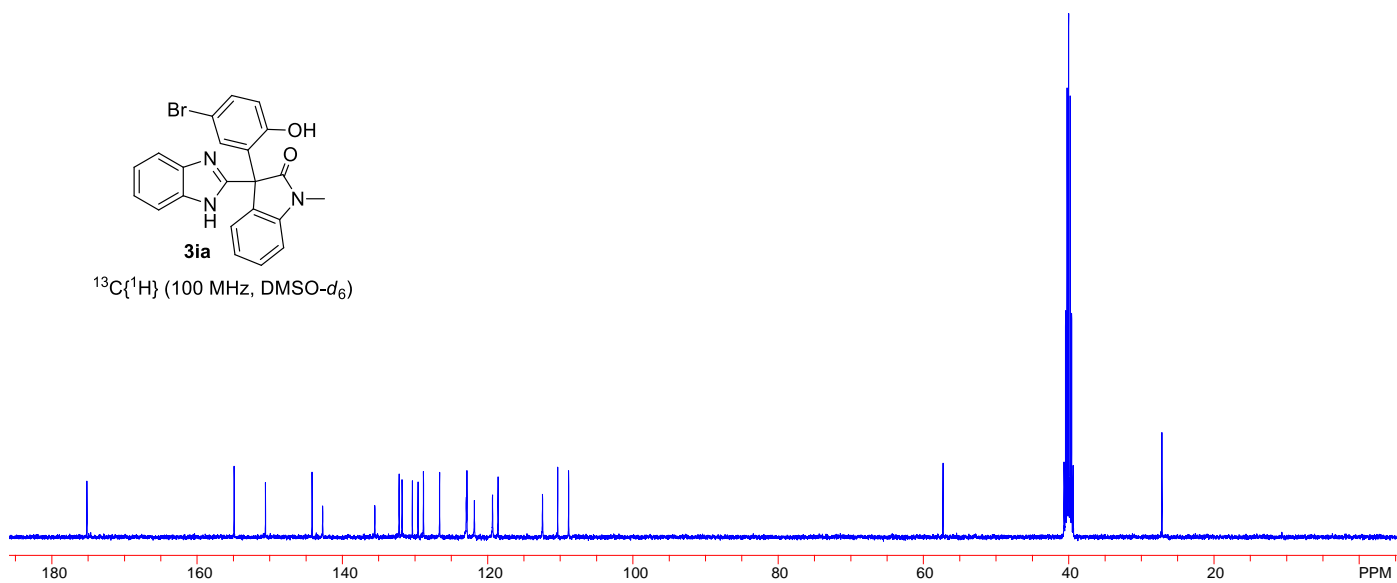



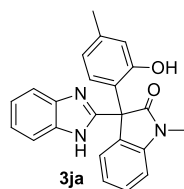

$^1\text{H NMR}$  (600 MHz,  $\text{DMSO-}d_6$ )

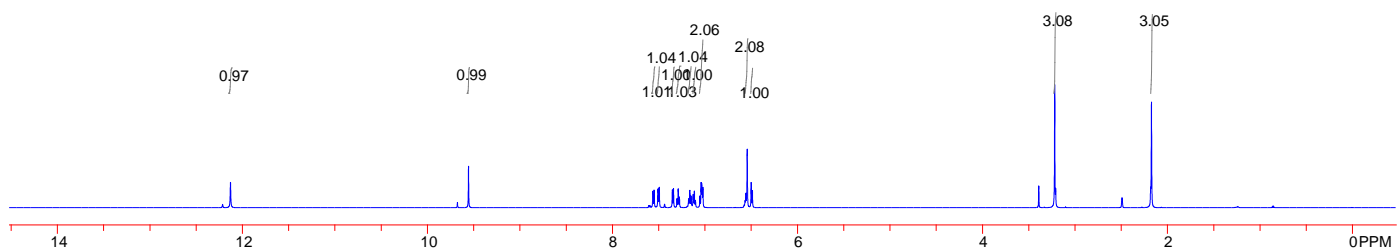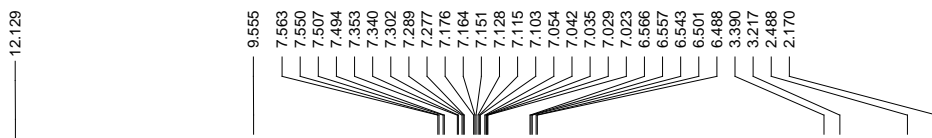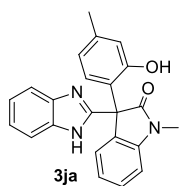

$^{13}\text{C}\{^1\text{H}\}$  (100 MHz,  $\text{DMSO-}d_6$ )

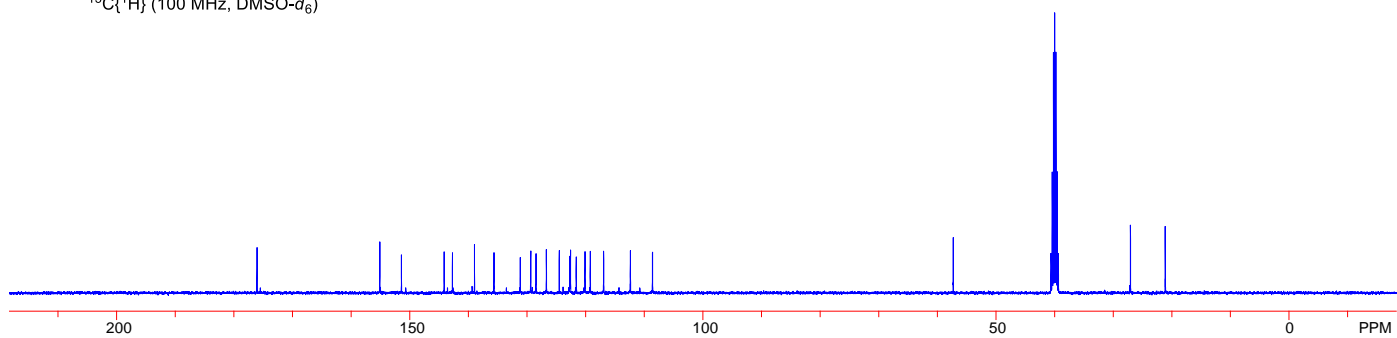

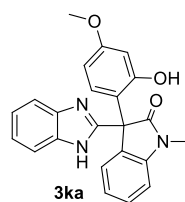

**3ka**

$^1\text{H NMR}$  (400 MHz,  $\text{DMSO-}d_6$ )

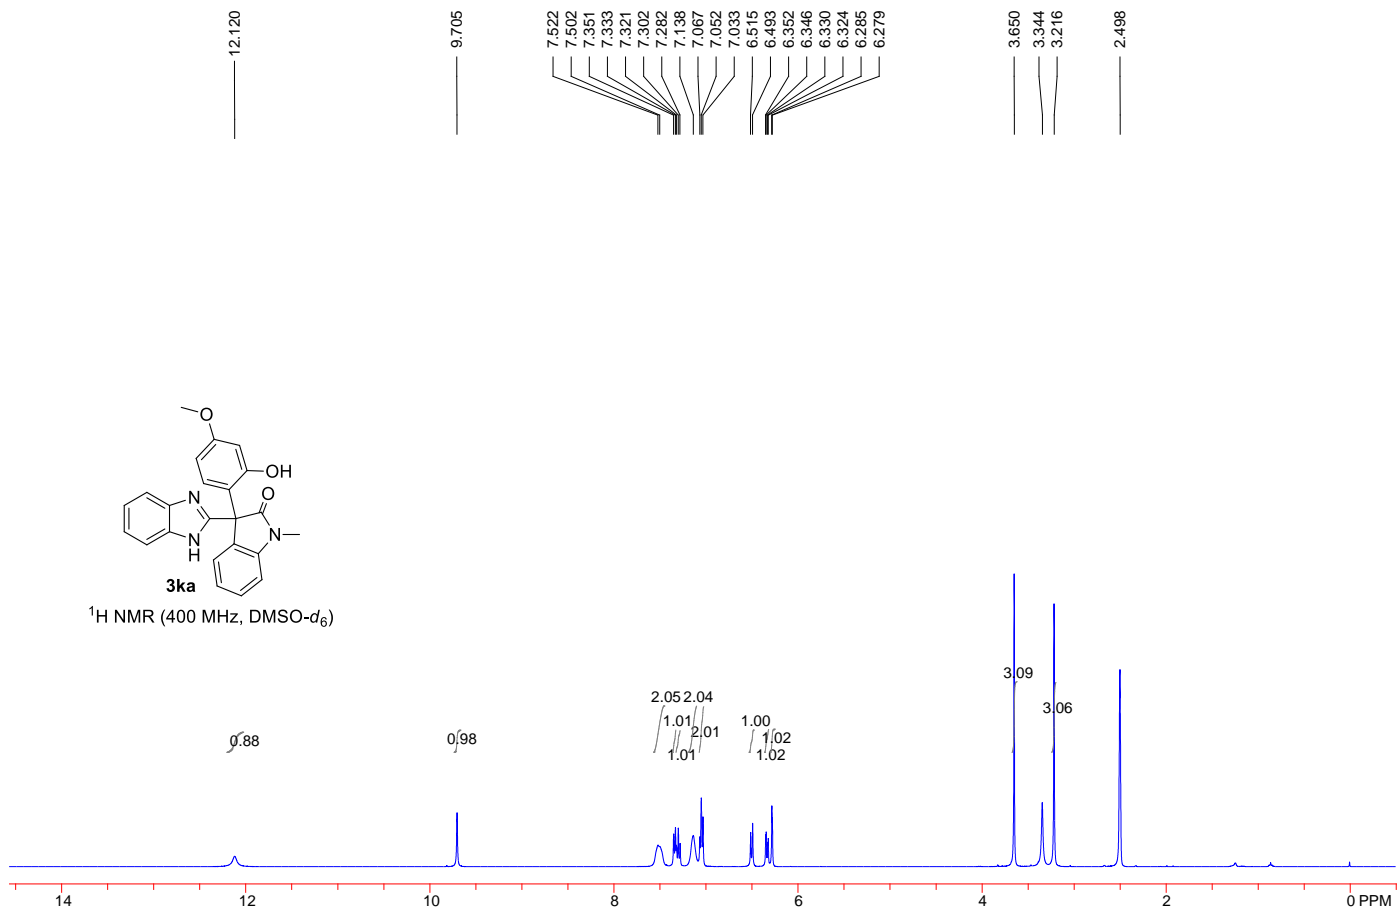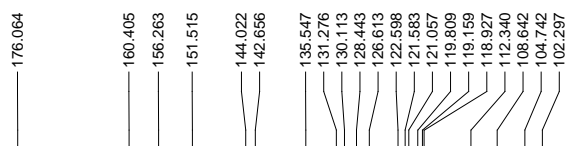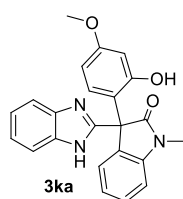

**3ka**

$^{13}\text{C}\{^1\text{H}\}$  (150 MHz,  $\text{DMSO-}d_6$ )

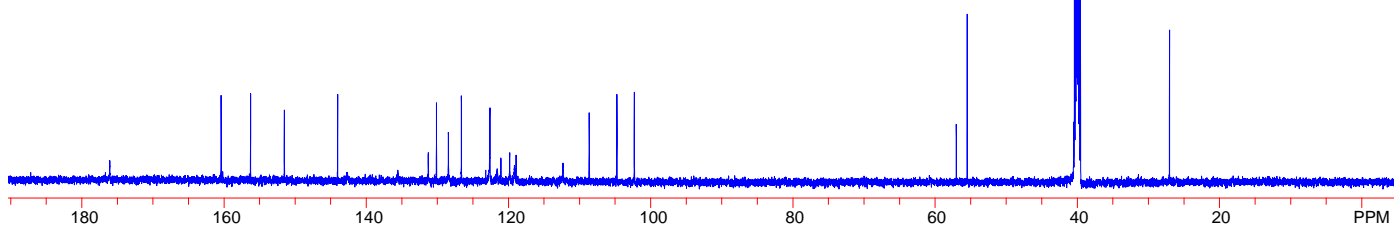

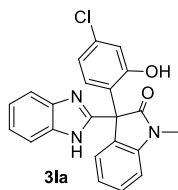

$^1\text{H NMR}$  (600 MHz,  $\text{DMSO-}d_6$ )

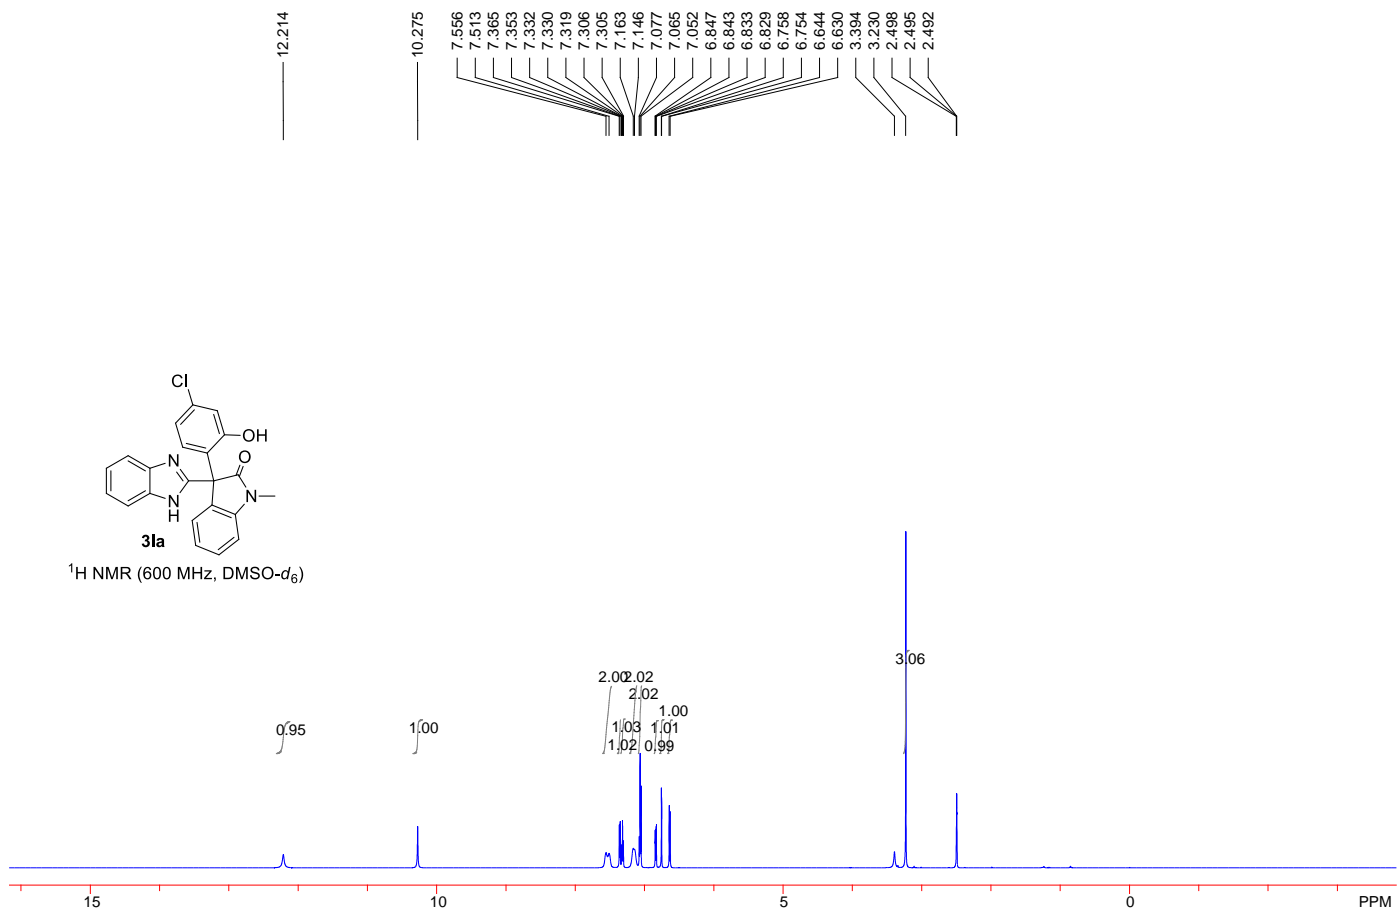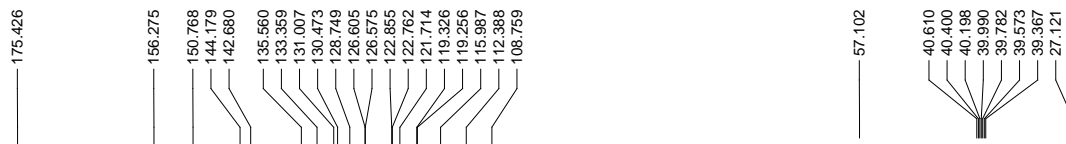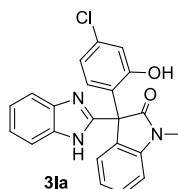

$^{13}\text{C}\{^1\text{H}\}$  (100 MHz,  $\text{DMSO-}d_6$ )

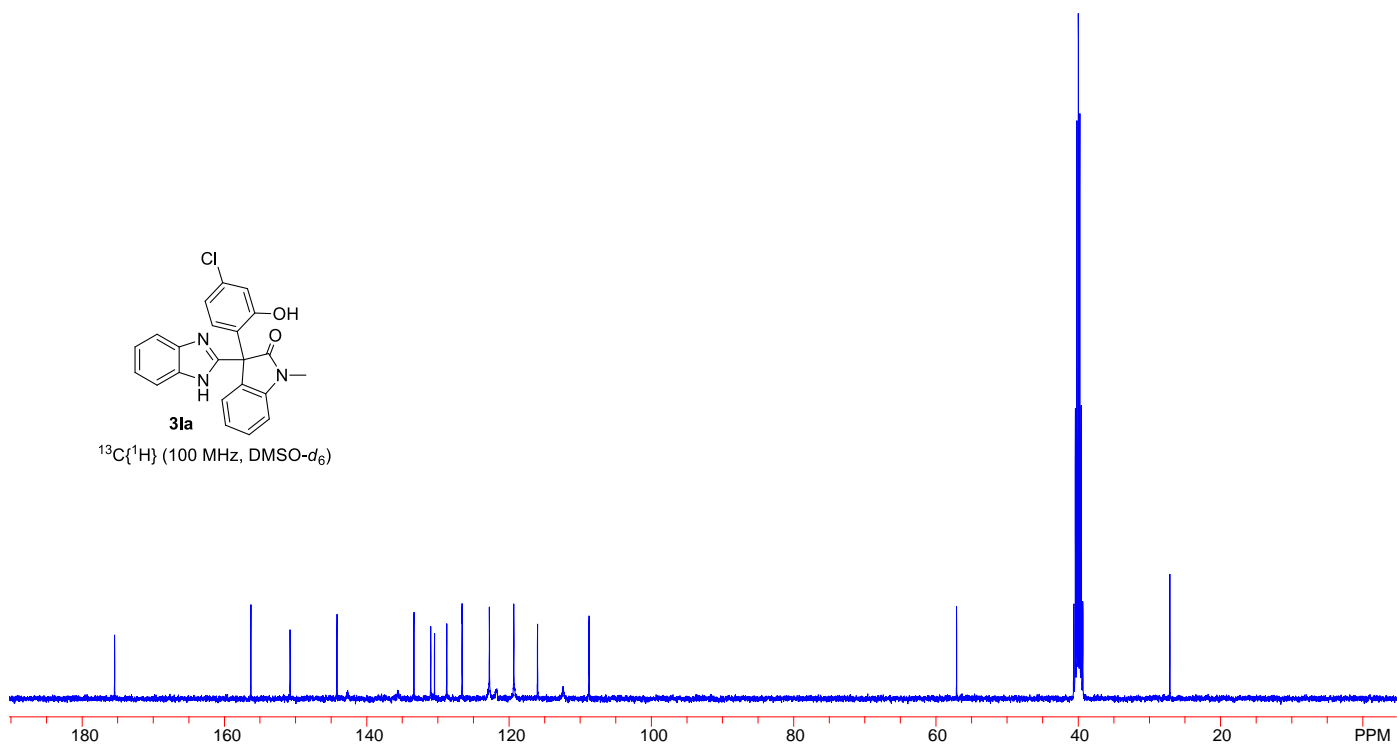

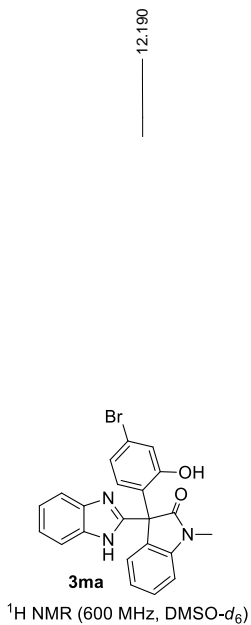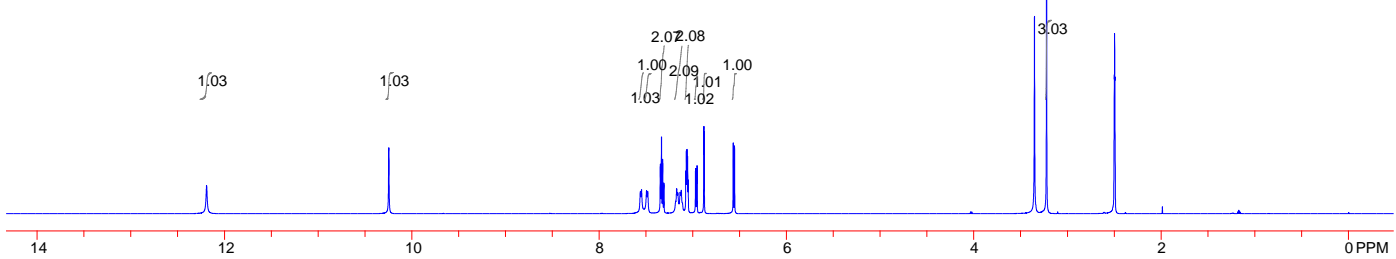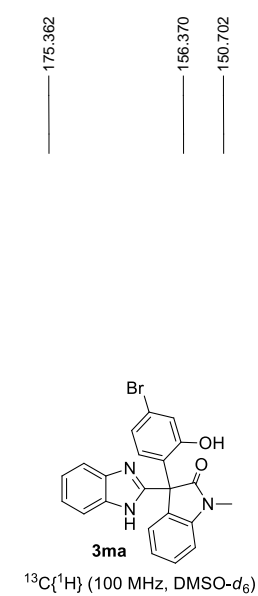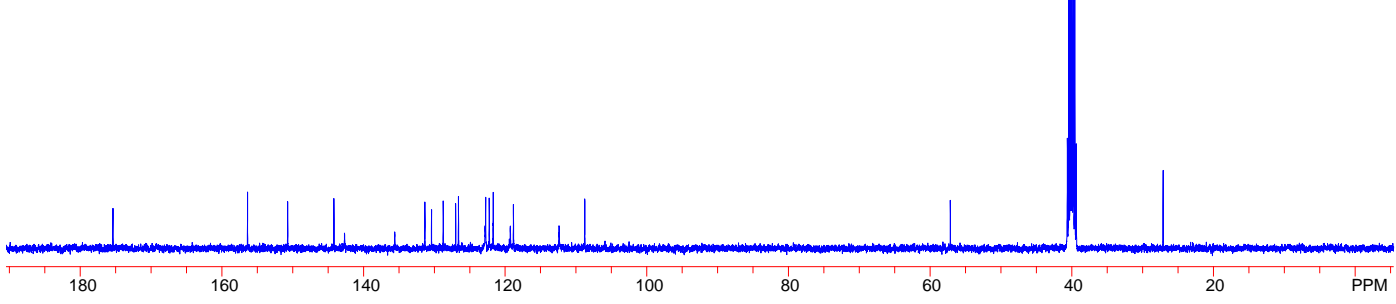

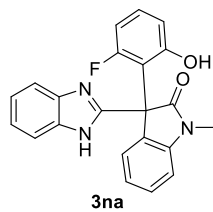

$^1\text{H}$  NMR (400 MHz,  $\text{DMSO-}d_6$ )

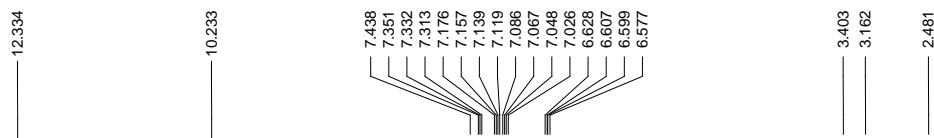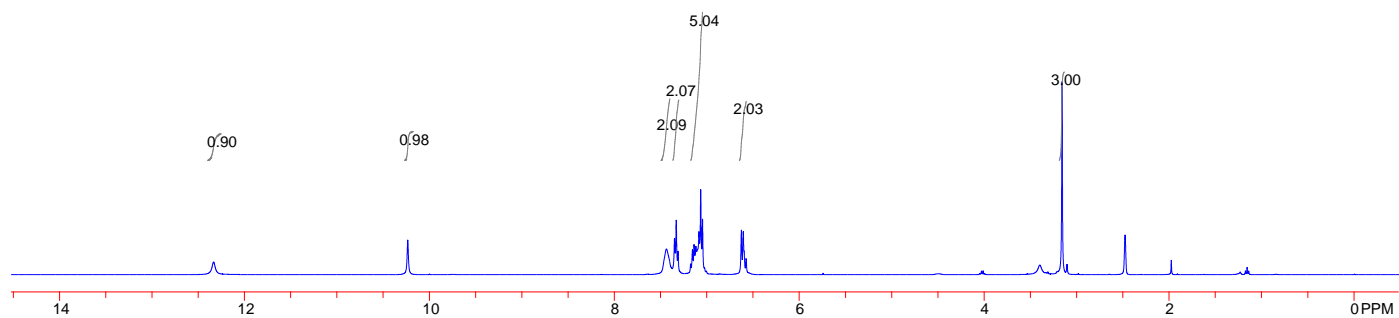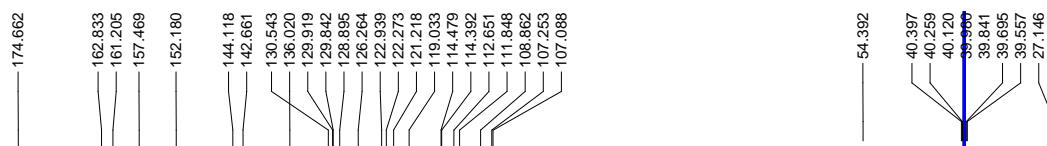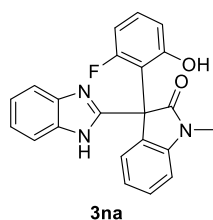

$^{13}\text{C}\{^1\text{H}\}$  (150 MHz,  $\text{DMSO-}d_6$ )

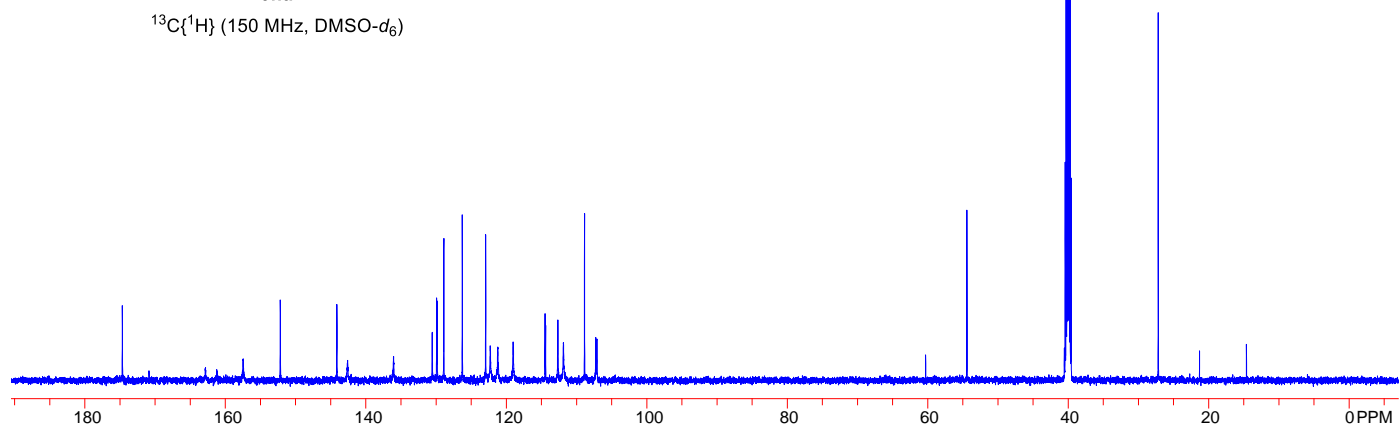

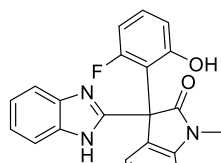

**3na**

$^{19}\text{F}$  NMR (565 MHz,  $\text{DMSO-}d_6$ )

110.275  
110.292  
110.306  
110.322

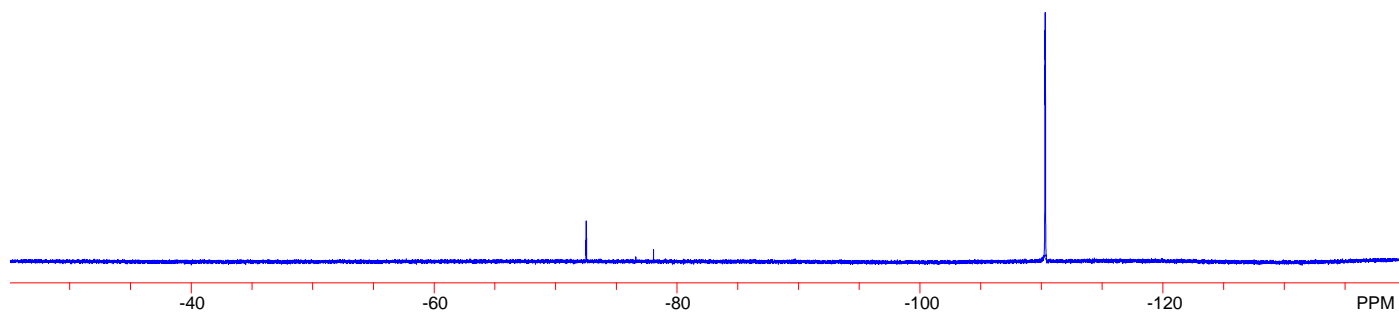

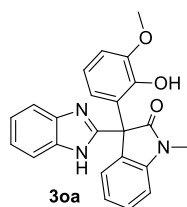

$^1\text{H NMR}$  (400 MHz,  $\text{DMSO-}d_6$ )

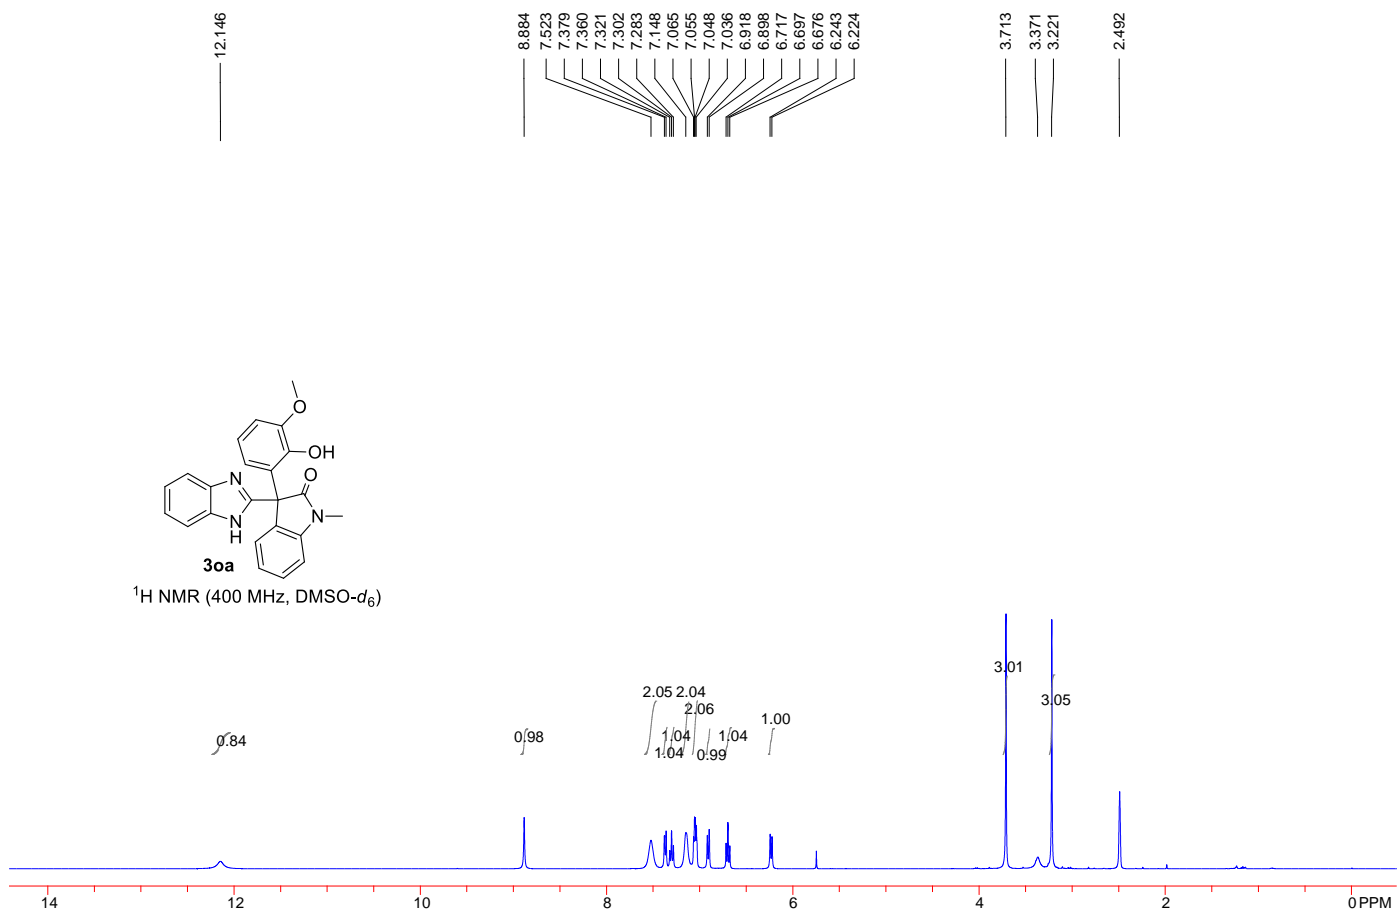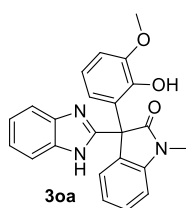

$^{13}\text{C}\{^1\text{H}\}$  (100 MHz,  $\text{DMSO-}d_6$ )

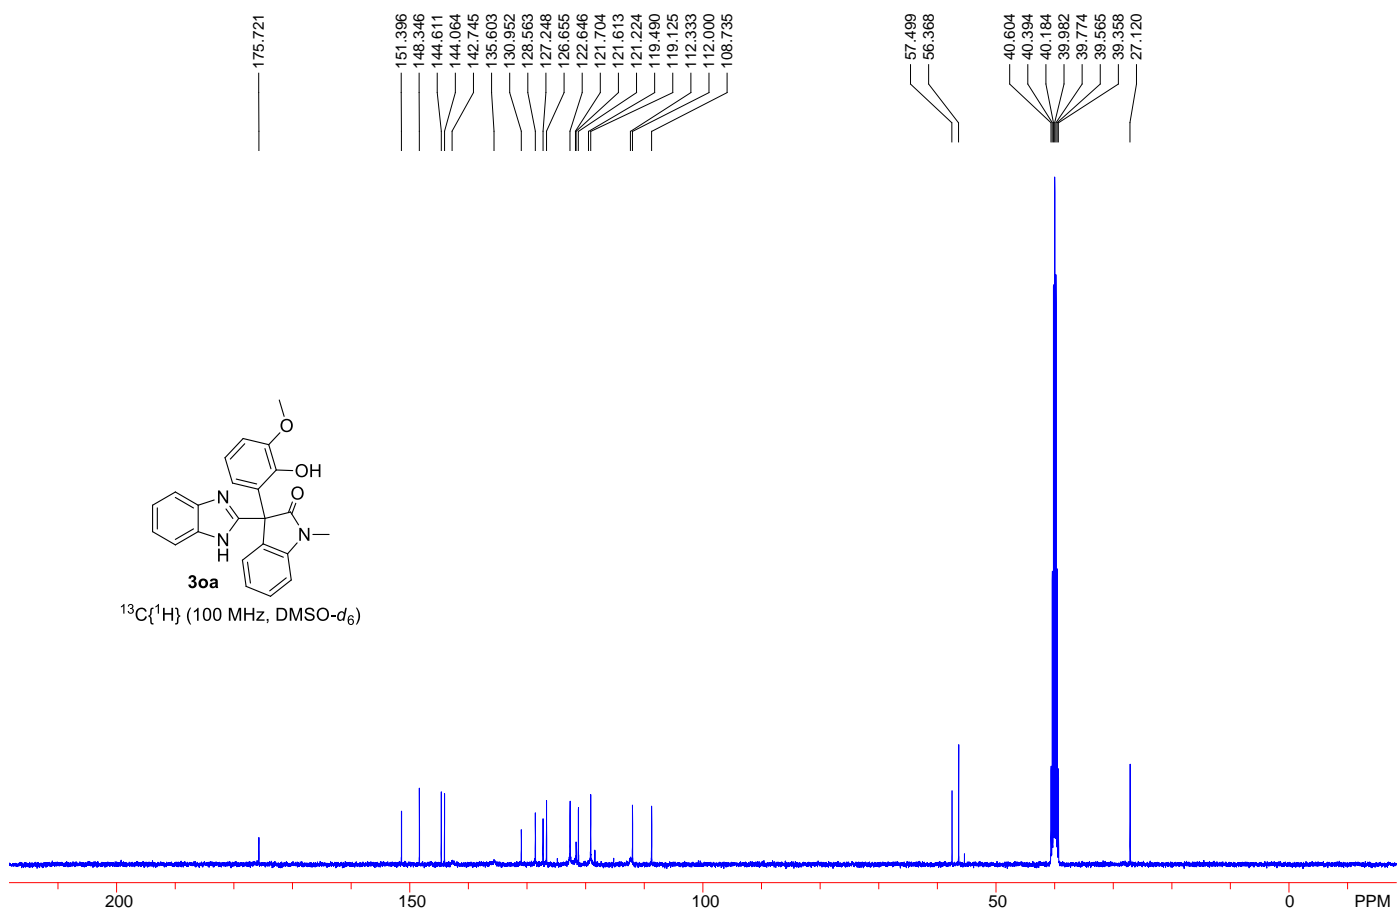

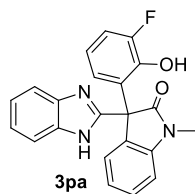

$^1\text{H NMR}$  (400 MHz,  $\text{DMSO-}d_6$ )

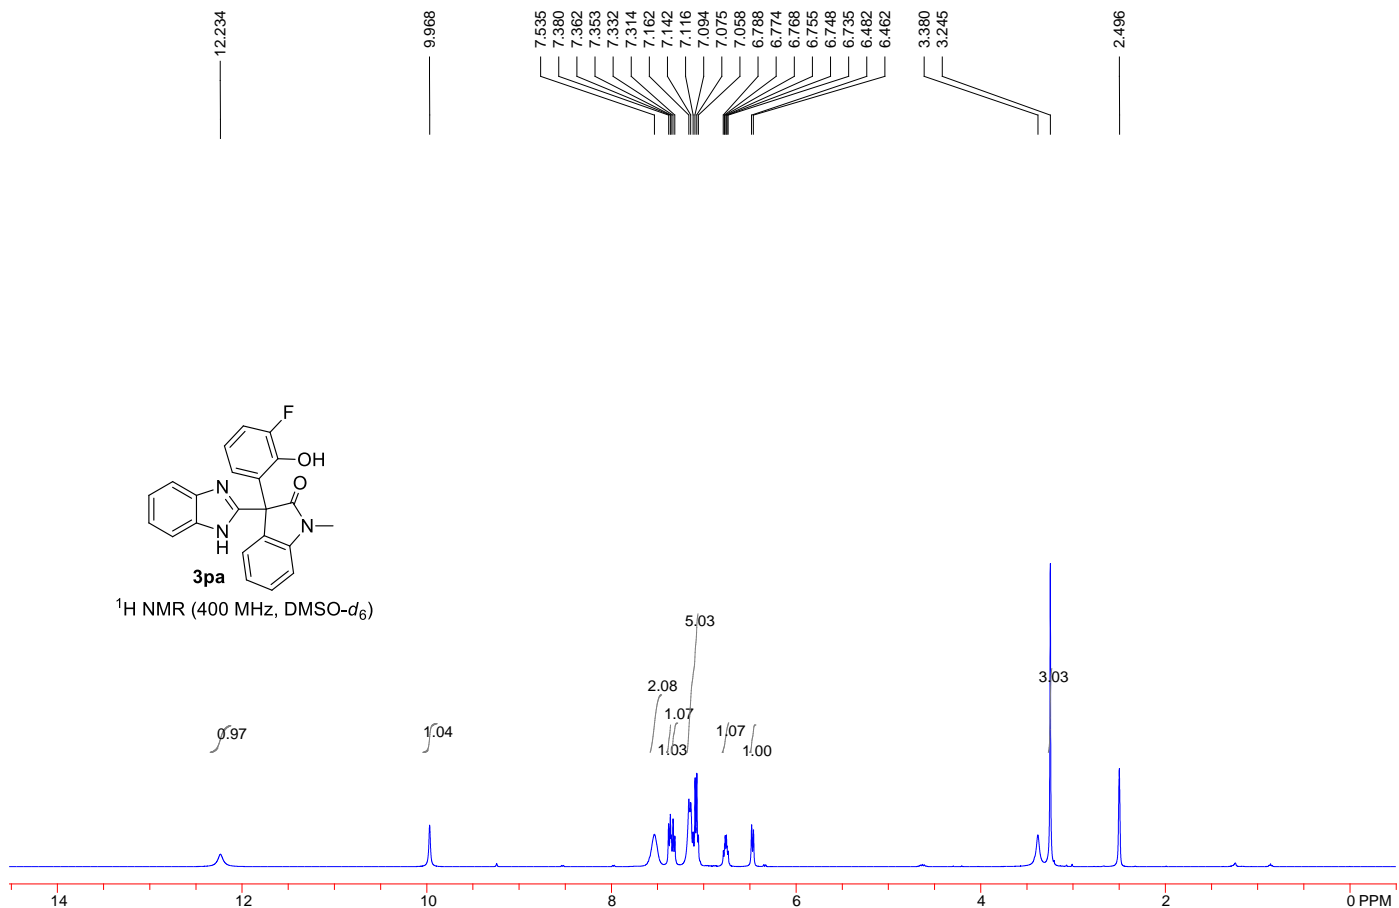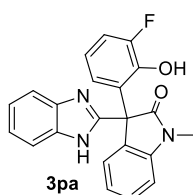

$^{13}\text{C}\{^1\text{H}\}$  (100 MHz,  $\text{DMSO-}d_6$ )

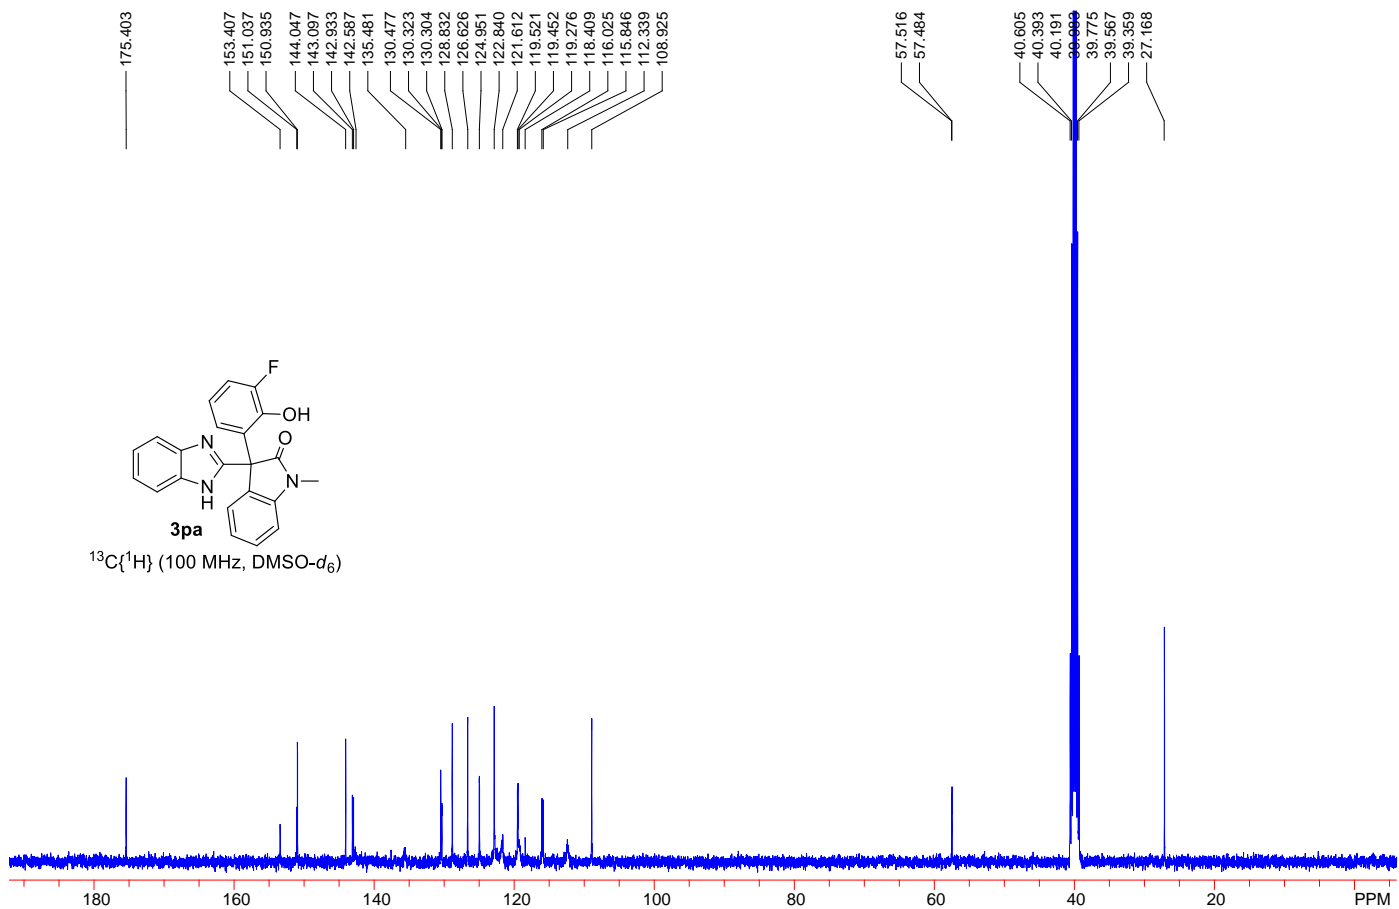



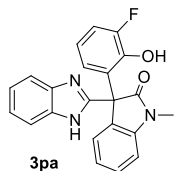

<sup>19</sup>F NMR (376 MHz, DMSO-*d*<sub>6</sub>)

135.300  
135.314  
135.330  
135.340

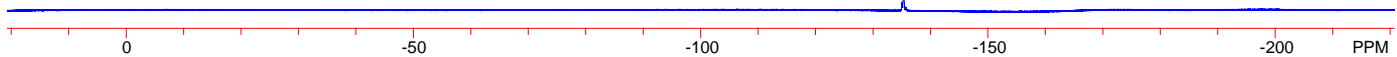

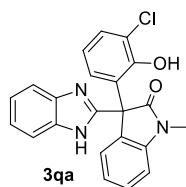

$^1\text{H NMR}$  (400 MHz,  $\text{DMSO-}d_6$ )

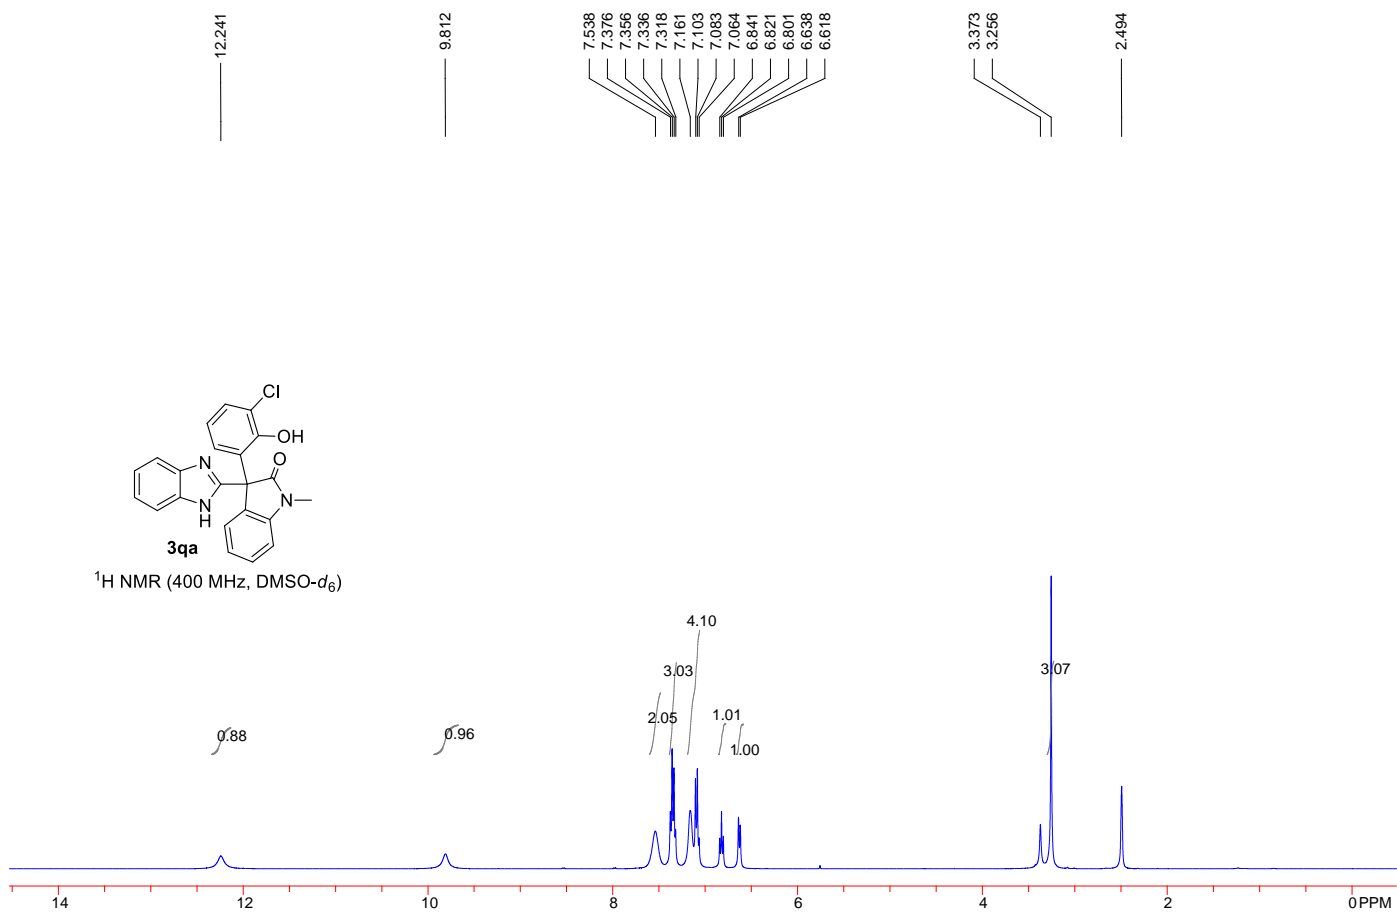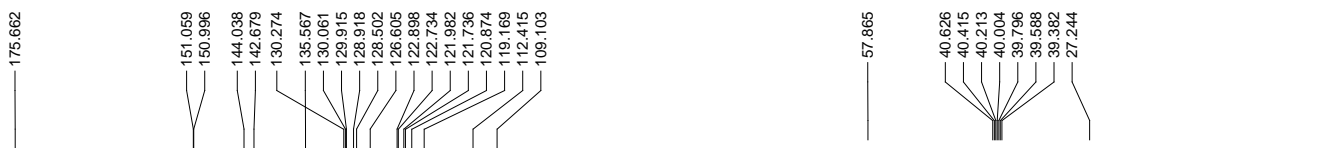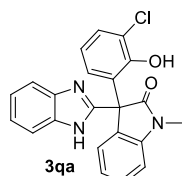

$^{13}\text{C}\{^1\text{H}\}$  (100 MHz,  $\text{DMSO-}d_6$ )

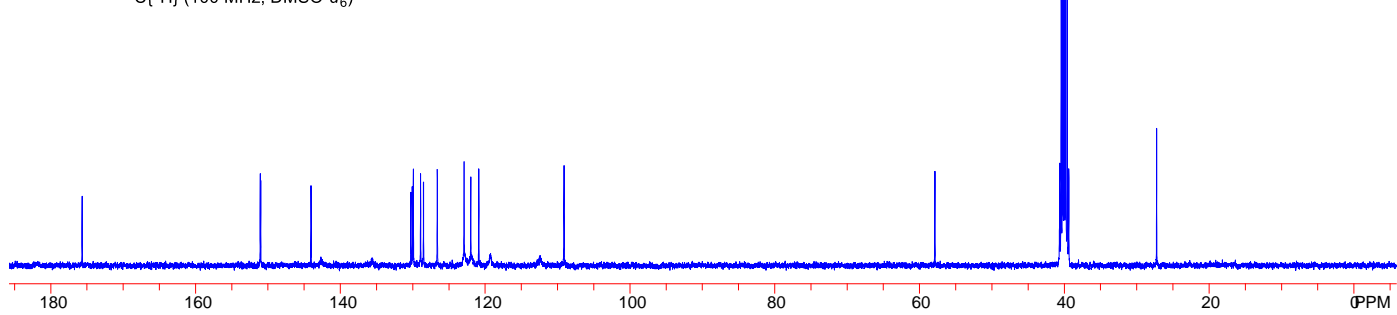

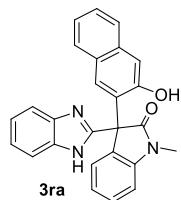

$^1\text{H NMR}$  (600 MHz,  $\text{DMSO-}d_6$ )

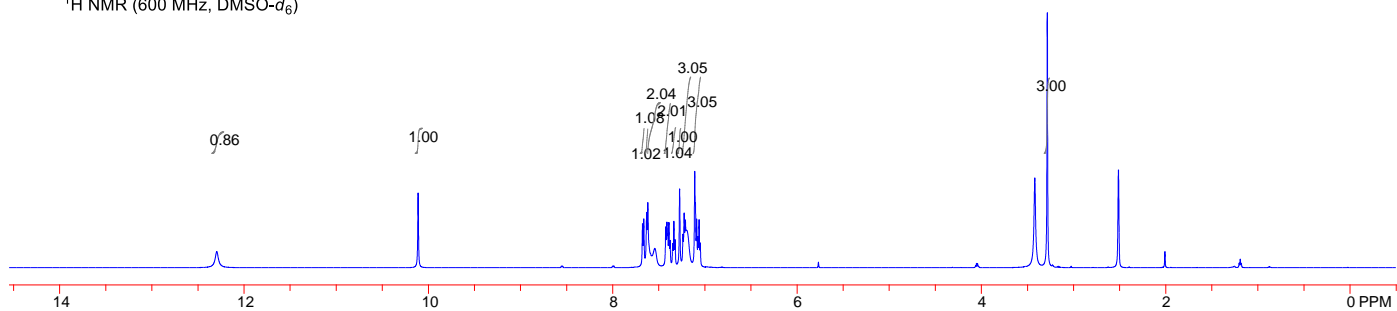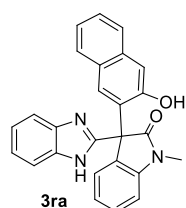

$^{13}\text{C}\{^1\text{H}\}$  (150 MHz,  $\text{DMSO-}d_6$ )

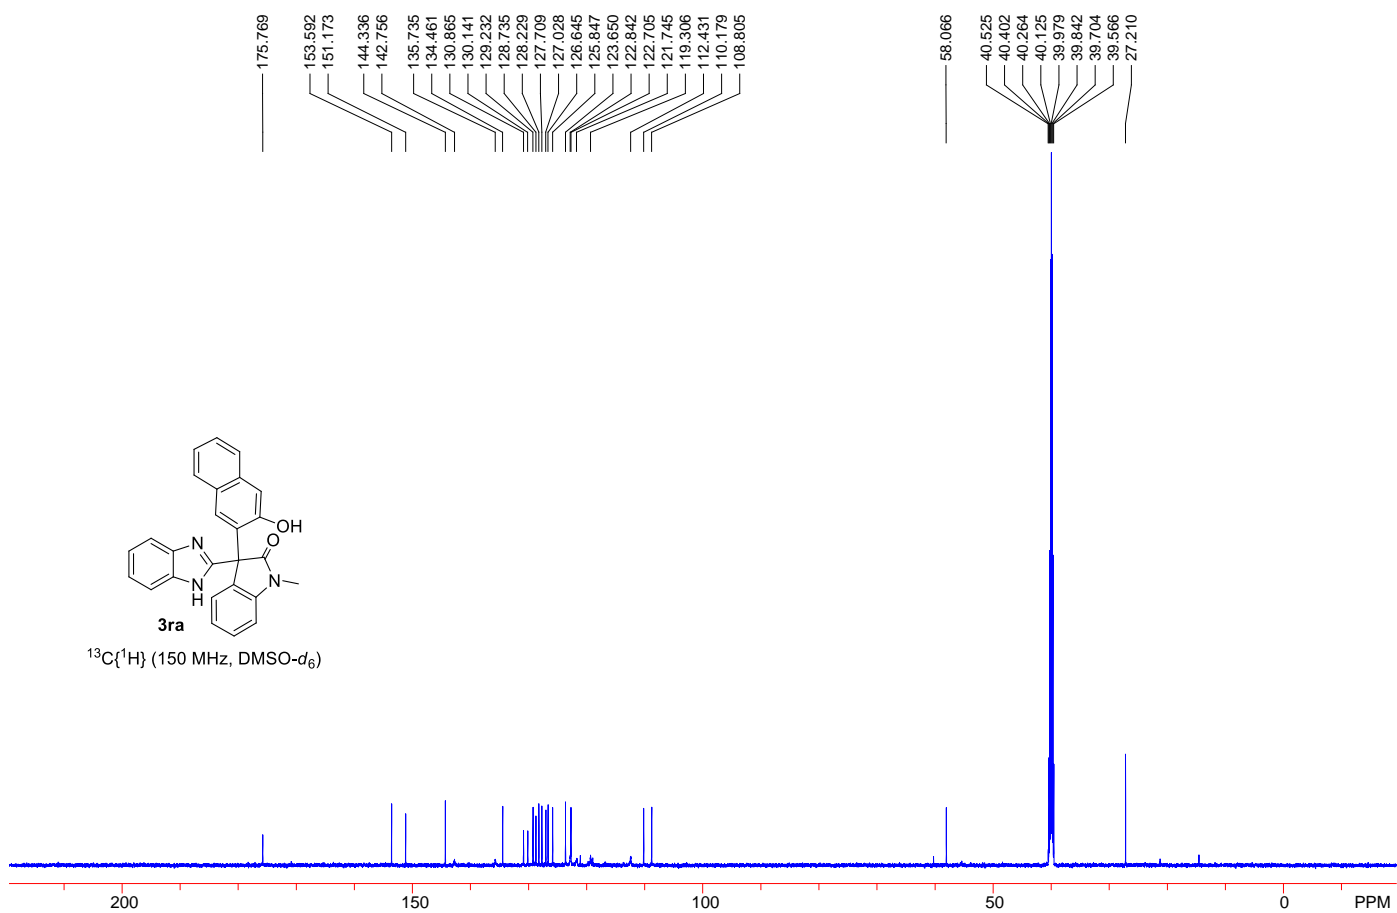

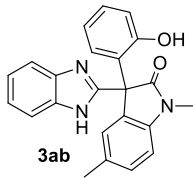

$^1\text{H NMR}$  (600 MHz,  $\text{DMSO-}d_6$ )

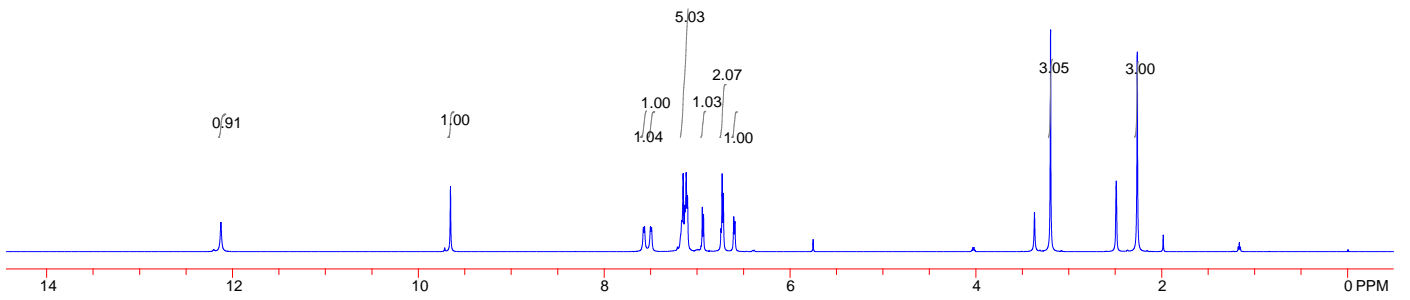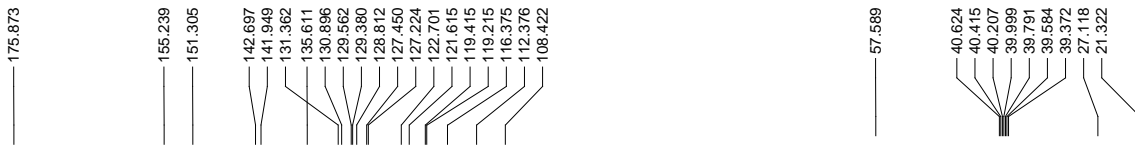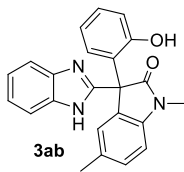

$^{13}\text{C}\{^1\text{H}\}$  (100 MHz,  $\text{DMSO-}d_6$ )

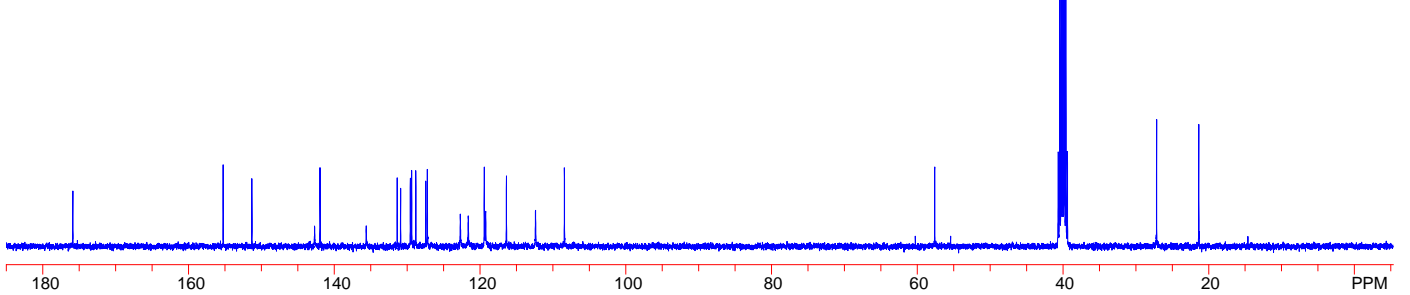

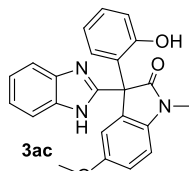

$^1\text{H NMR}$  (400 MHz,  $\text{DMSO-}d_6$ )

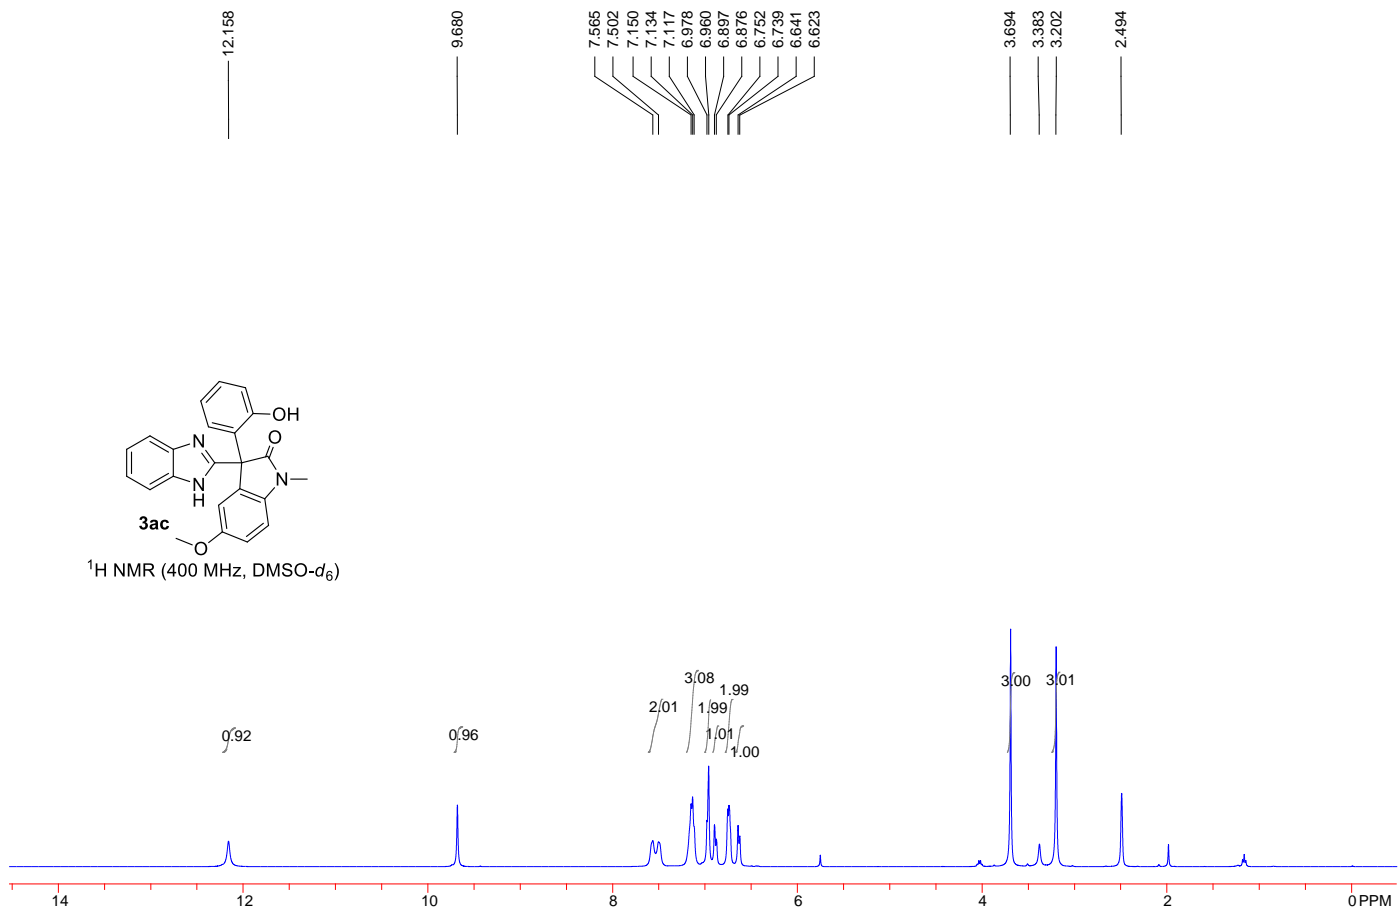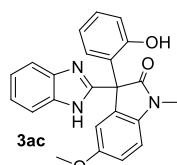

$^{13}\text{C}\{^1\text{H}\}$  (100 MHz,  $\text{DMSO-}d_6$ )

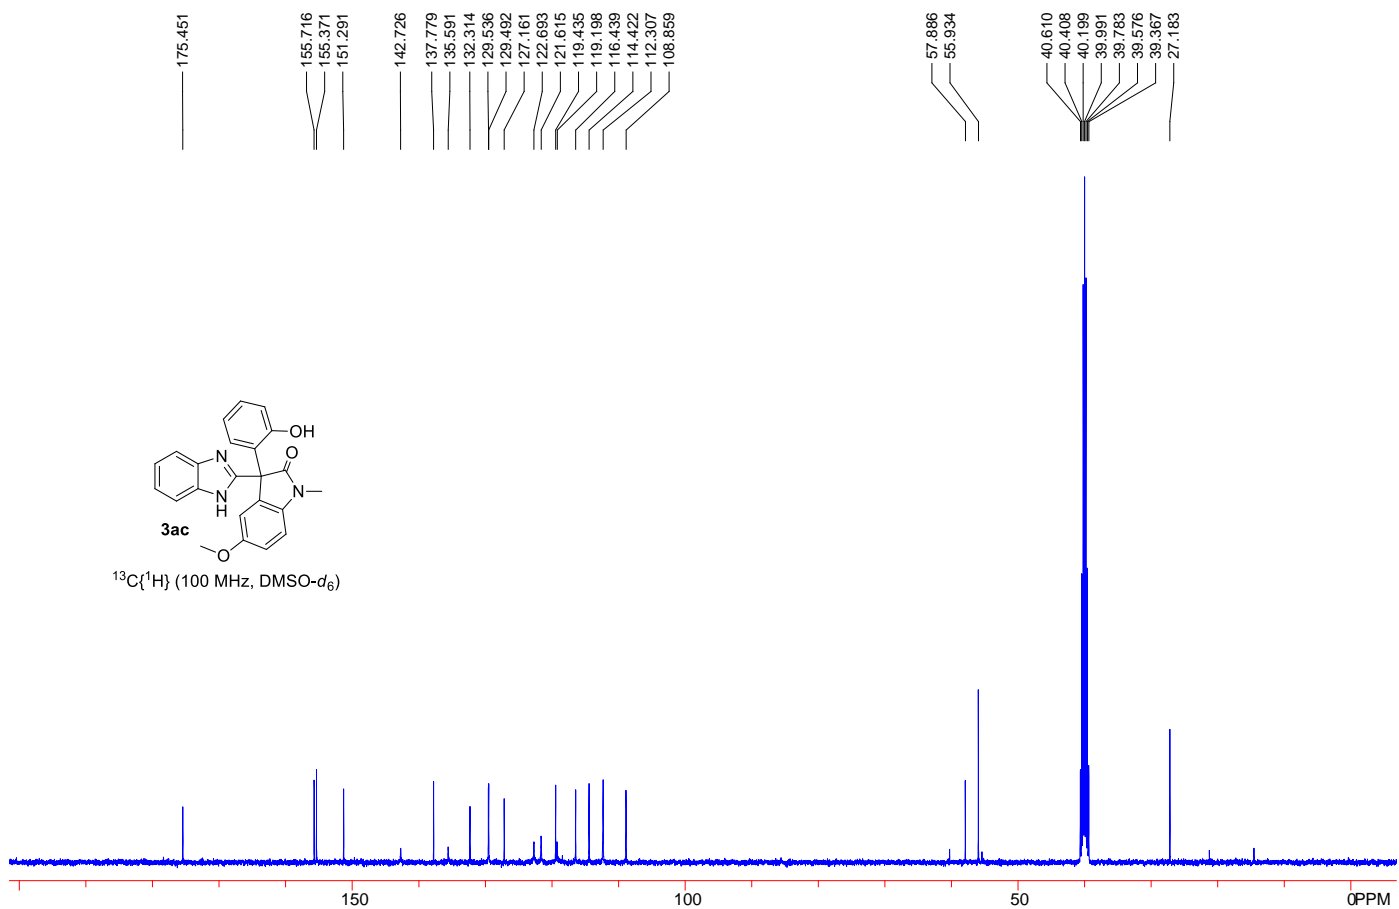

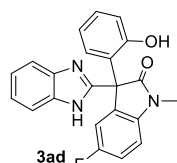

<sup>1</sup>H NMR (400 MHz, DMSO-*d*<sub>6</sub>)

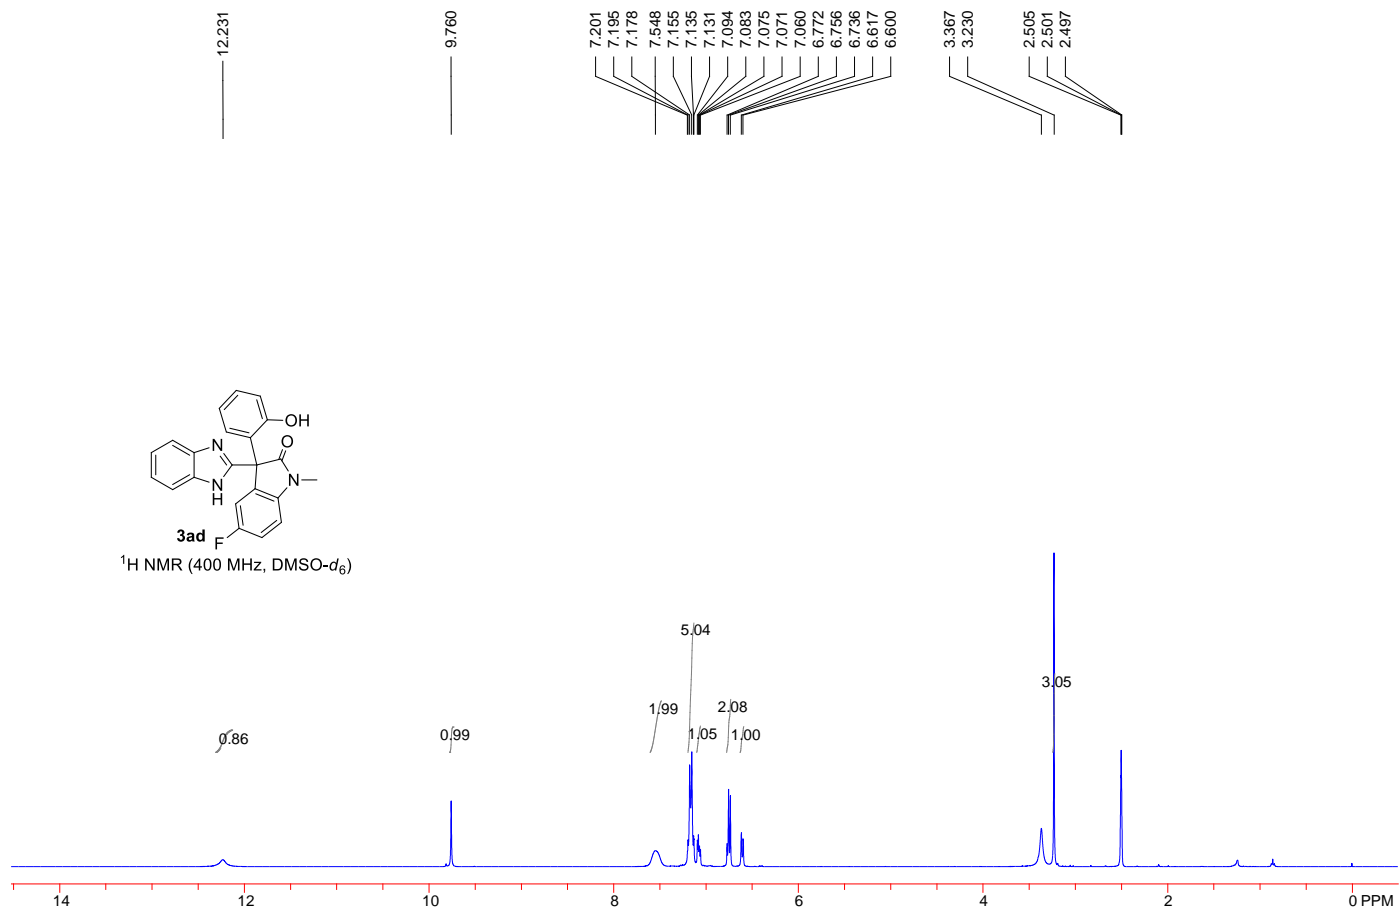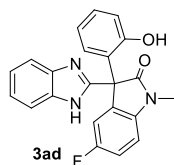

<sup>13</sup>C{<sup>1</sup>H} (150 MHz, DMSO-*d*<sub>6</sub>)

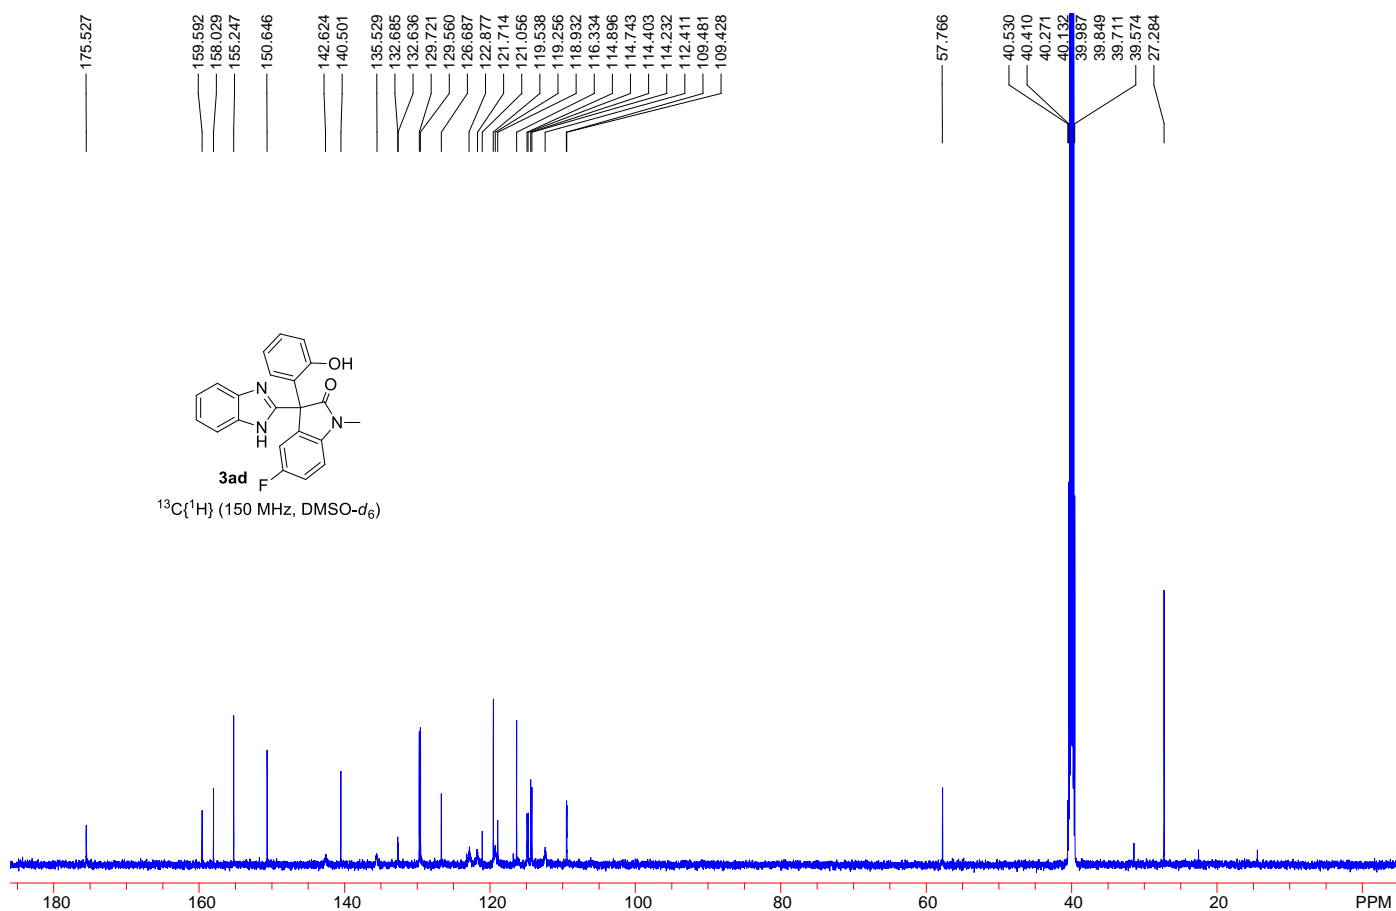

113.079  
113.105  
113.120  
113.142

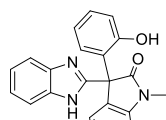

**3ad**  
<sup>19</sup>F NMR (376 MHz, DMSO-d<sub>6</sub>)

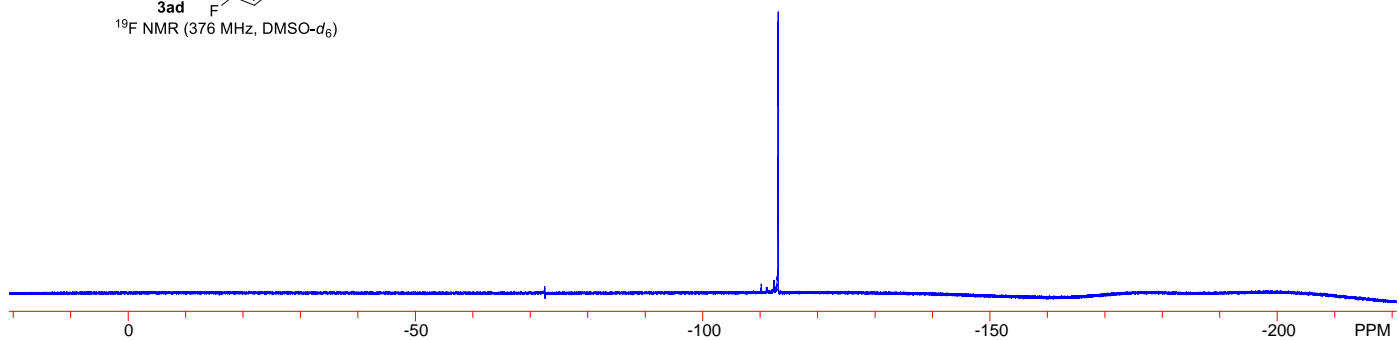

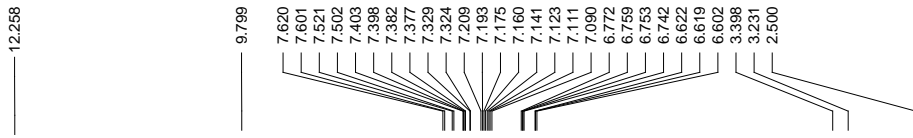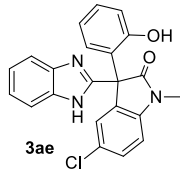

$^1\text{H NMR}$  (400 MHz,  $\text{DMSO-}d_6$ )

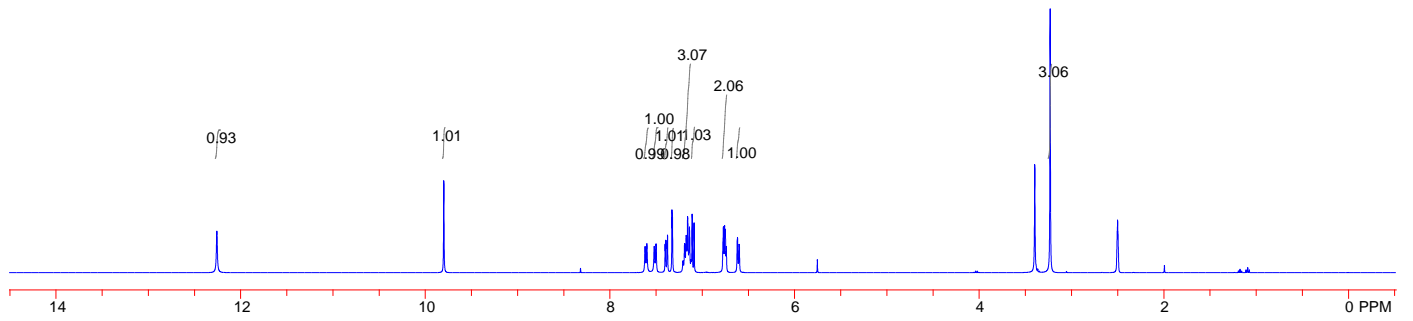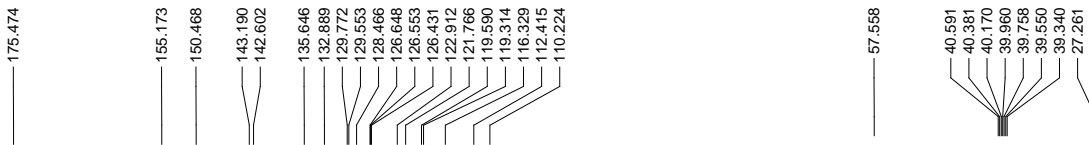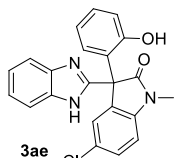

$^{13}\text{C}\{^1\text{H}\}$  (100 MHz,  $\text{DMSO-}d_6$ )

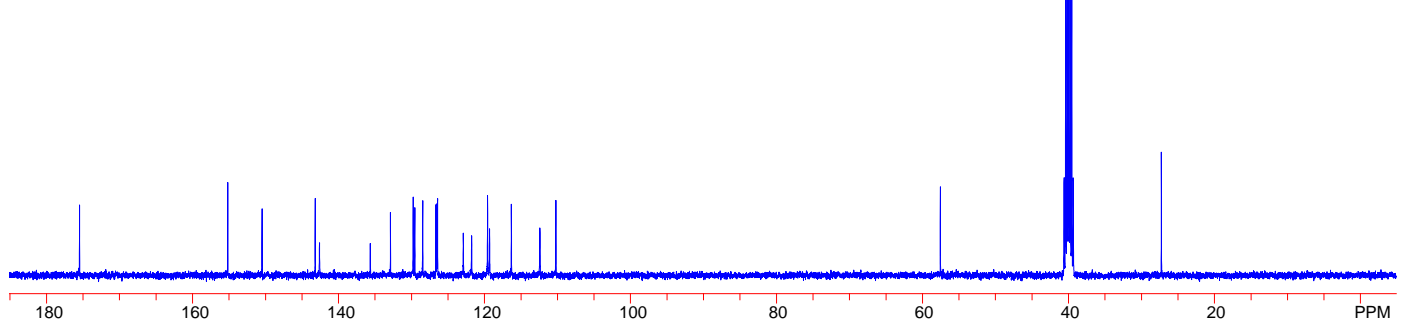



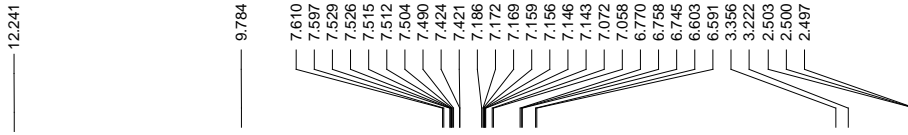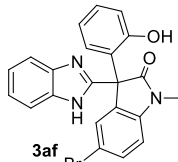

$^1\text{H}$  NMR (600 MHz,  $\text{DMSO-}d_6$ )

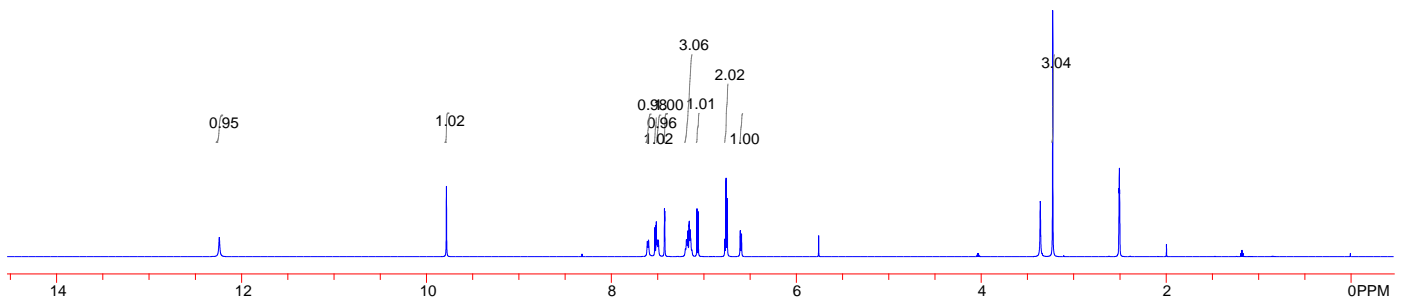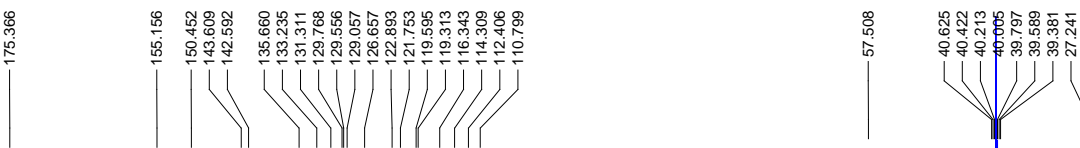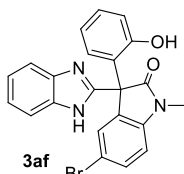

$^{13}\text{C}\{^1\text{H}\}$  (100 MHz,  $\text{DMSO-}d_6$ )

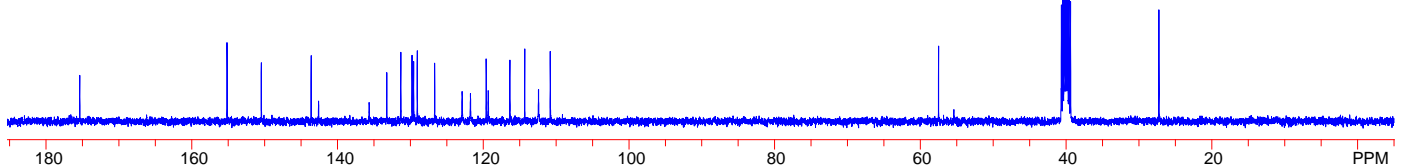

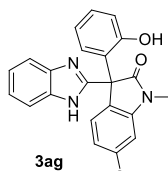

$^1\text{H NMR}$  (600 MHz,  $\text{DMSO-}d_6$ )

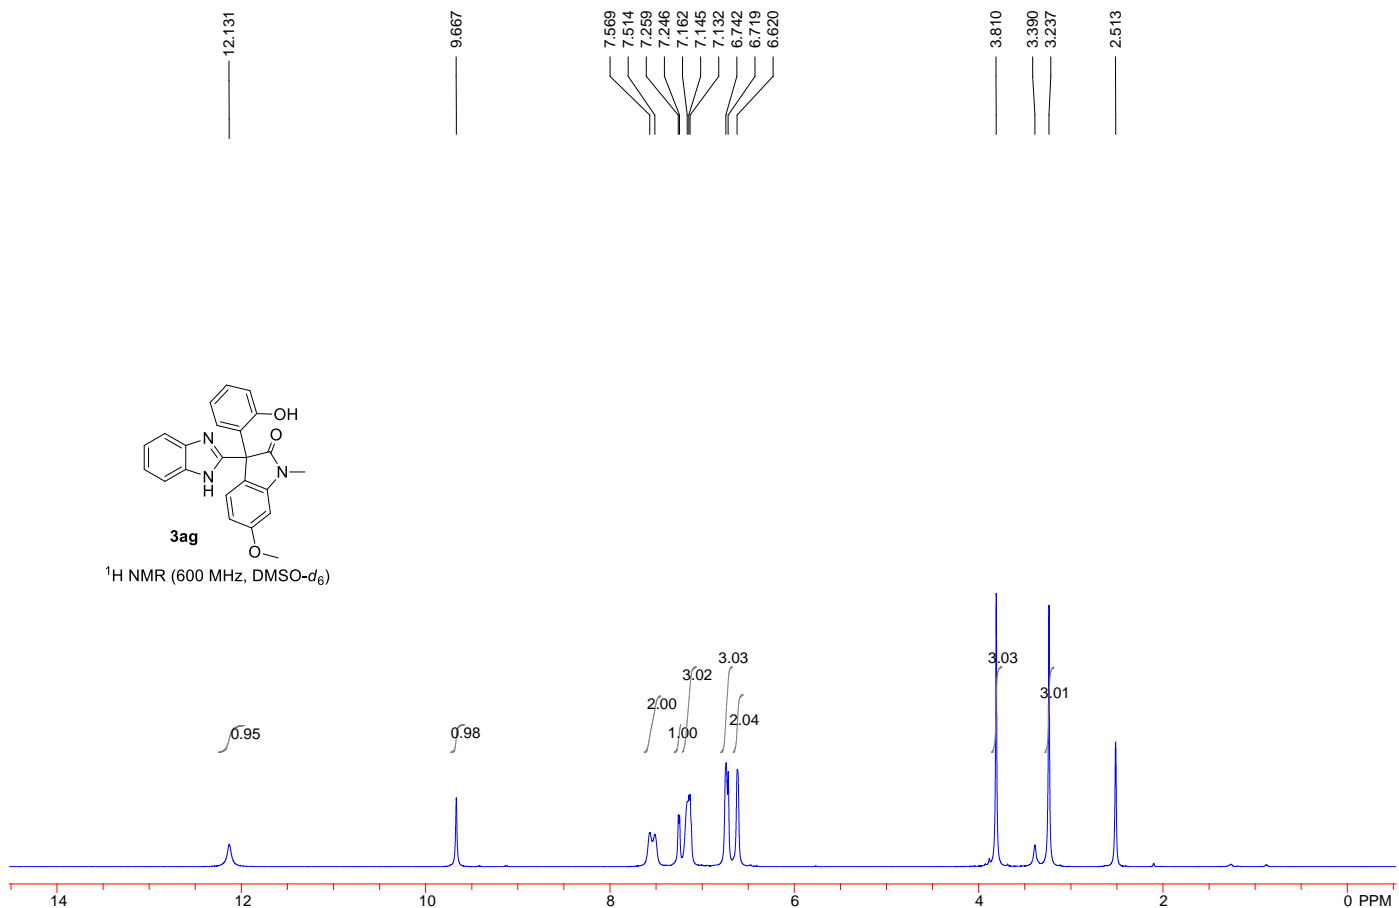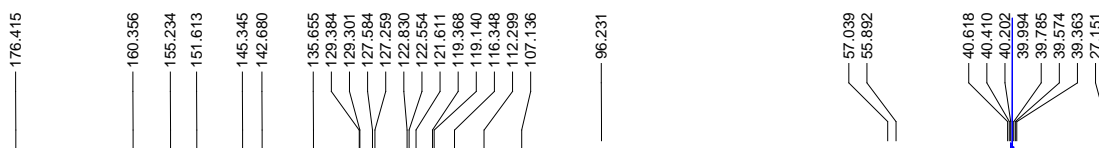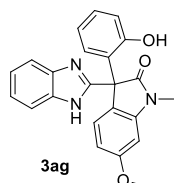

$^{13}\text{C}\{^1\text{H}\}$  (100 MHz,  $\text{DMSO-}d_6$ )

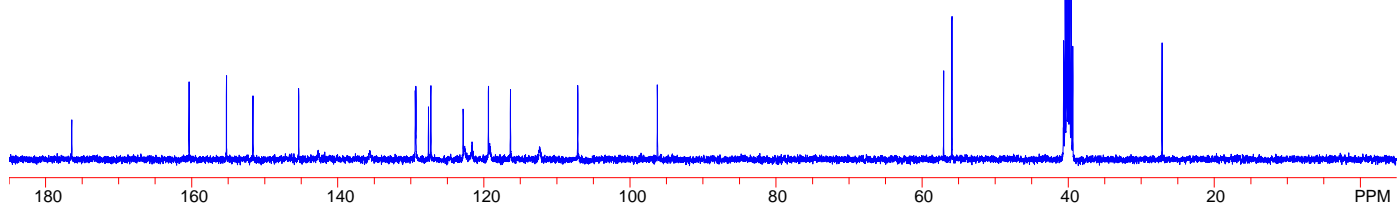

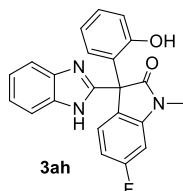

$^1\text{H NMR}$  (400 MHz,  $\text{DMSO-}d_6$ )

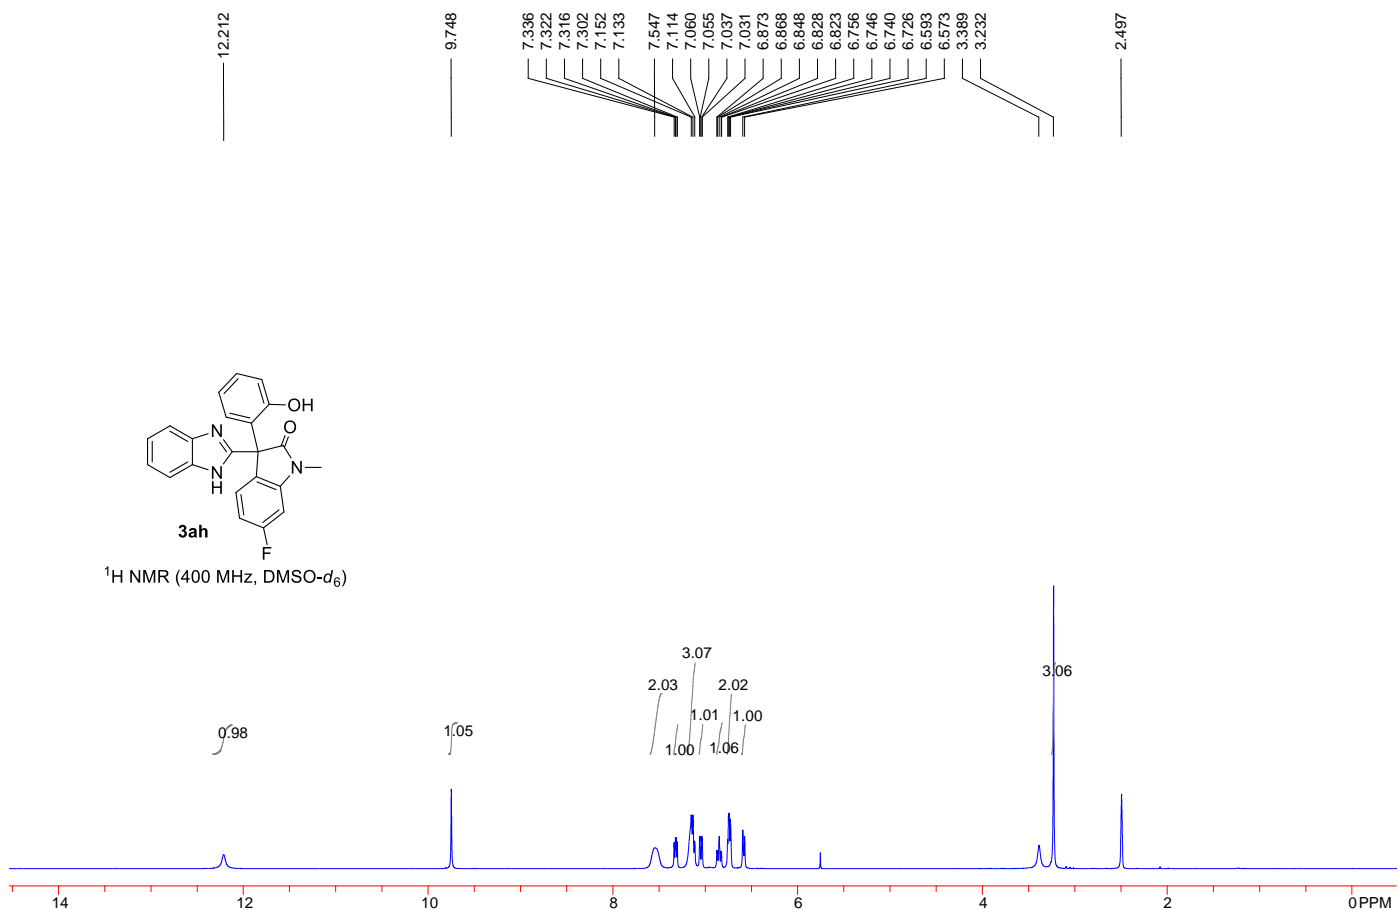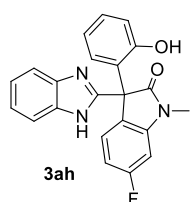

$^{13}\text{C}\{^1\text{H}\}$  (150 MHz,  $\text{DMSO-}d_6$ )

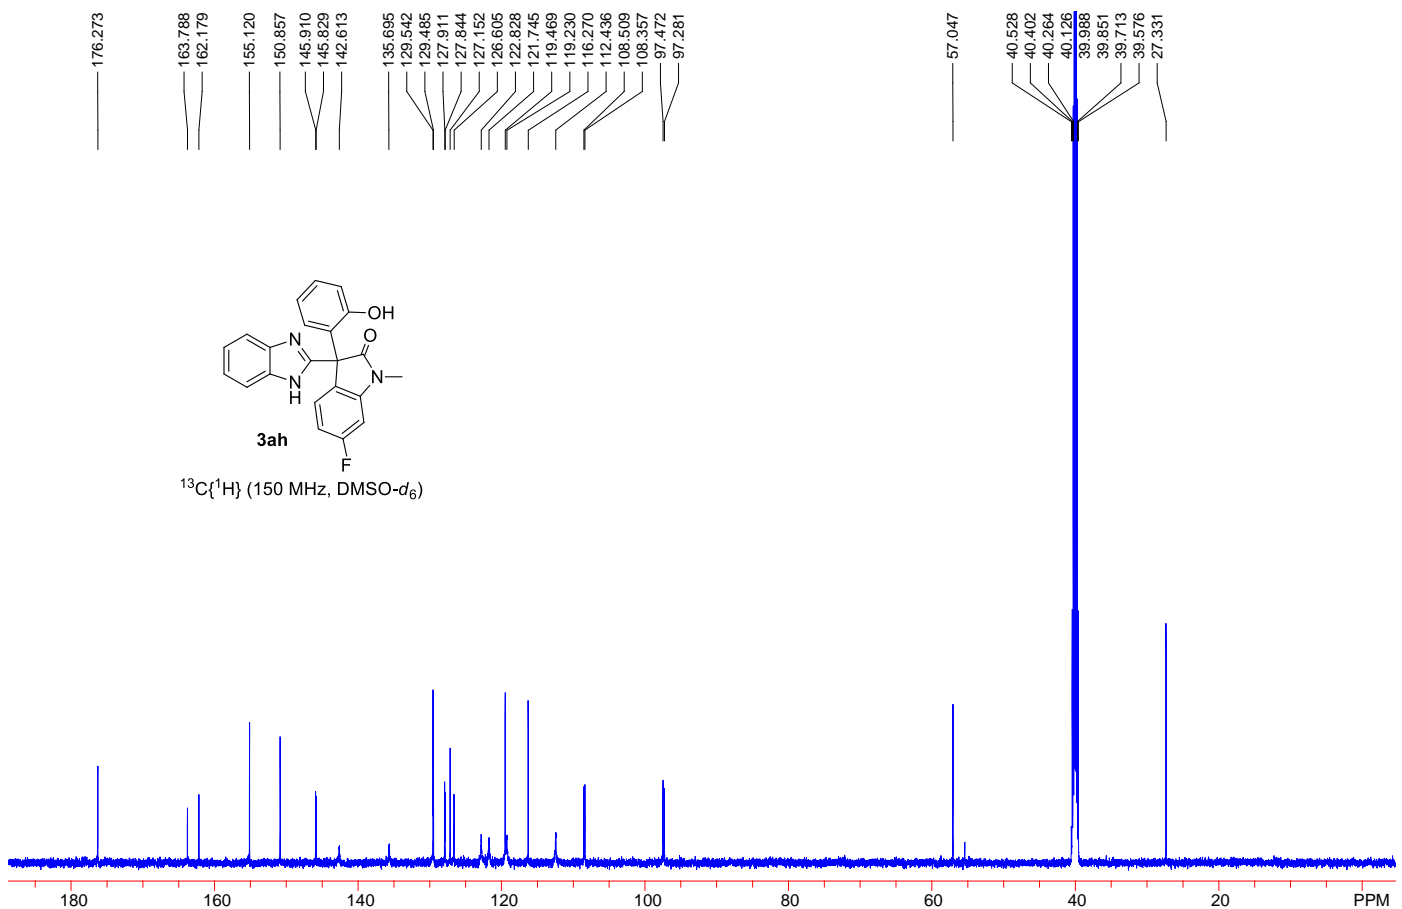

113.083  
113.118  
113.133  
113.159

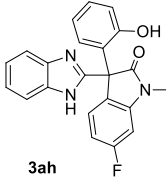

<sup>19</sup>F NMR (376 MHz, DMSO-*d*<sub>6</sub>)

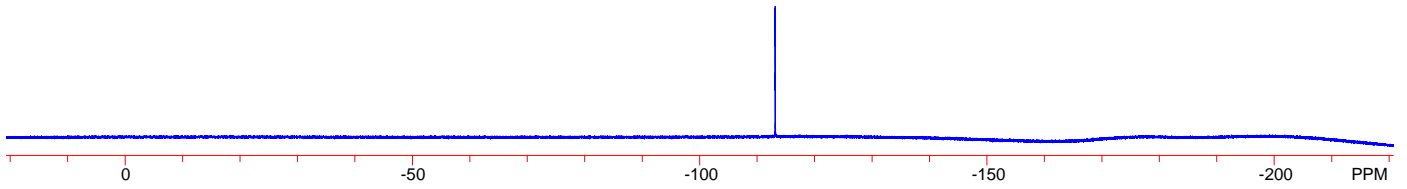

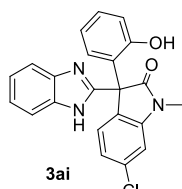

$^1\text{H NMR}$  (400 MHz,  $\text{DMSO-}d_6$ )

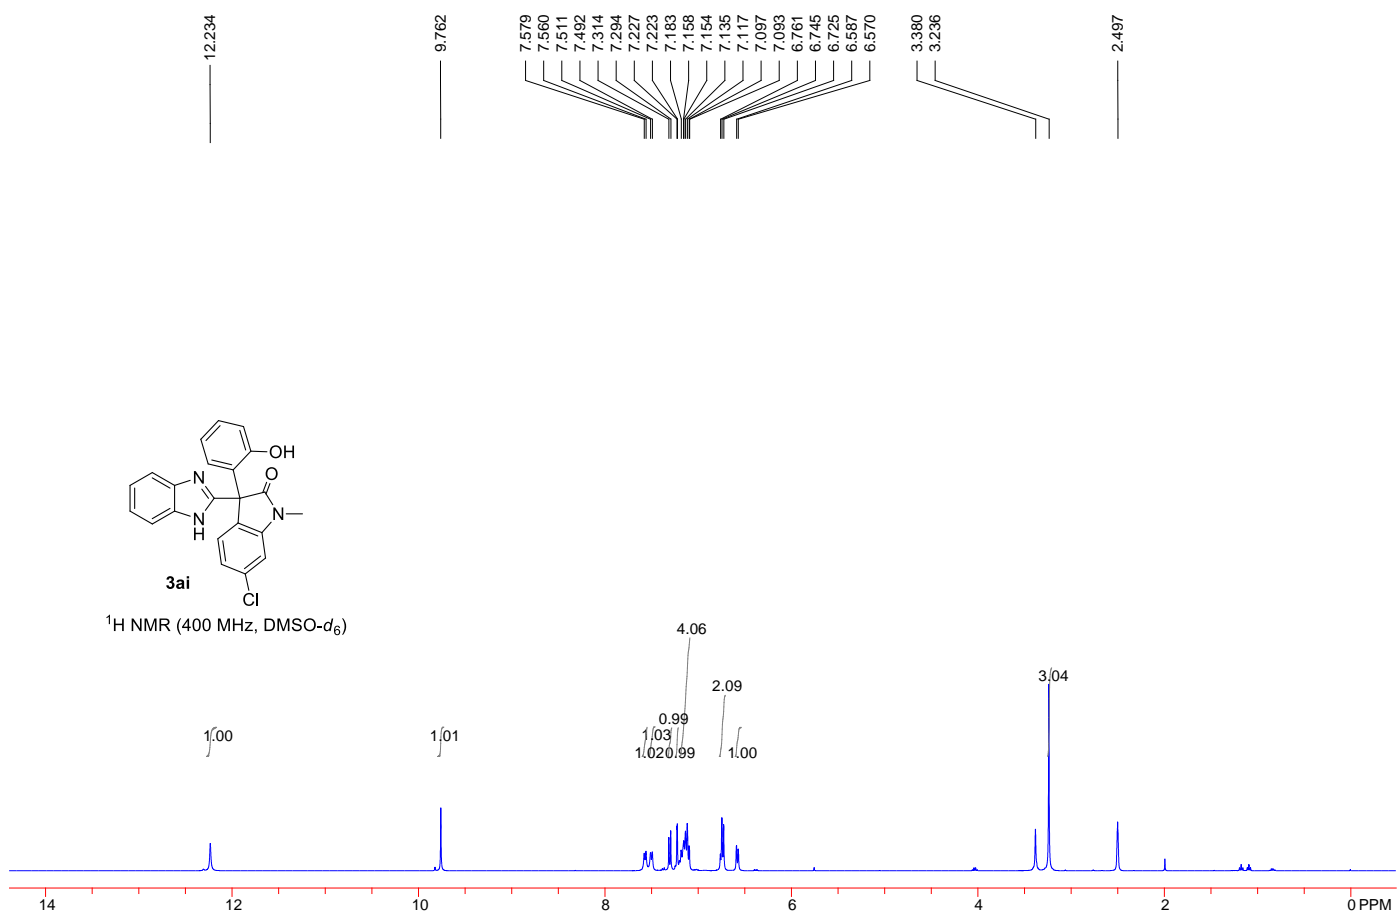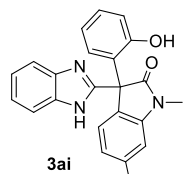

$^{13}\text{C}\{^1\text{H}\}$  (100 MHz,  $\text{DMSO-}d_6$ )

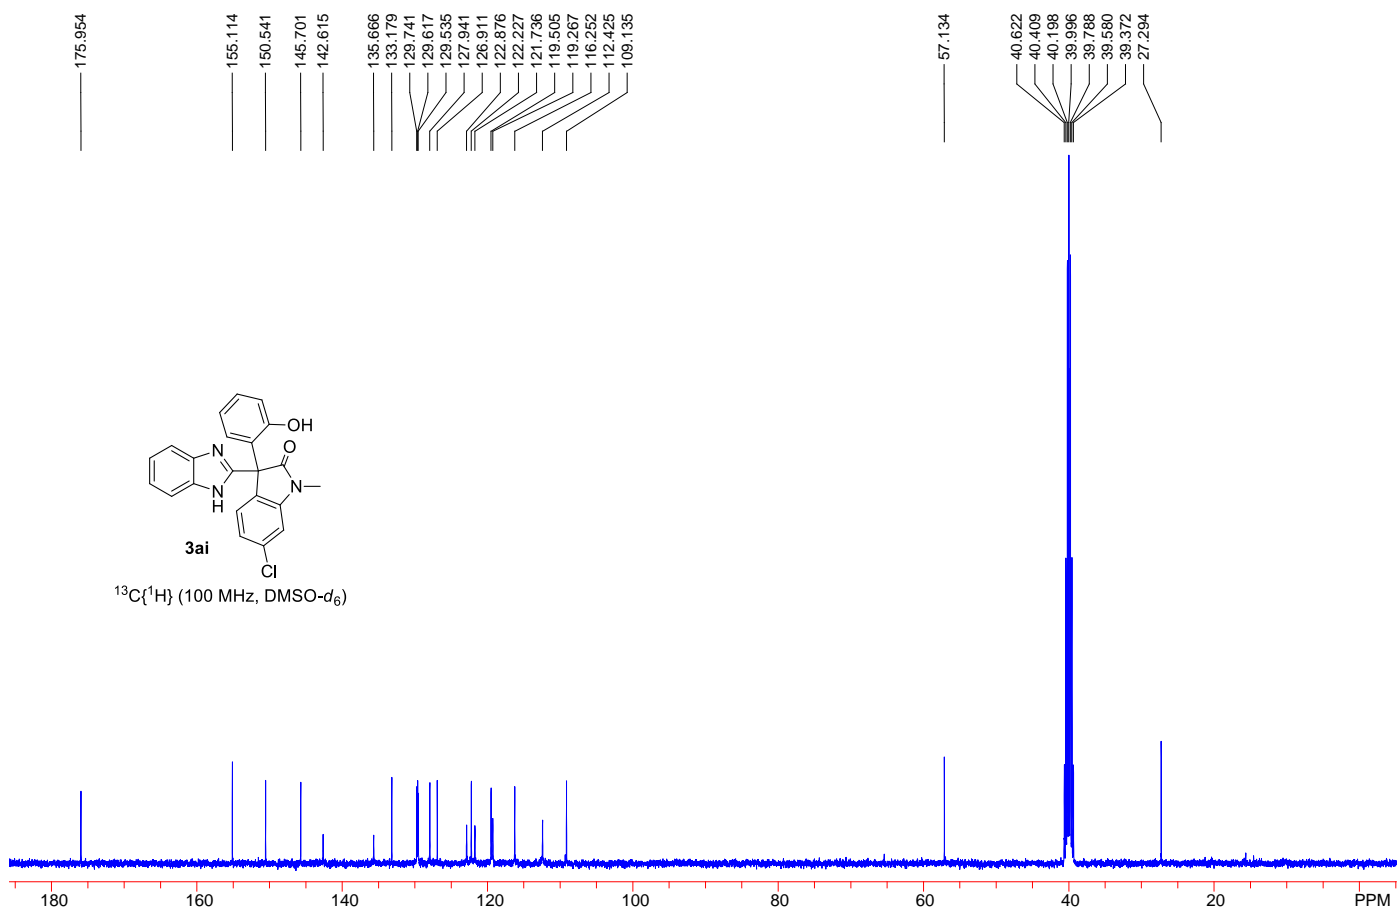

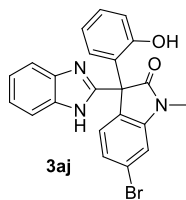

$^1\text{H NMR}$  (400 MHz,  $\text{DMSO-}d_6$ )

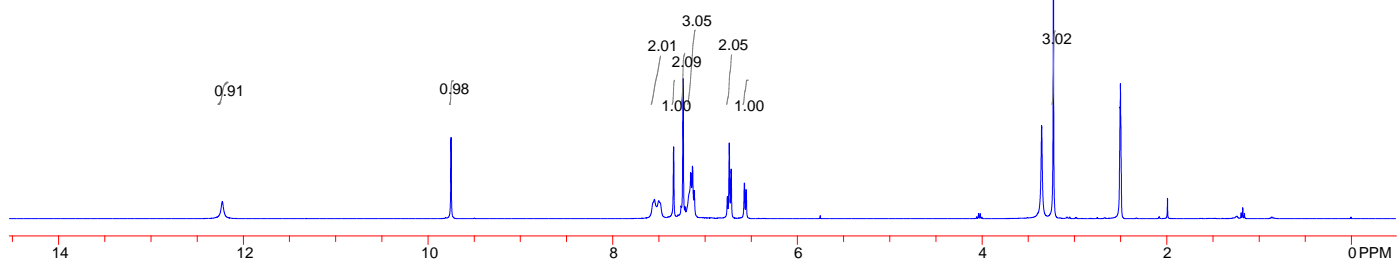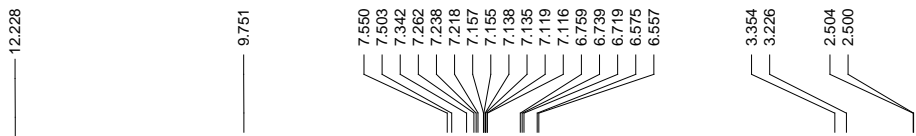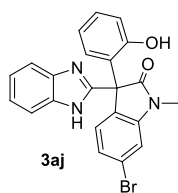

$^{13}\text{C}\{^1\text{H}\}$  (100 MHz,  $\text{DMSO-}d_6$ )

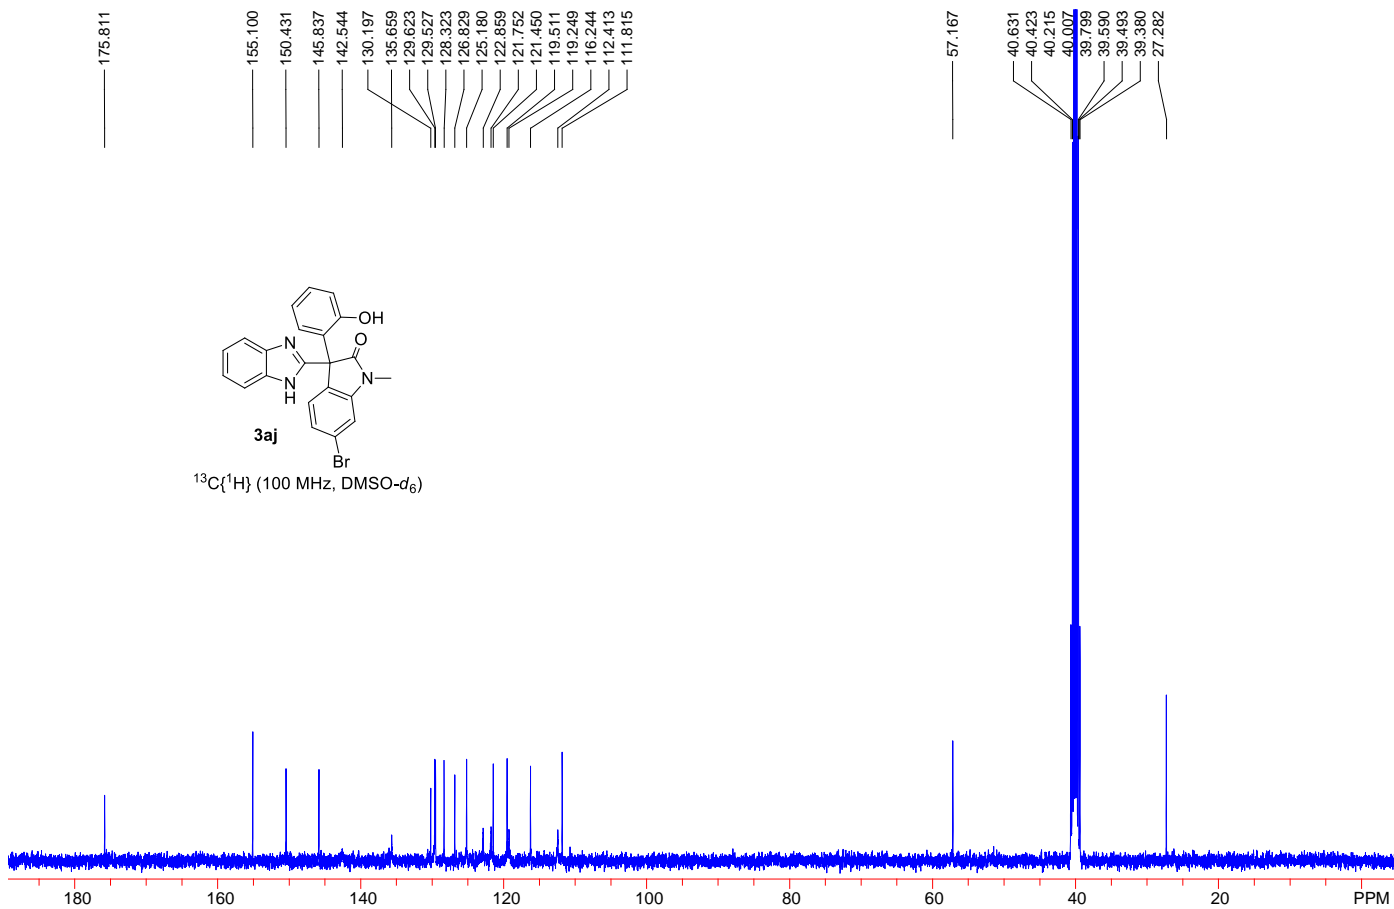

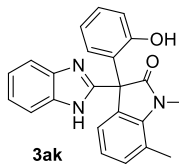

$^1\text{H NMR}$  (400 MHz,  $\text{DMSO-}d_6$ )

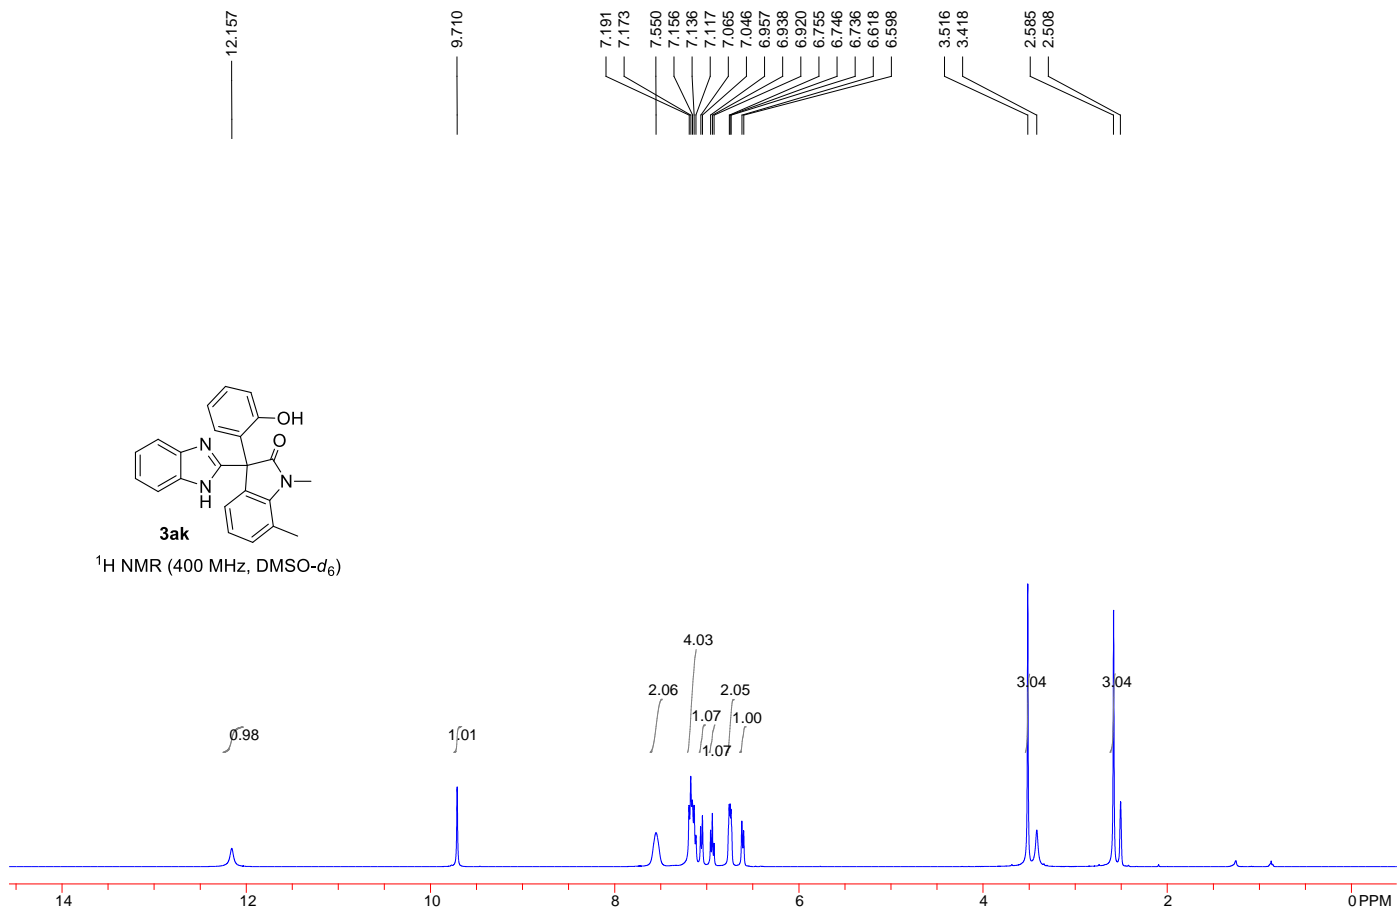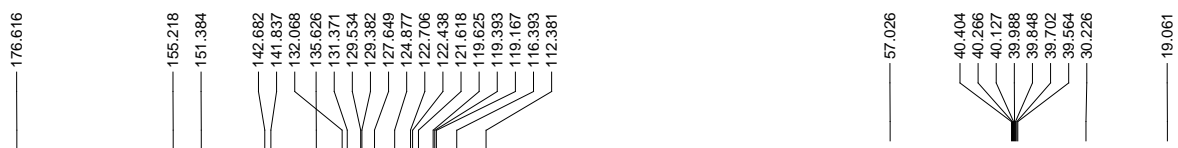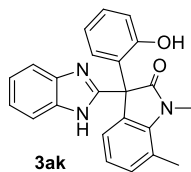

$^{13}\text{C}\{^1\text{H}\}$  (150 MHz,  $\text{DMSO-}d_6$ )

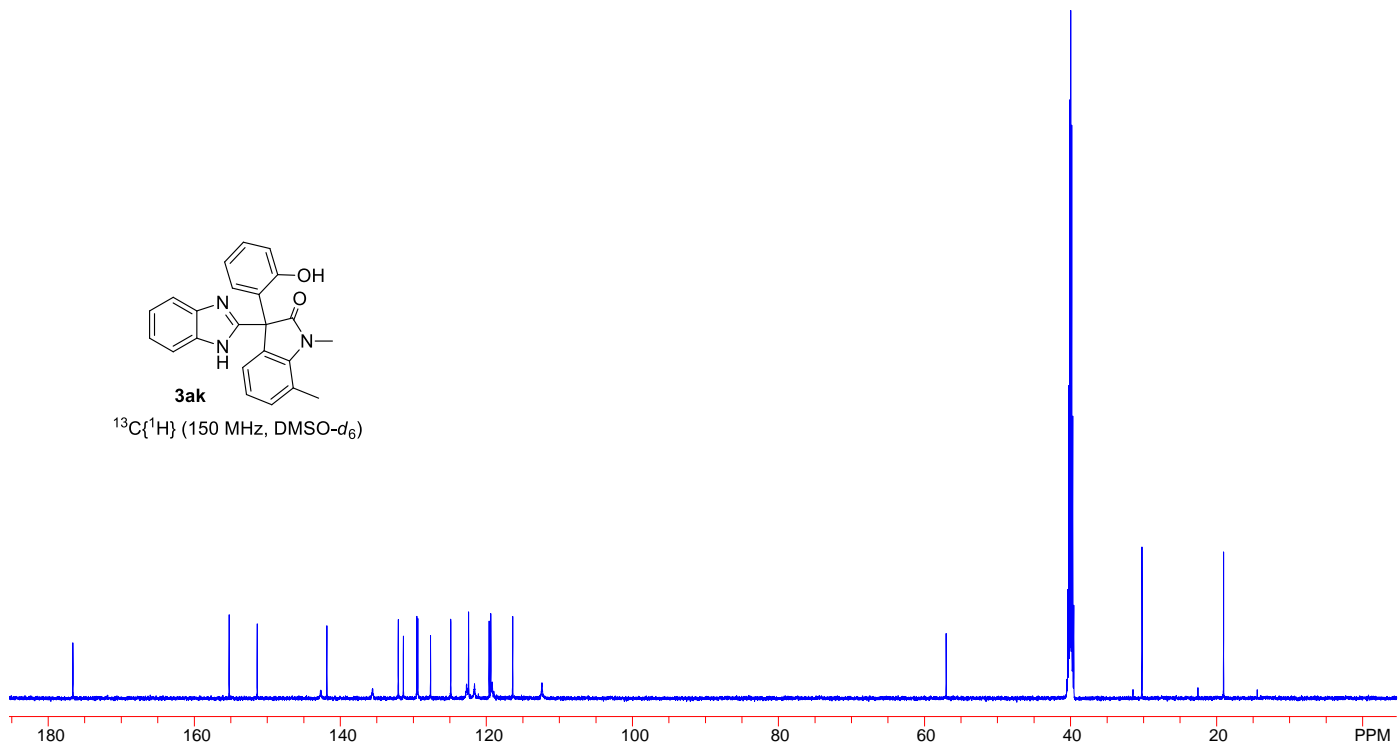

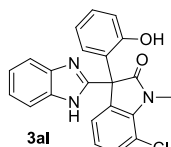

$^1\text{H NMR}$  (400 MHz,  $\text{DMSO-}d_6$ )

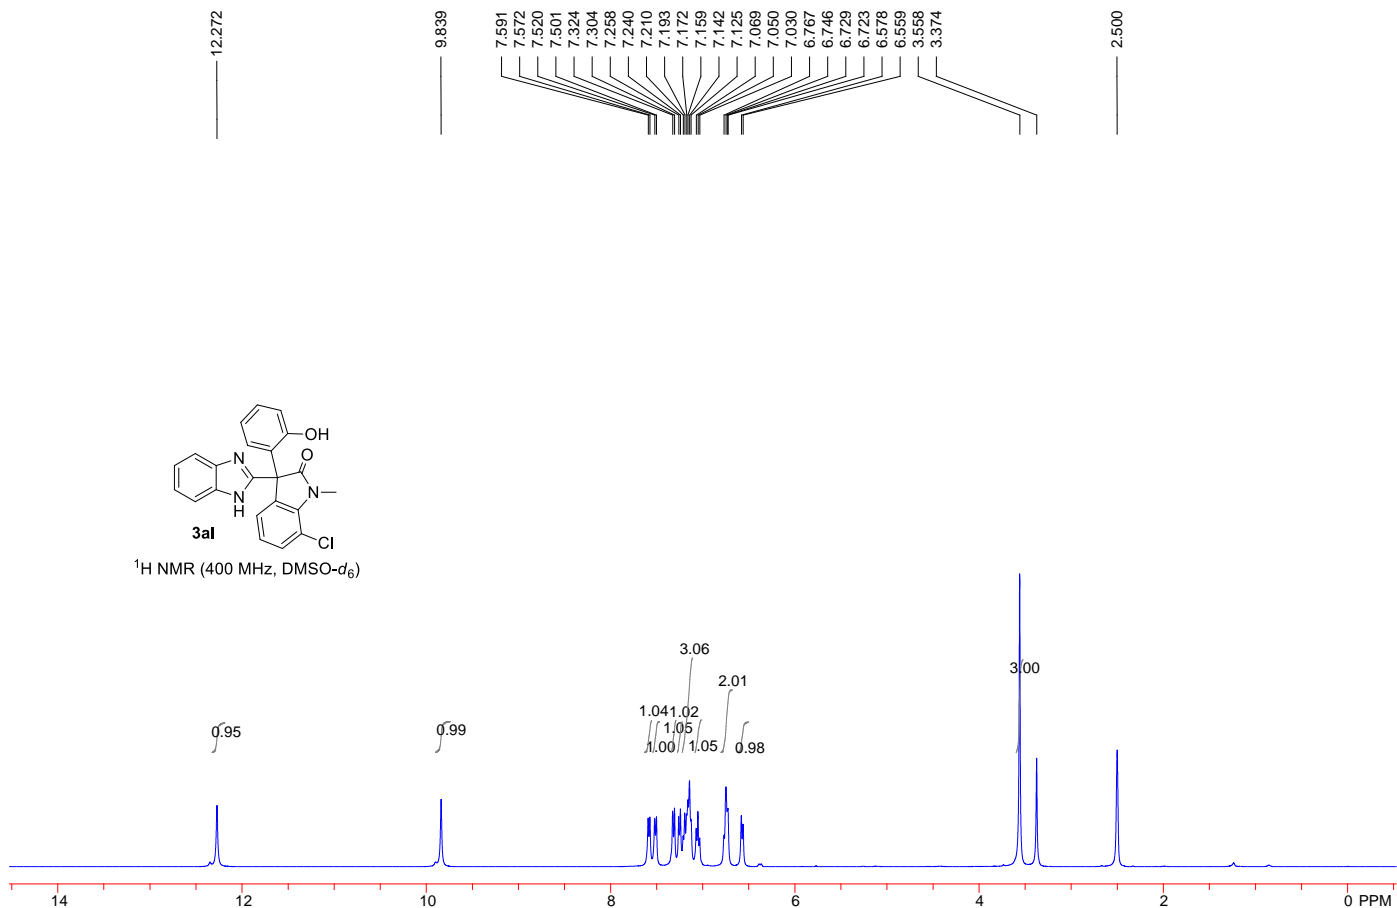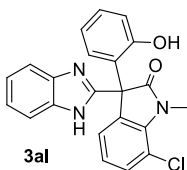

$^{13}\text{C}\{^1\text{H}\}$  (100 MHz,  $\text{DMSO-}d_6$ )

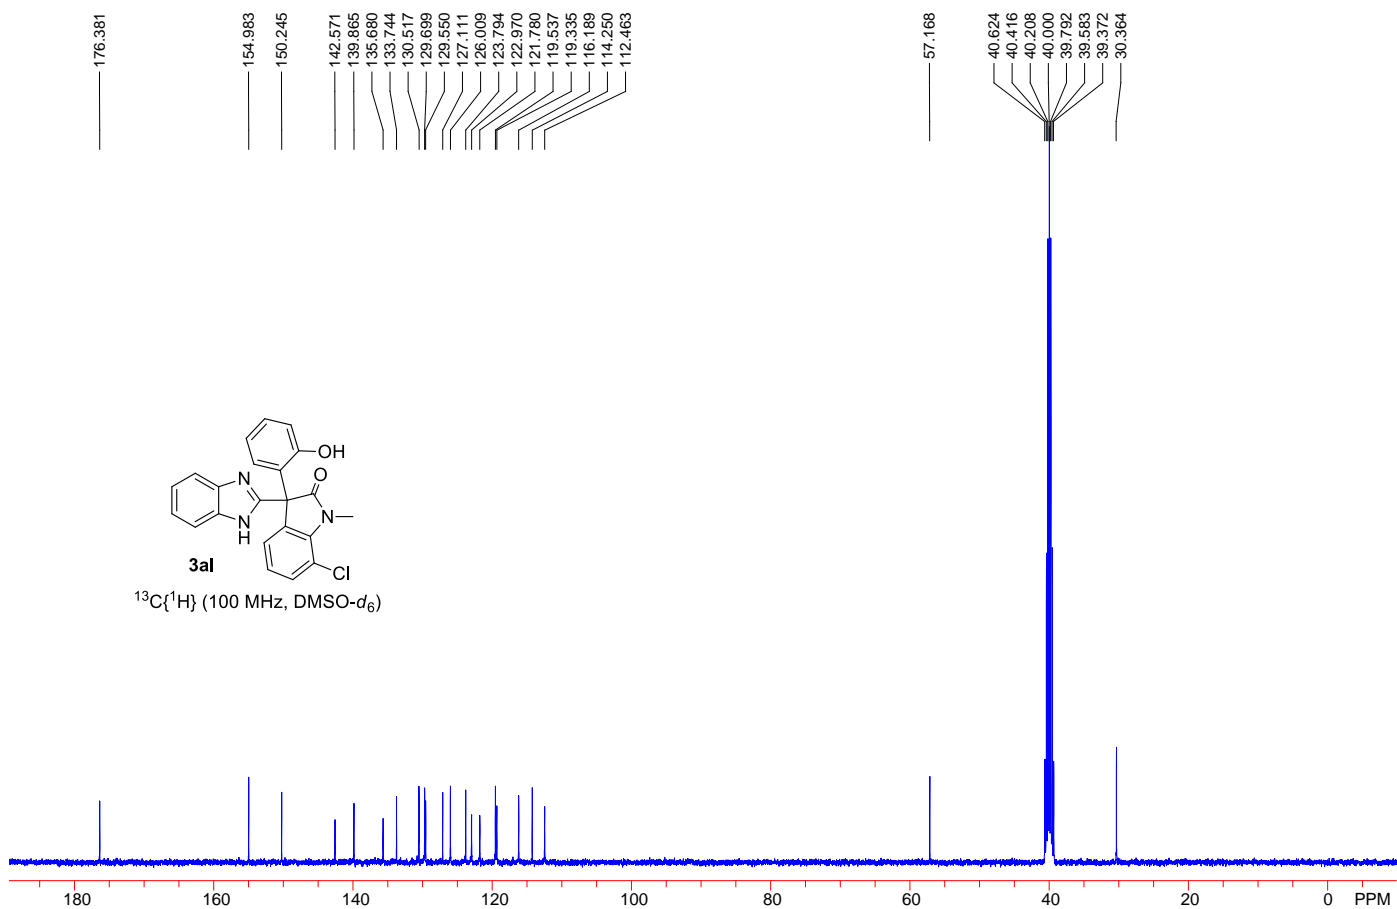



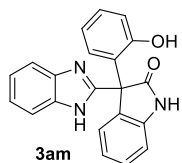

$^1\text{H NMR}$  (600 MHz,  $\text{DMSO-}d_6$ )

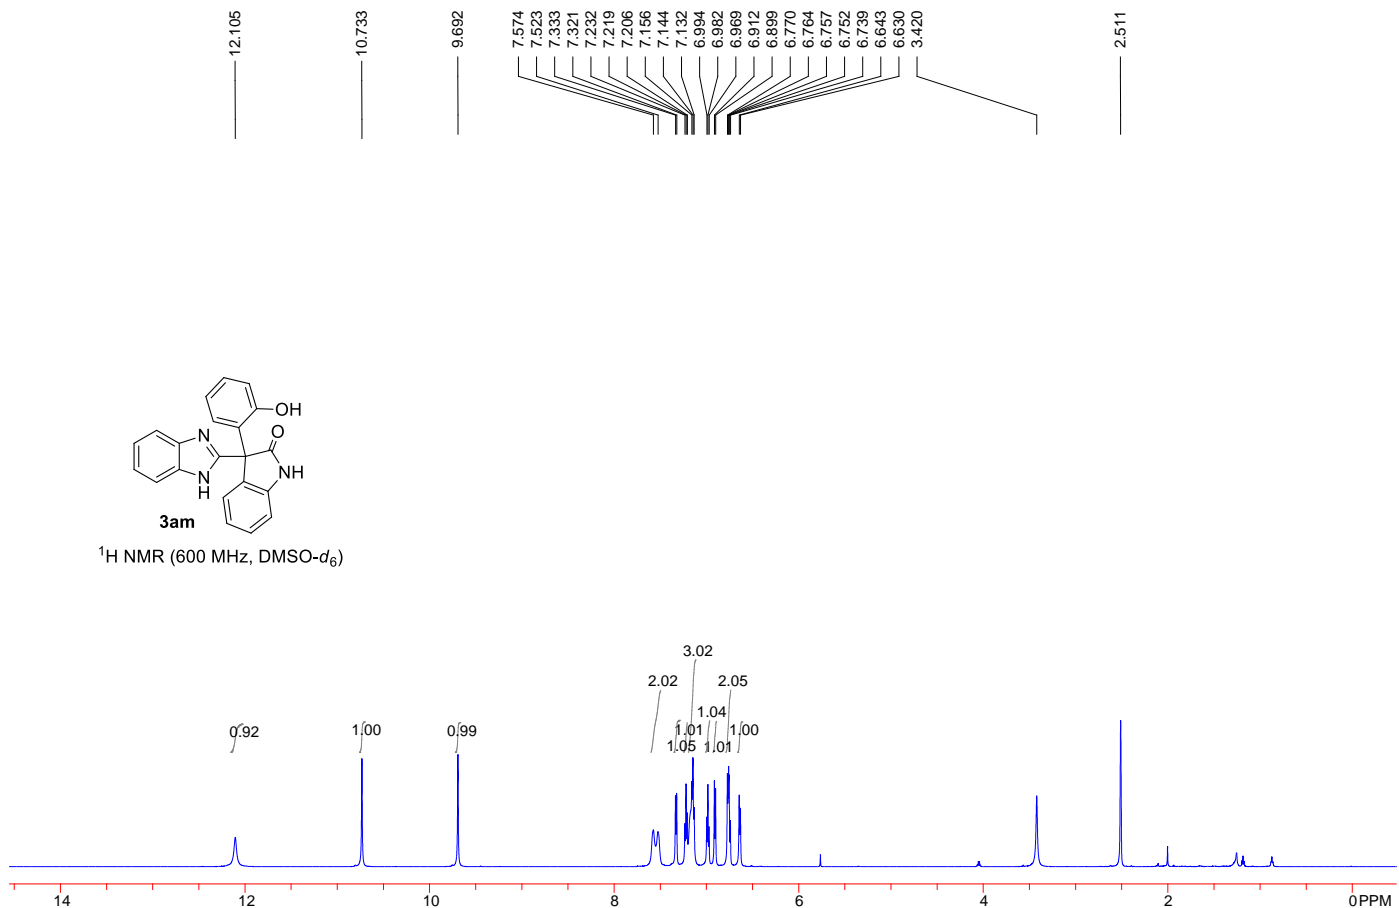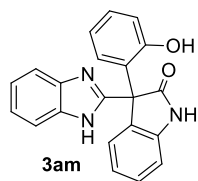

$^{13}\text{C}\{^1\text{H}\}$  (100 MHz,  $\text{DMSO-}d_6$ )

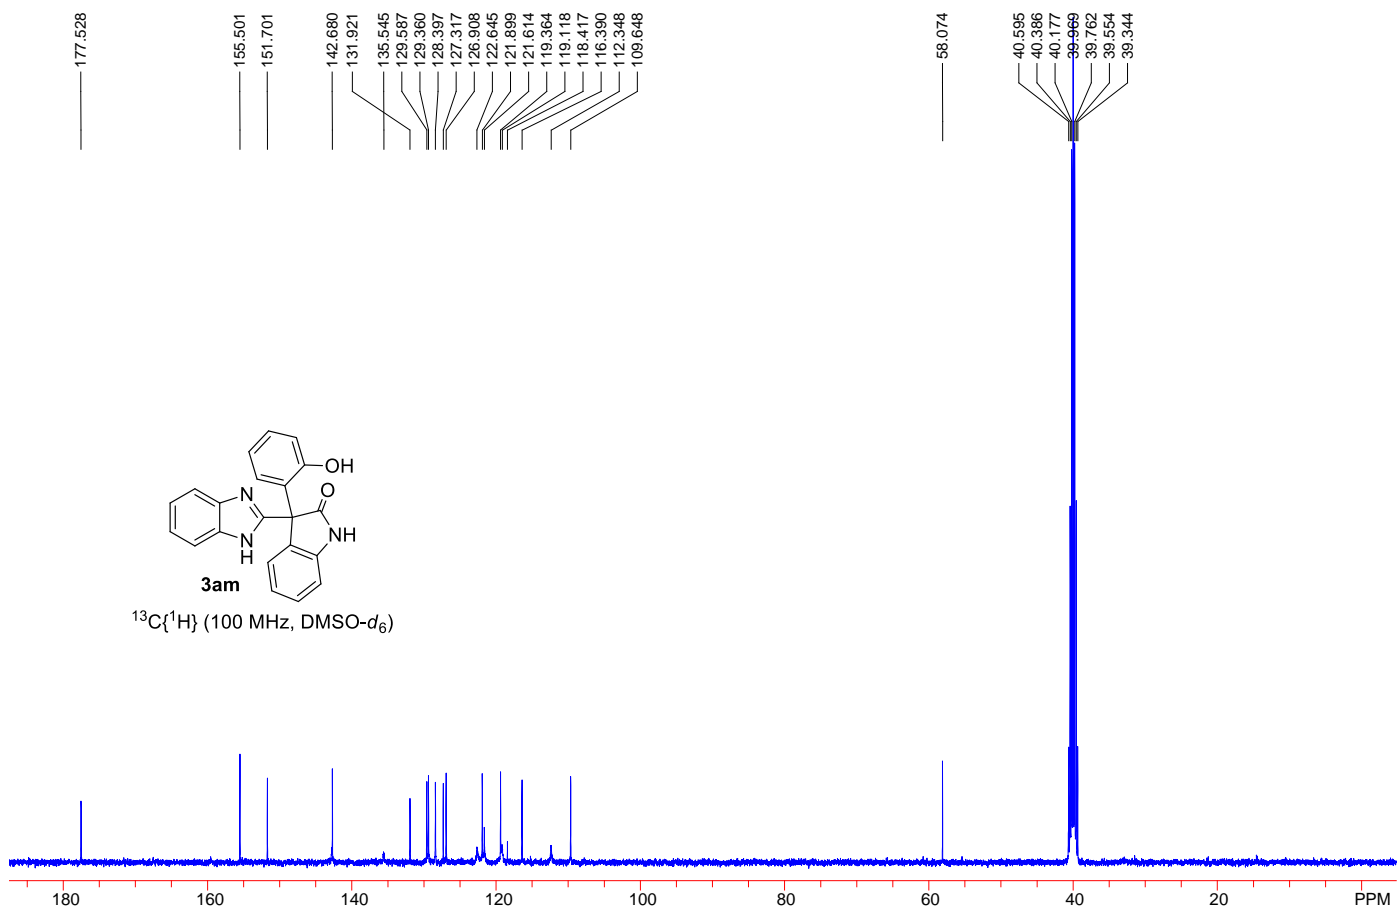

## V. NMR spectra of 5aa-5ac

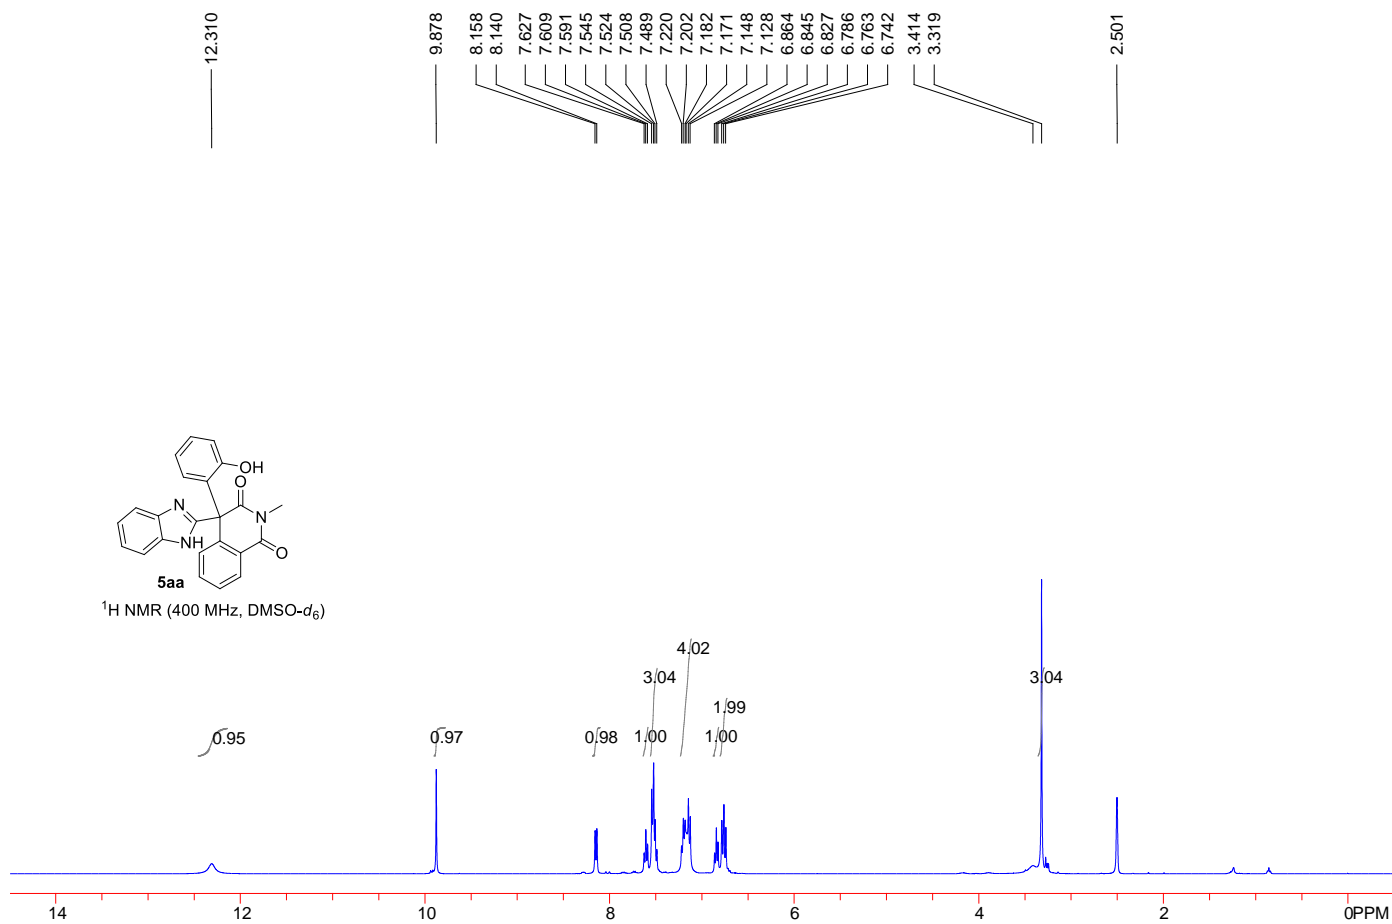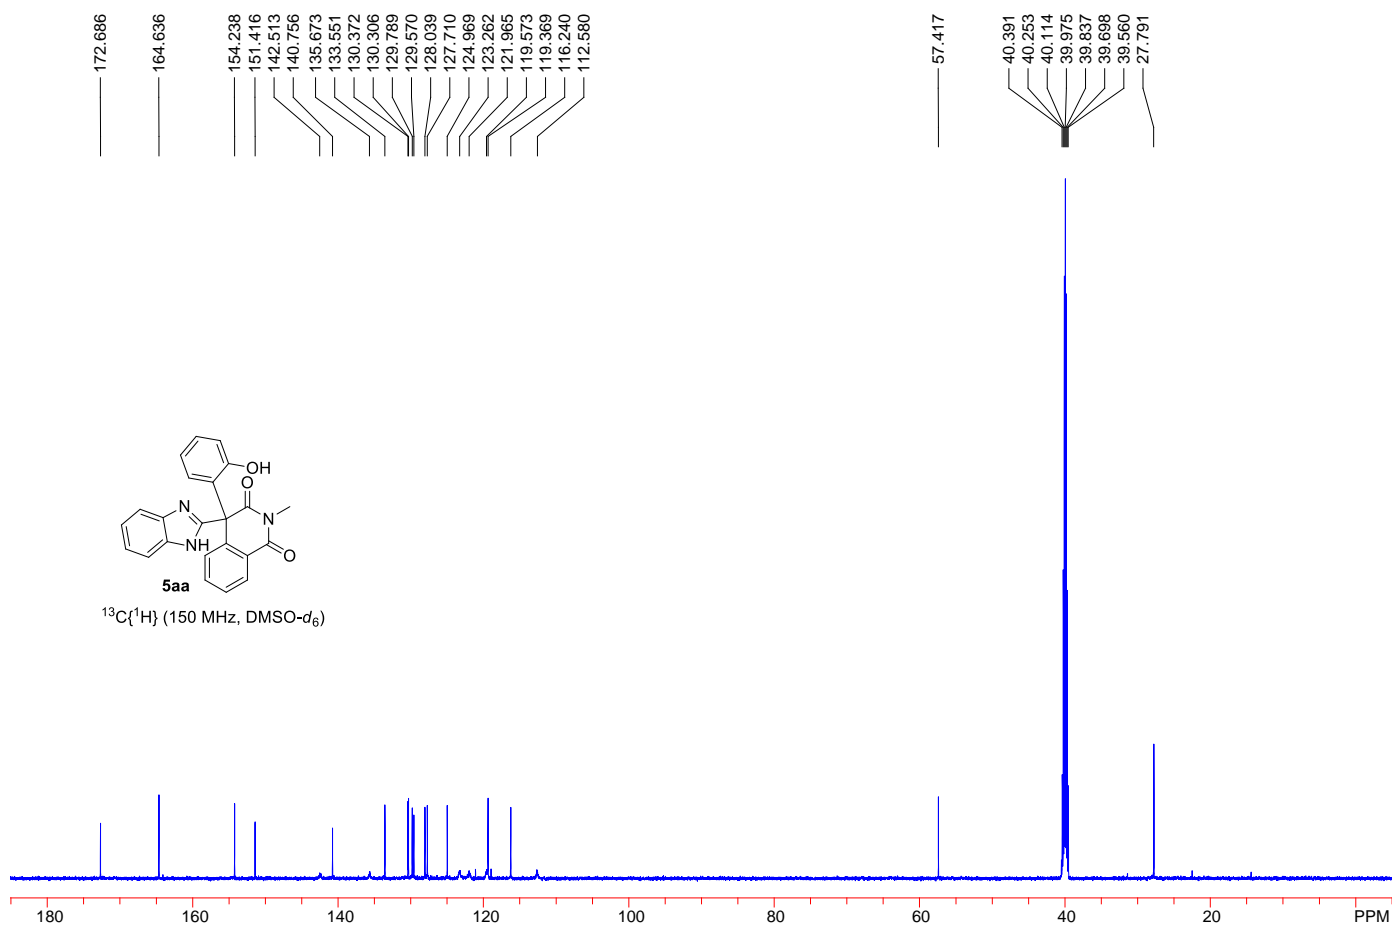

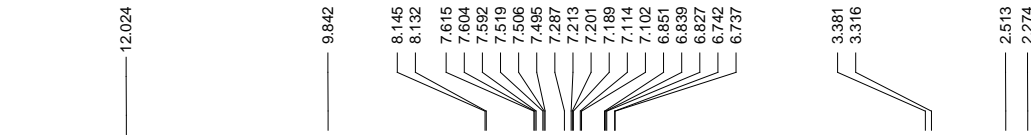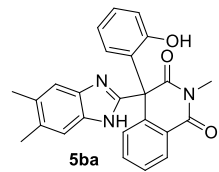

$^1\text{H NMR}$  (600 MHz,  $\text{DMSO-}d_6$ )

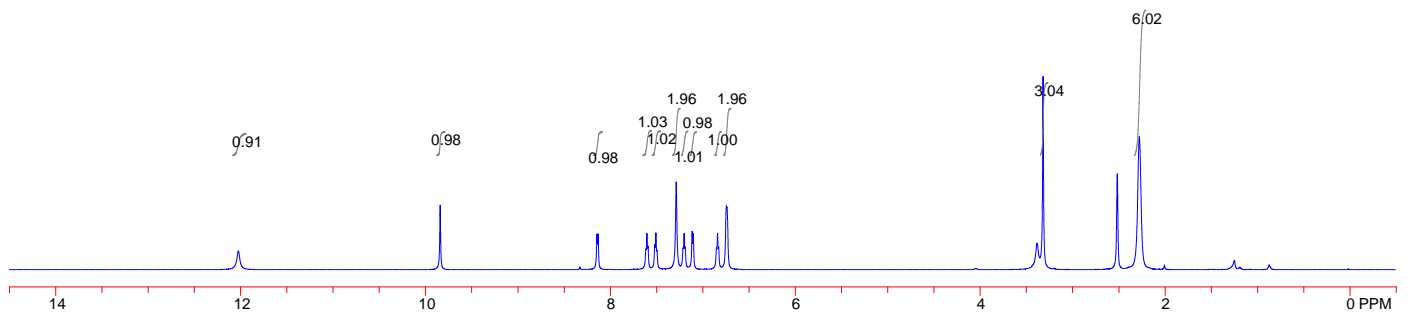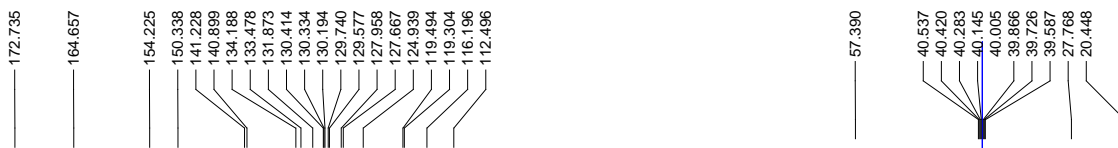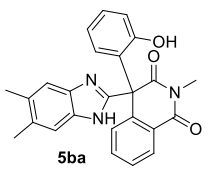

$^{13}\text{C}\{^1\text{H}\}$  (150 MHz,  $\text{DMSO-}d_6$ )

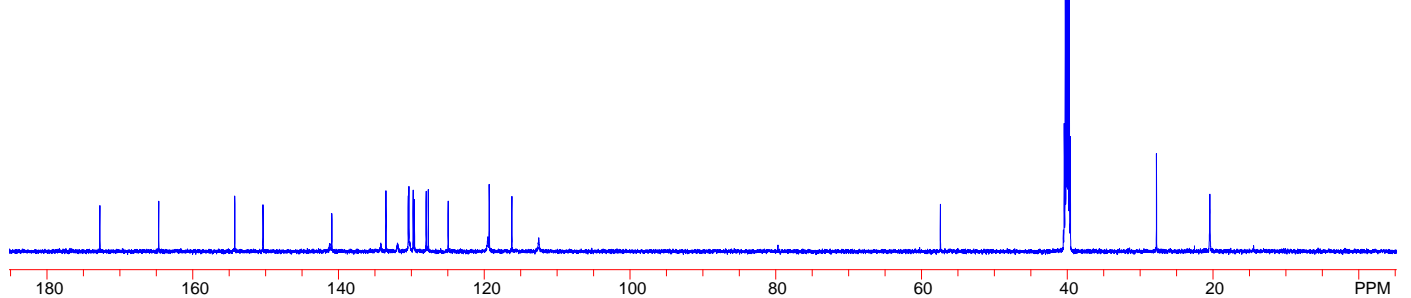

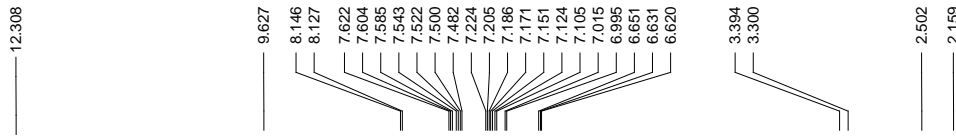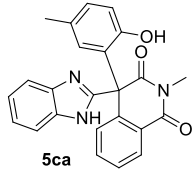

$^1\text{H}$  NMR (400 MHz,  $\text{DMSO}-d_6$ )

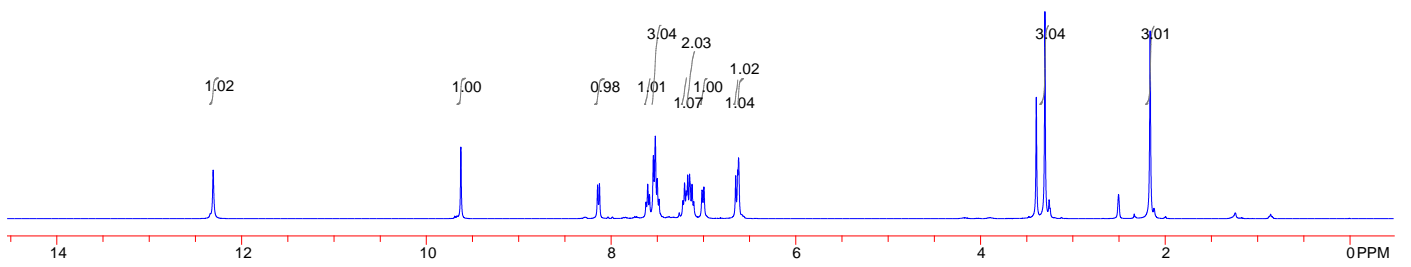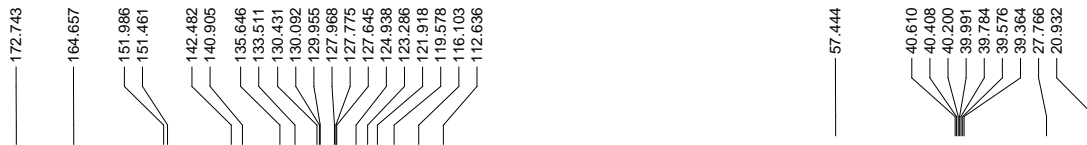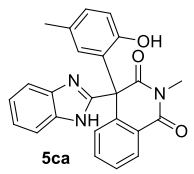

$^{13}\text{C}\{^1\text{H}\}$  (100 MHz,  $\text{DMSO}-d_6$ )

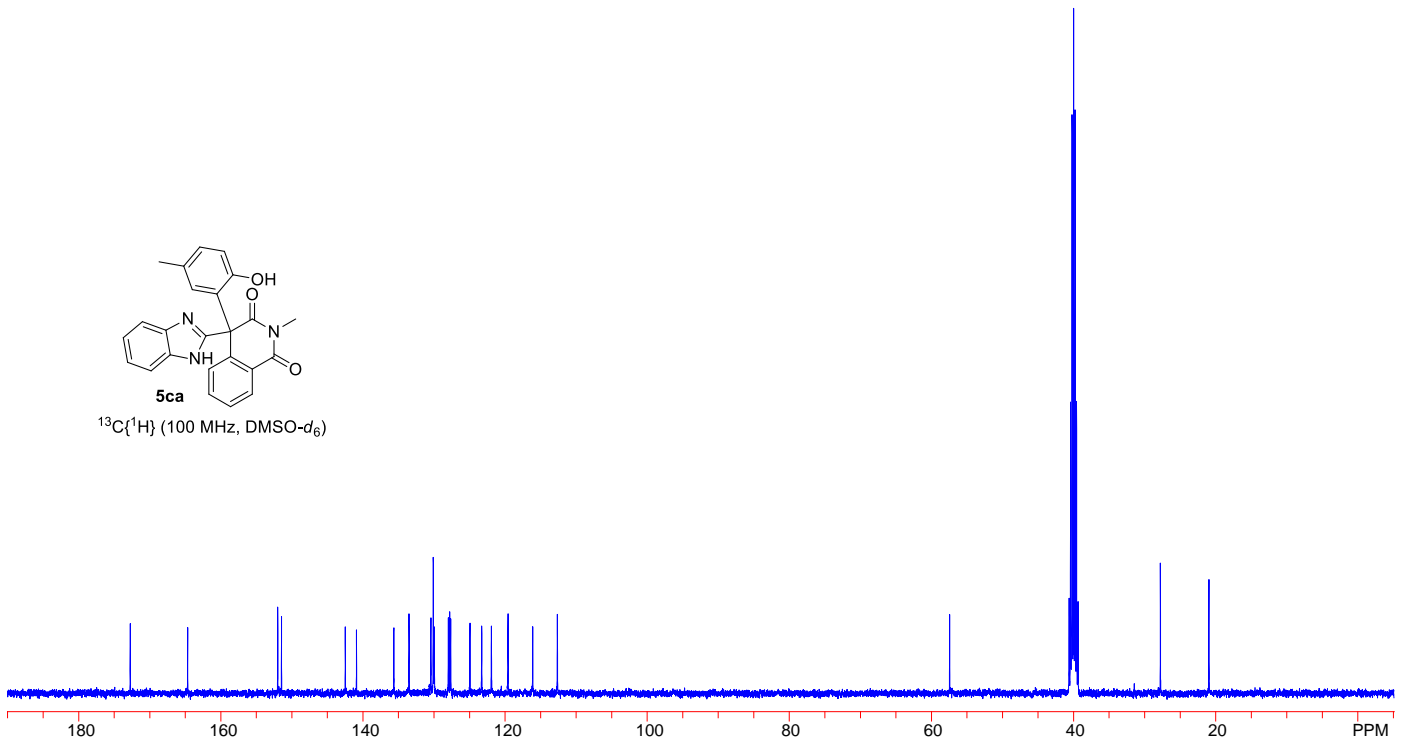

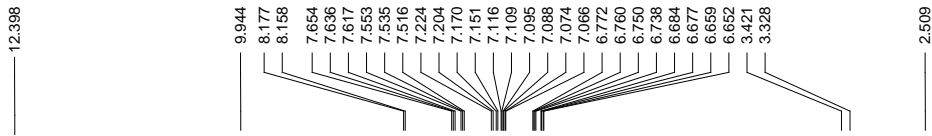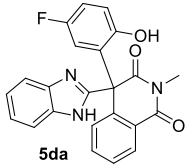

$^1\text{H NMR}$  (400 MHz,  $\text{DMSO-}d_6$ )

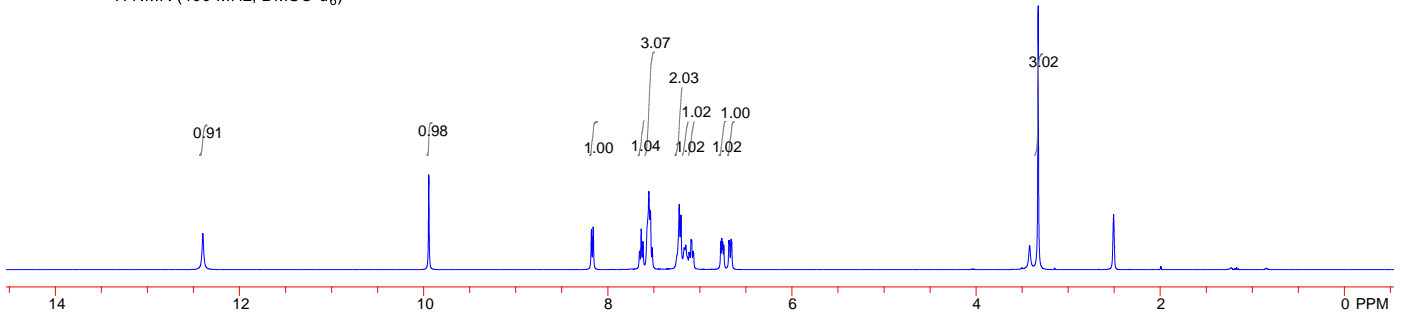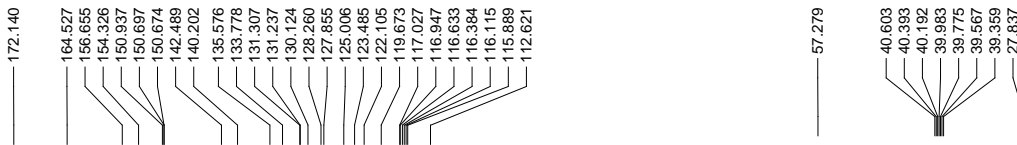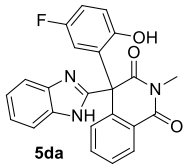

$^{13}\text{C}\{^1\text{H}\}$  (100 MHz,  $\text{DMSO-}d_6$ )

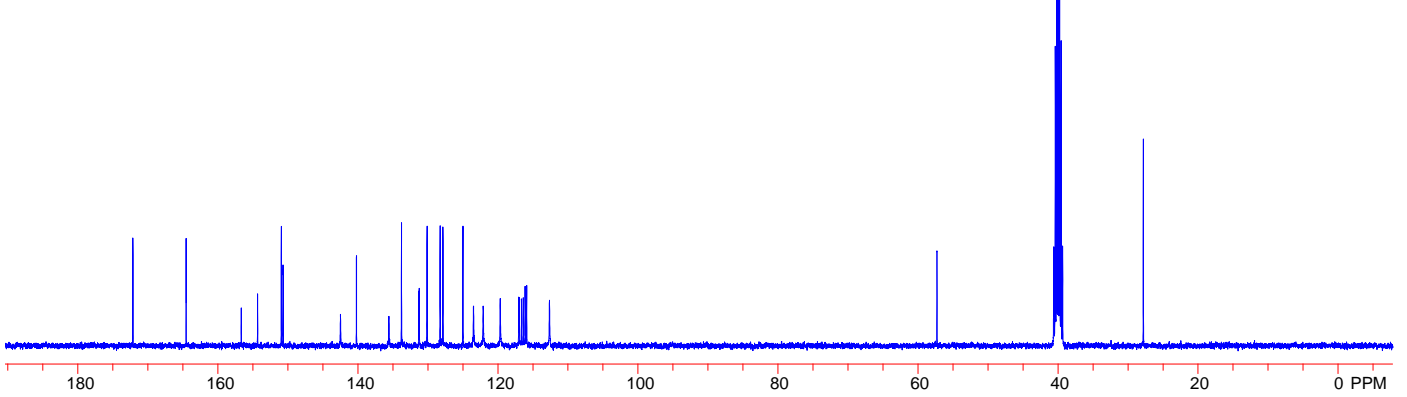

125.037  
125.051  
125.065  
125.073  
125.086  
125.097

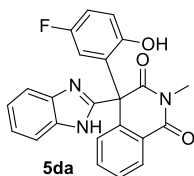

$^{19}\text{F}$  NMR (376 MHz,  $\text{DMSO-}d_6$ )

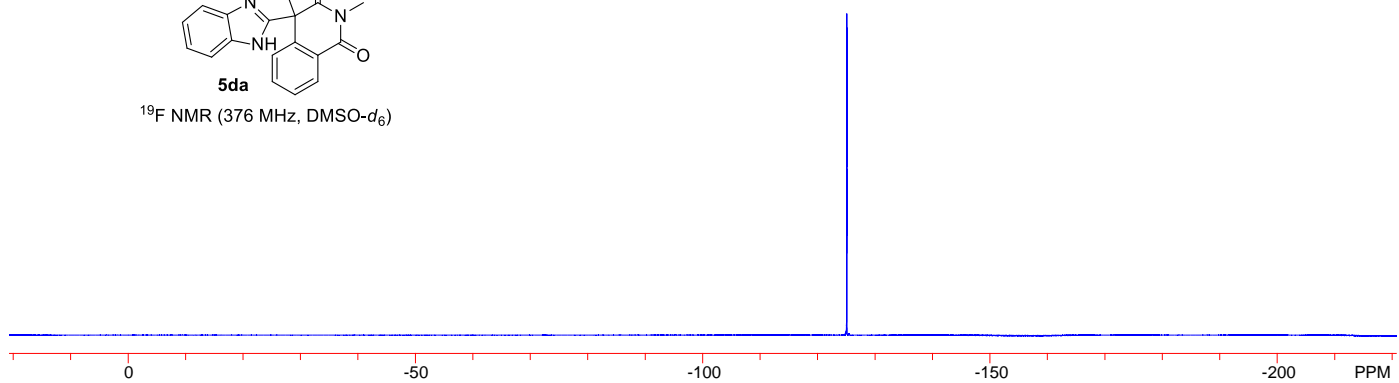

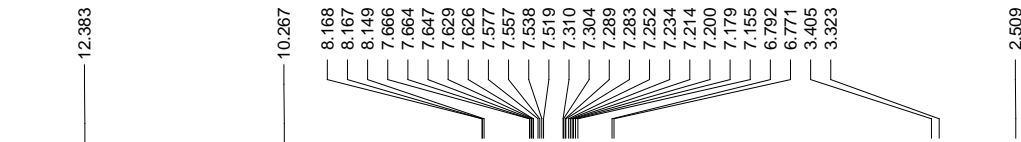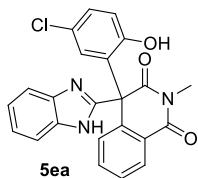

$^1\text{H}$  NMR (400 MHz,  $\text{DMSO-}d_6$ )

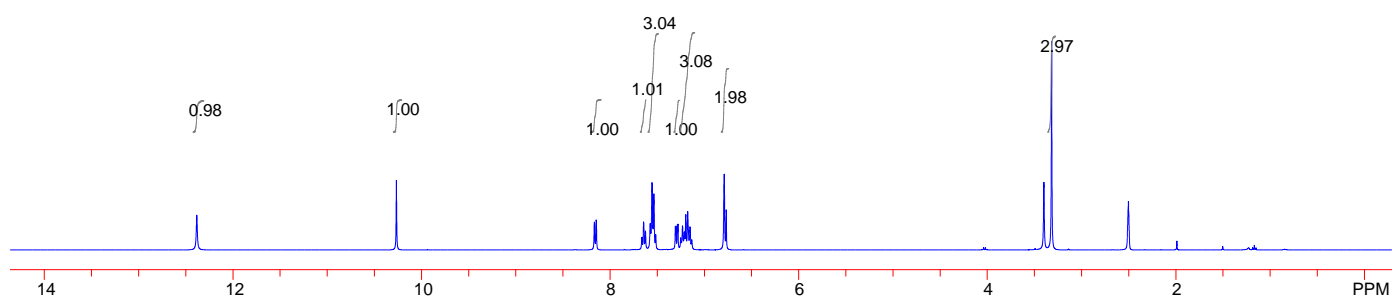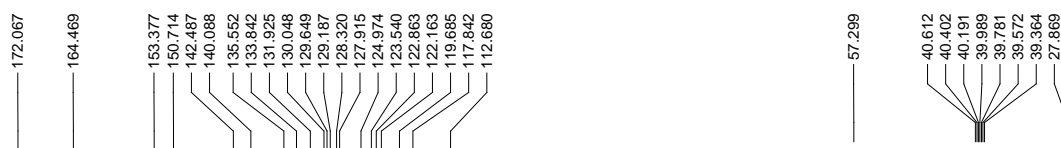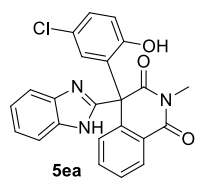

$^{13}\text{C}\{^1\text{H}\}$  (100 MHz,  $\text{DMSO-}d_6$ )

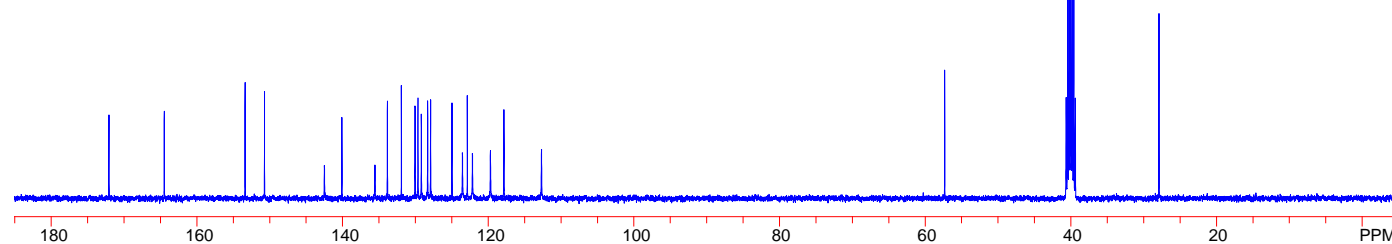

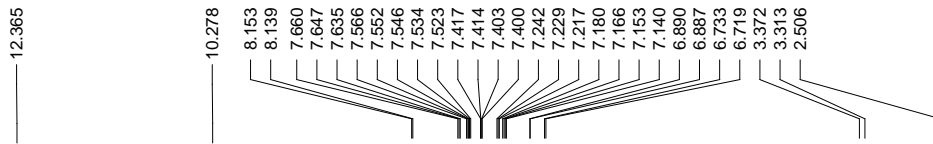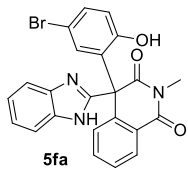

$^1\text{H NMR}$  (600 MHz,  $\text{DMSO-}d_6$ )

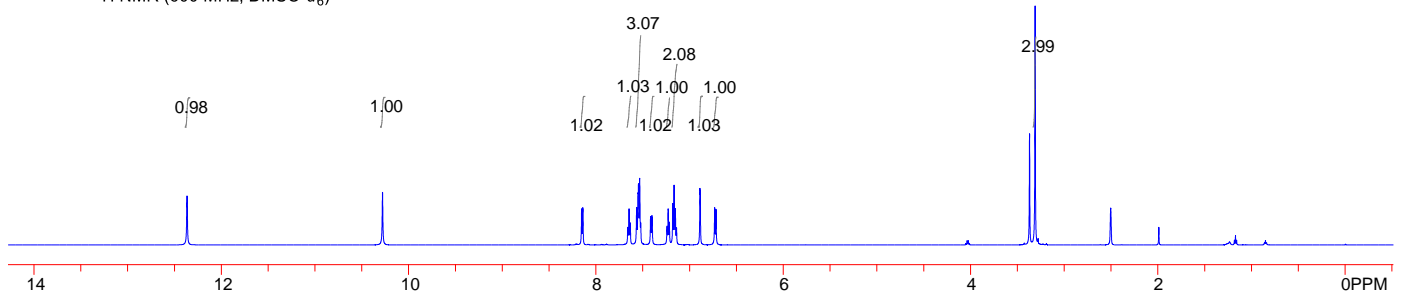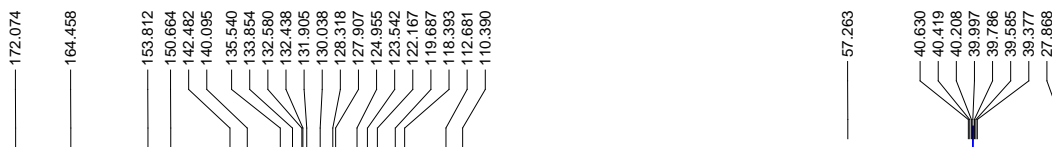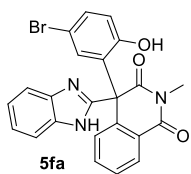

$^{13}\text{C}\{^1\text{H}\}$  (100 MHz,  $\text{DMSO-}d_6$ )

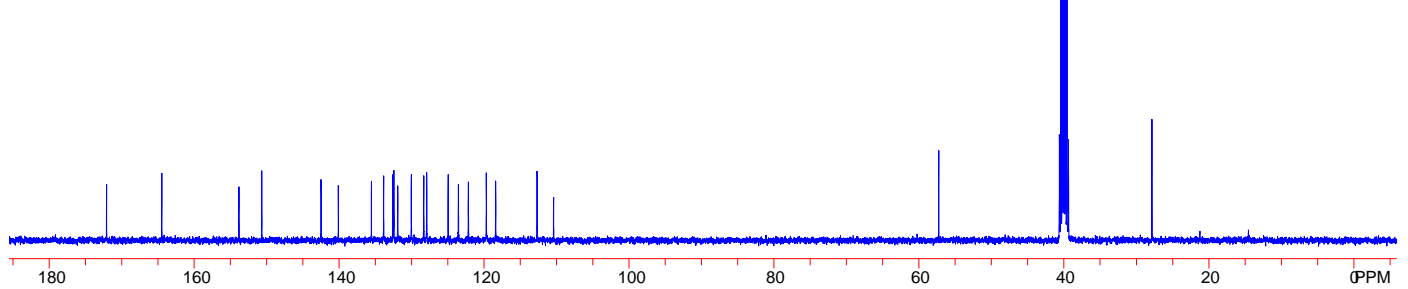



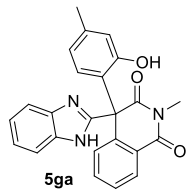

$^1\text{H NMR}$  (600 MHz,  $\text{DMSO-}d_6$ )

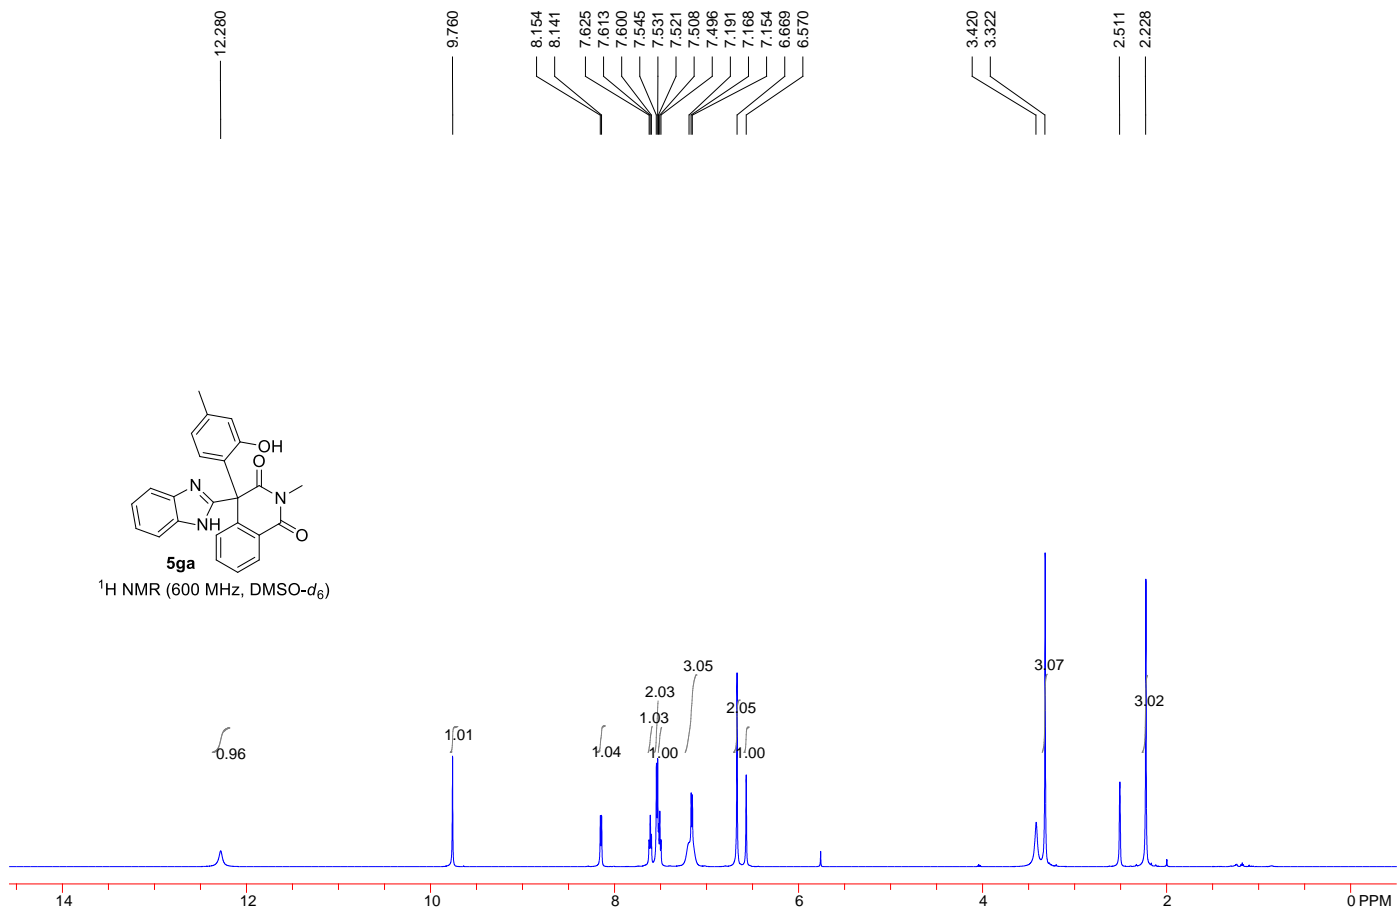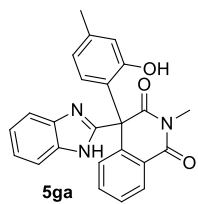

$^{13}\text{C}\{^1\text{H}\}$  (100 MHz,  $\text{DMSO-}d_6$ )

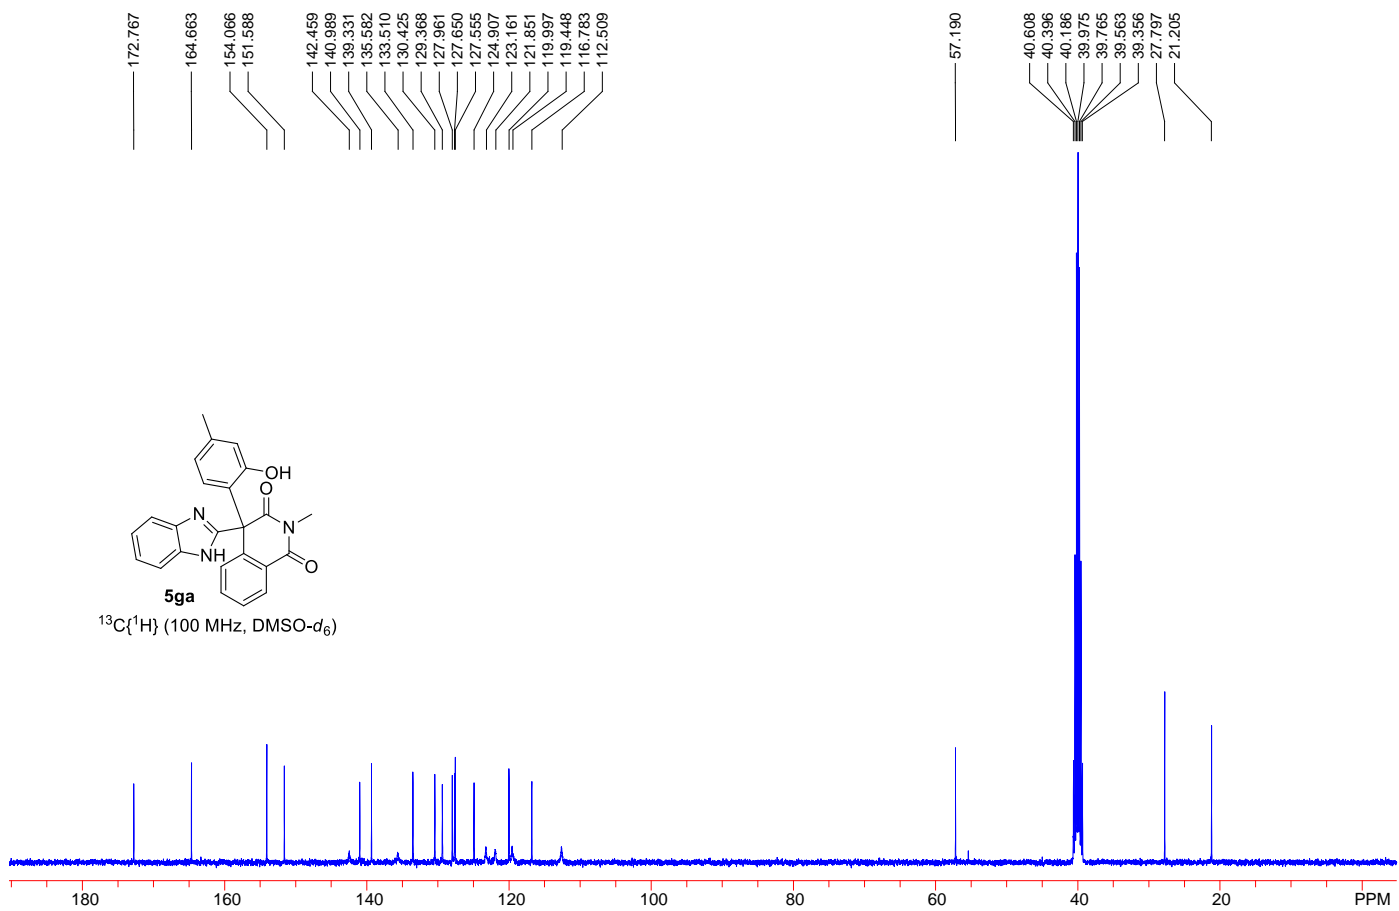

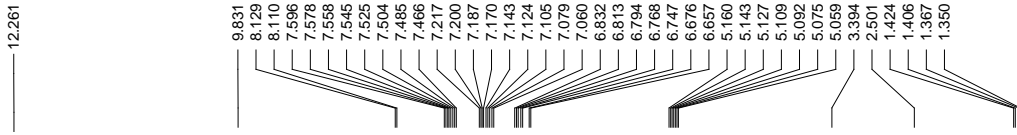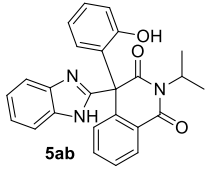

$^1\text{H}$  NMR (400 MHz,  $\text{DMSO-}d_6$ )

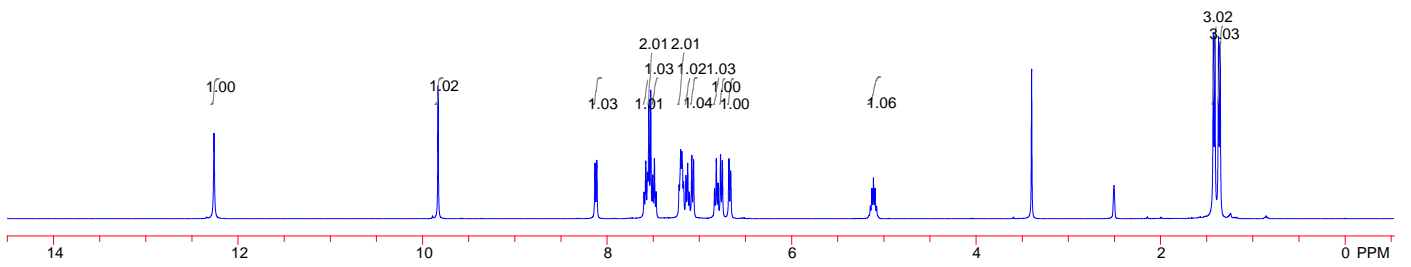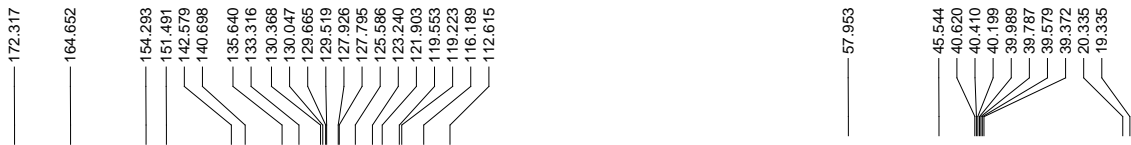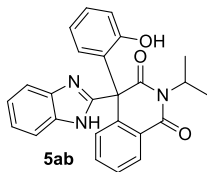

$^{13}\text{C}\{^1\text{H}\}$  (100 MHz,  $\text{DMSO-}d_6$ )

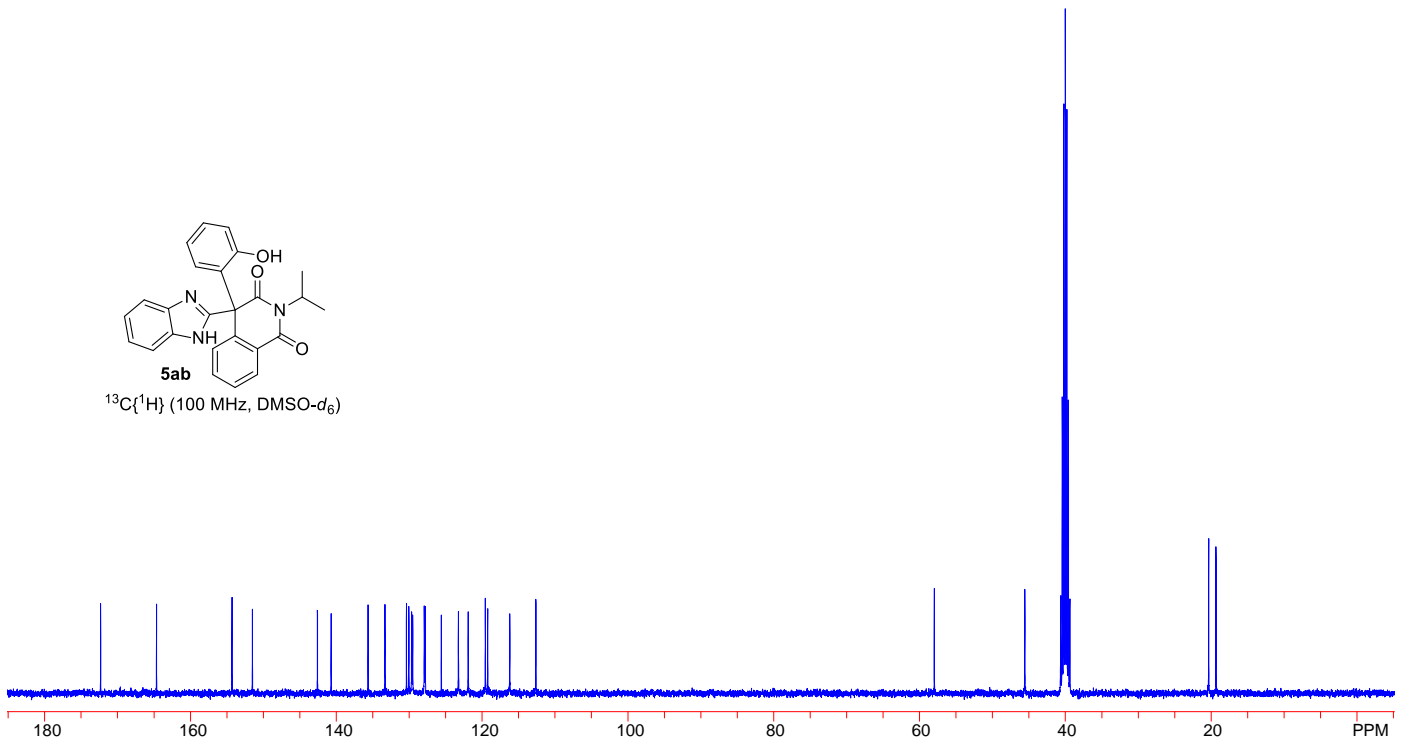

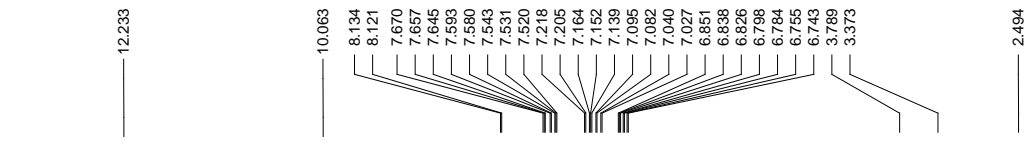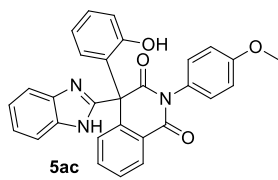

$^1\text{H NMR}$  (600 MHz,  $\text{DMSO-}d_6$ )

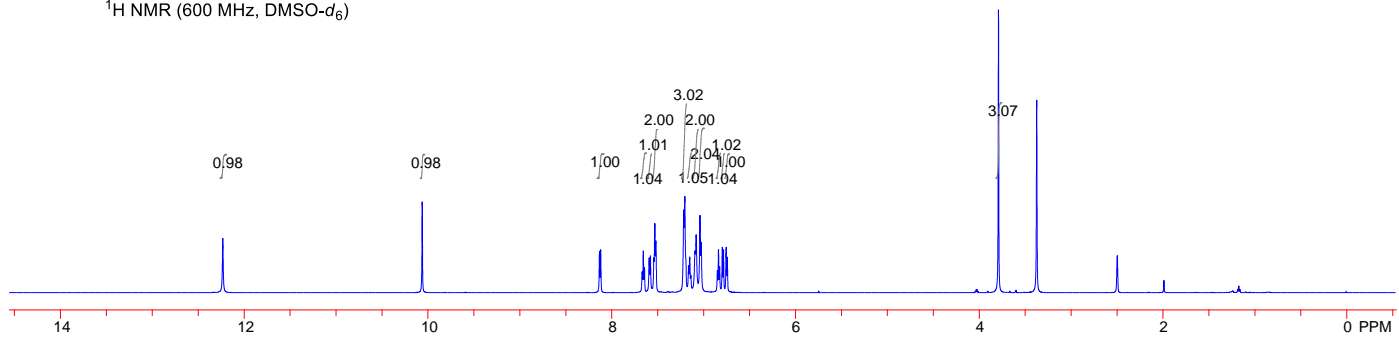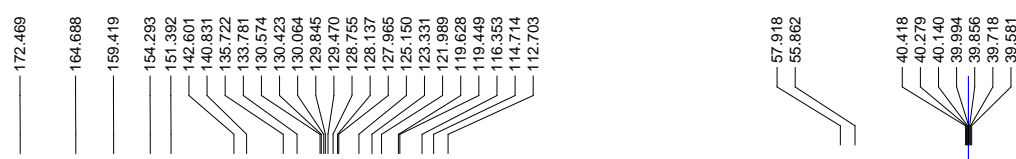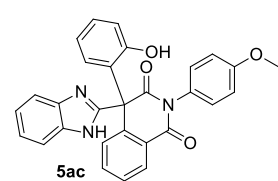

$^{13}\text{C}\{^1\text{H}\}$  (150 MHz,  $\text{DMSO-}d_6$ )

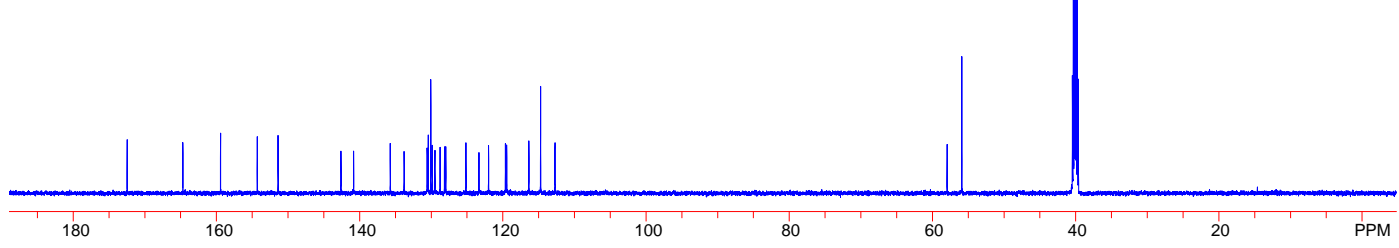

## VI. NMR spectra of 6 and 7

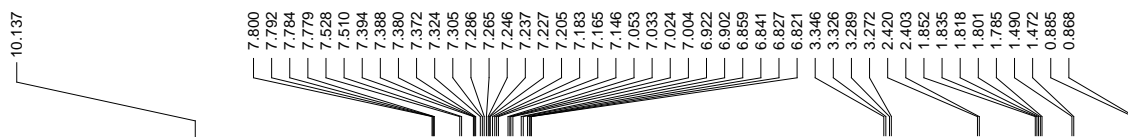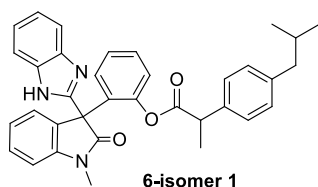

$^1\text{H}$  NMR (400 MHz,  $\text{CDCl}_3$ )

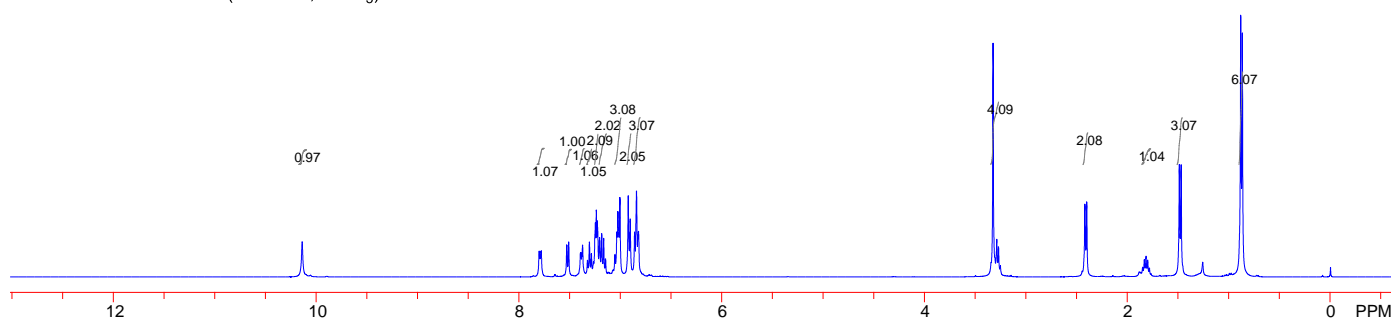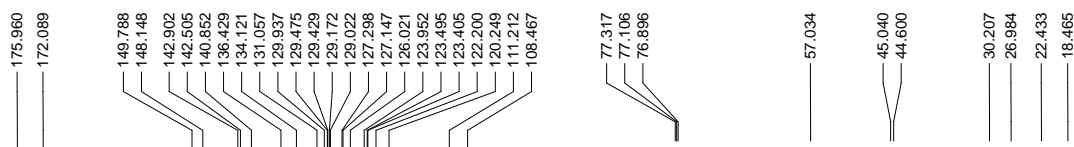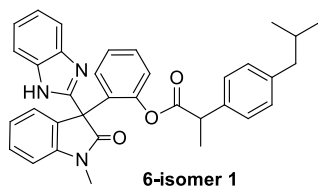

$^{13}\text{C}\{^1\text{H}\}$  (150 MHz,  $\text{CDCl}_3$ )

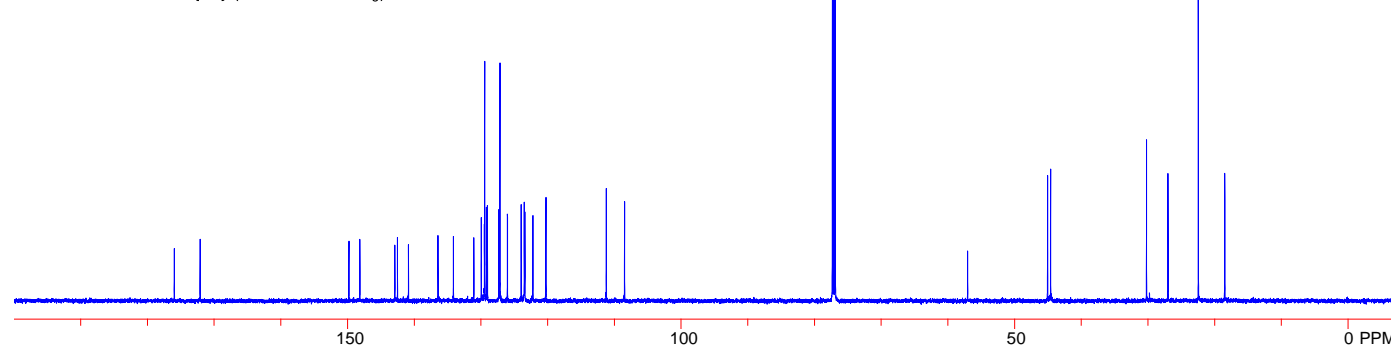

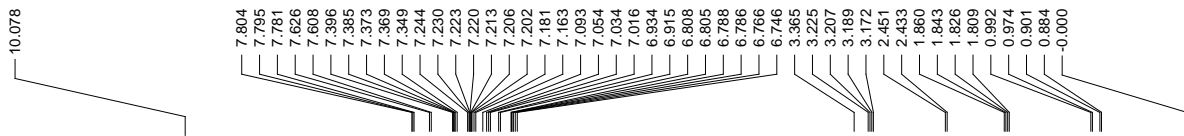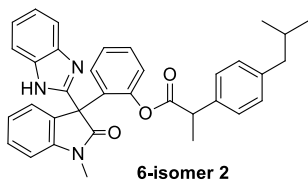

$^1\text{H NMR}$  (400 MHz,  $\text{CDCl}_3$ )

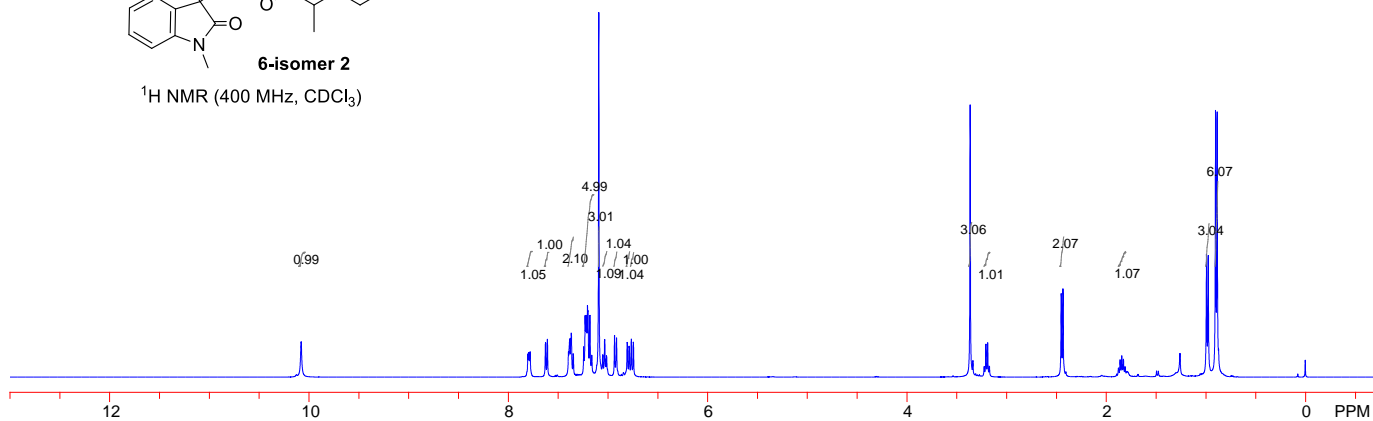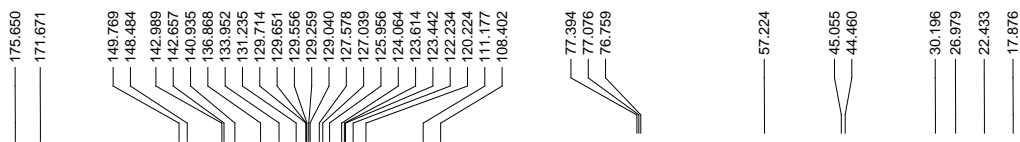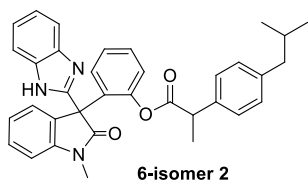

$^{13}\text{C}\{^1\text{H}\}$  (100 MHz,  $\text{CDCl}_3$ )

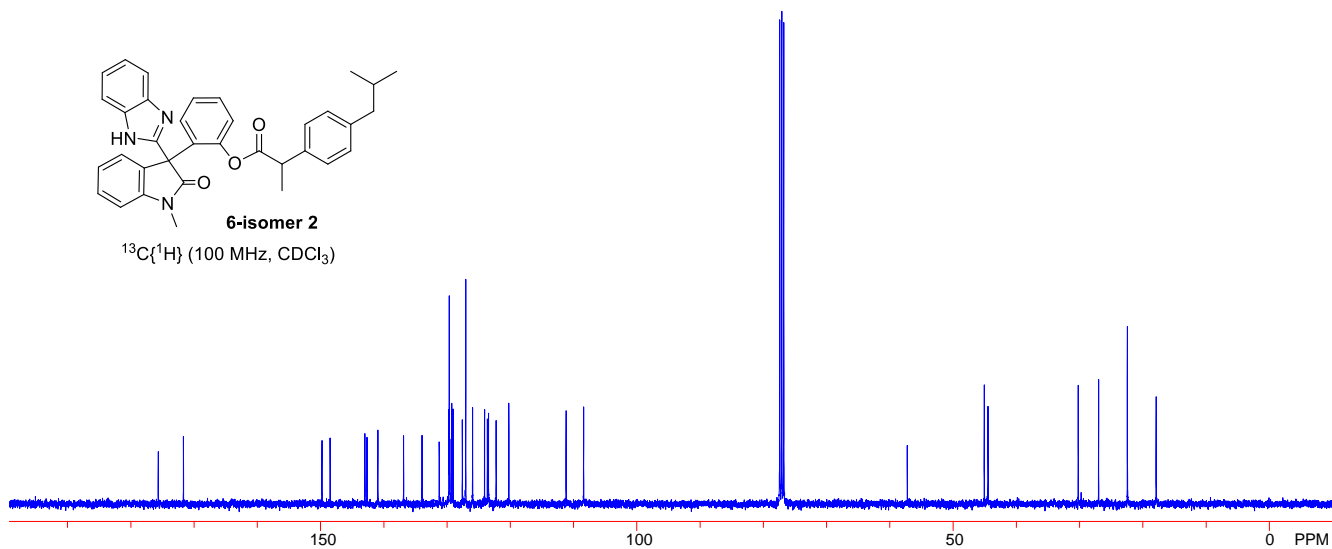

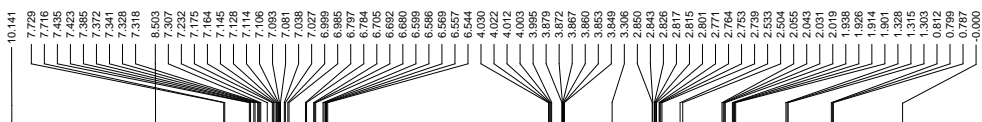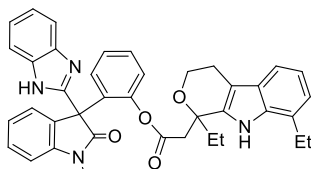

**7-isomer 1**

$^1\text{H NMR}$  (600 MHz,  $\text{CDCl}_3$ )

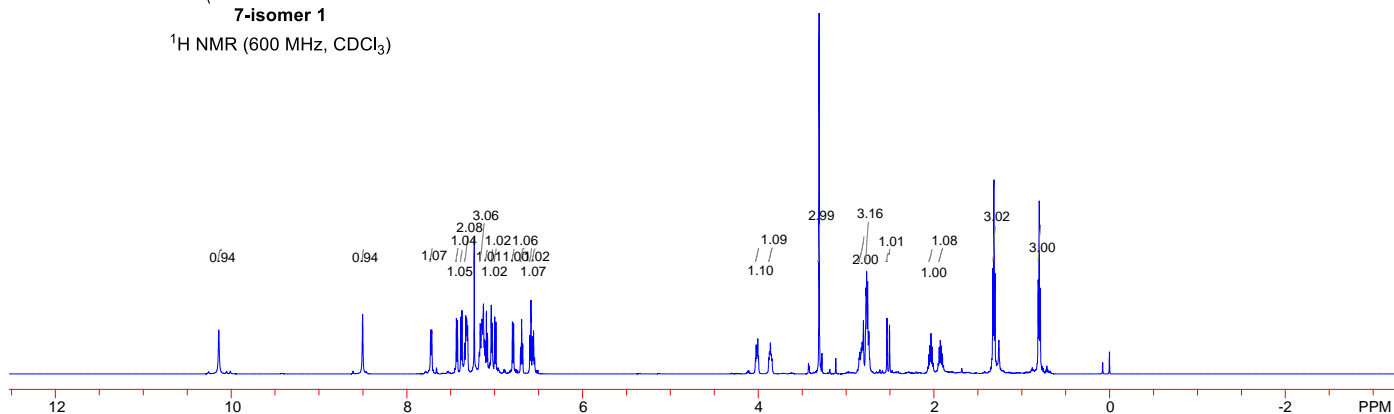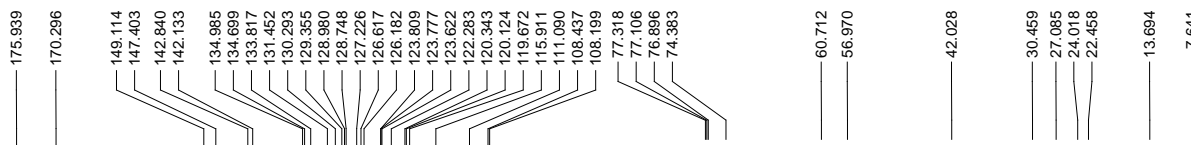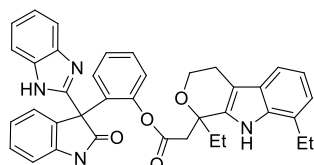

**7-isomer 1**

$^{13}\text{C}\{^1\text{H}\}$  (150 MHz,  $\text{CDCl}_3$ )

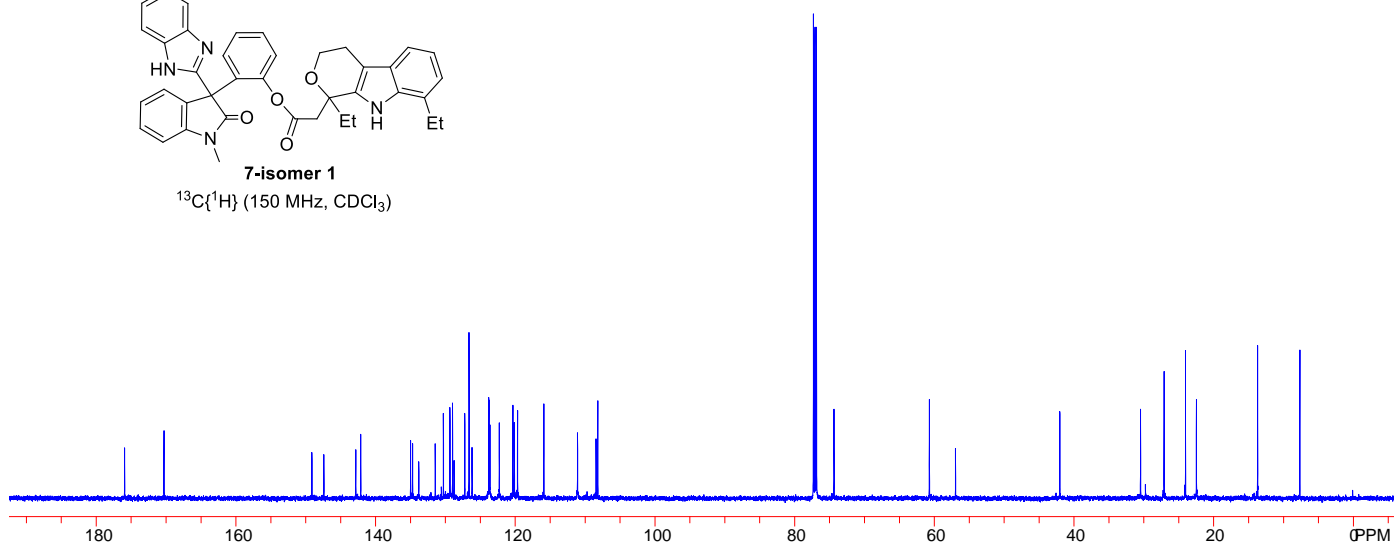

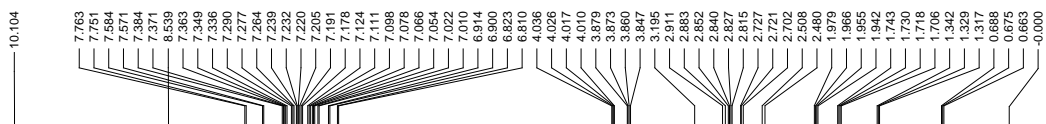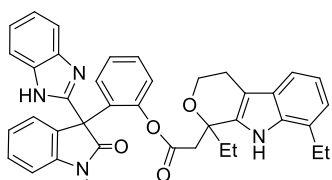

<sup>1</sup>H NMR (600 MHz, CDCl<sub>3</sub>)

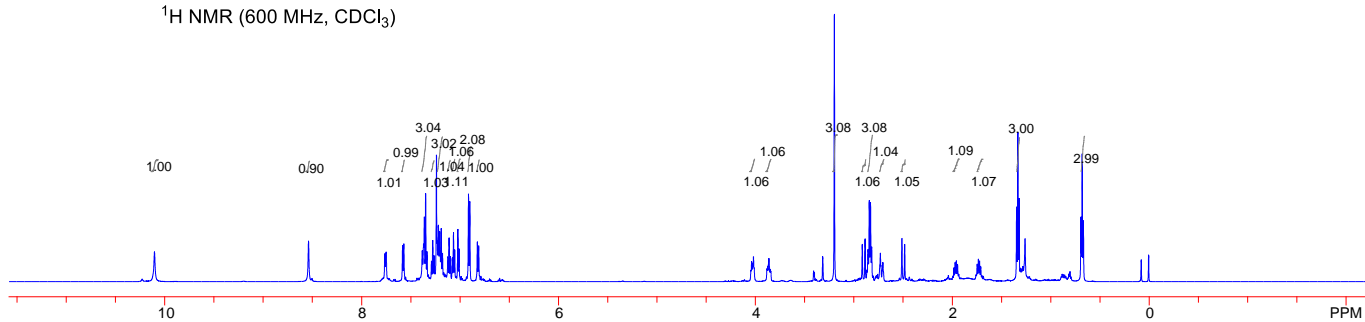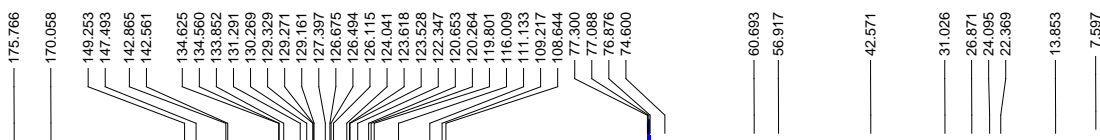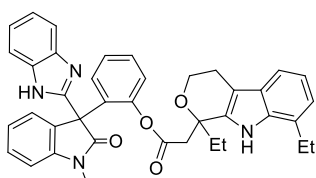

<sup>13</sup>C{<sup>1</sup>H} (150 MHz, CDCl<sub>3</sub>)

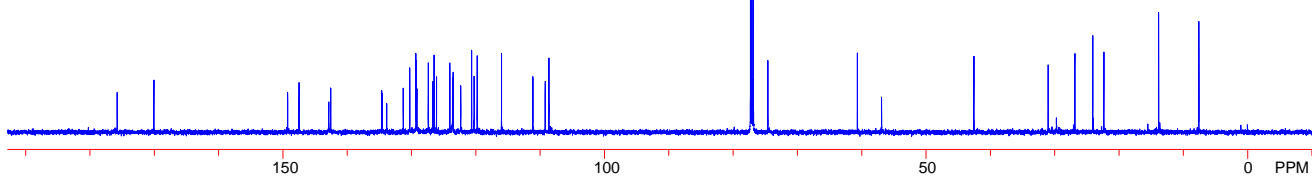

## VII. X-ray crystal structure and data of 3na

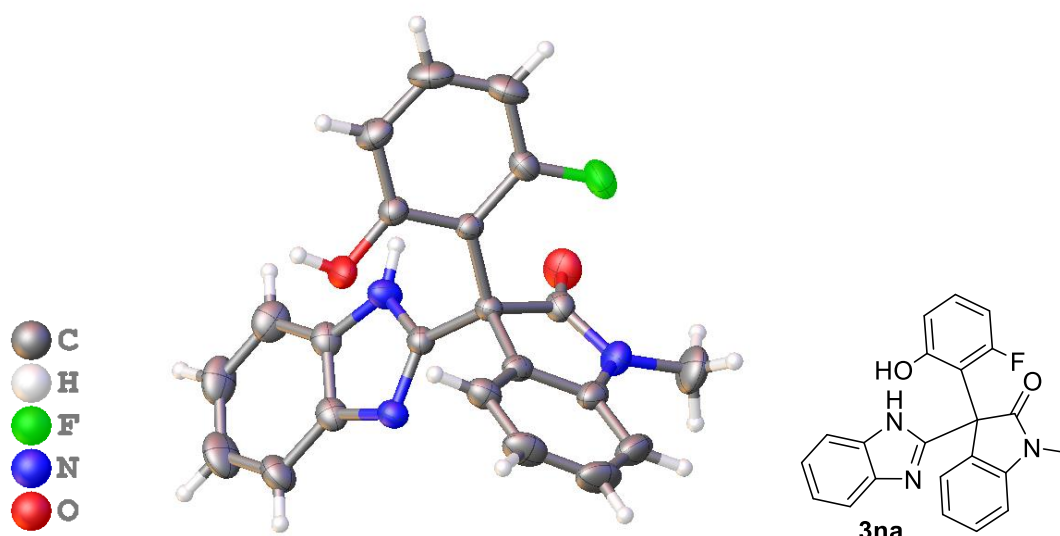

**Figure S1.** X-ray crystal structure of **3na** with 50% ellipsoid probability

**X-ray structure determination.** Single crystals suitable for X-ray diffraction were obtained by slow evaporation of the solvent from a methanol/chloroform (1:1) solution of **3na**. Crystal data collection and refinement parameters of **3na** are summarized in Table S1. Intensity data were collected at 293 K on a SuperNova Dual diffractometer using mirror-monochromated Cu K $\alpha$  radiation,  $\lambda = 1.54184$  Å. The data were corrected for decay, Lorentz, and polarization effects as well as absorption and beam corrections based on the multi-scan technique. Using Olex2, the structure was solved with the SHELXS structure solution program using Direct Methods and refined with the SHELXL refinement package using Least Squares minimisation. Nonhydrogen atoms were refined with anisotropic displacement parameters. The H-atoms were either located or calculated and subsequently treated with a riding model.

**Table S1.** Crystallographic data and structure refinement results of **3na**

|                   |                                                                     |
|-------------------|---------------------------------------------------------------------|
| Empirical formula | 2 (C <sub>22</sub> H <sub>16</sub> FN <sub>3</sub> O <sub>2</sub> ) |
| Formula weight    | 746.75                                                              |
| Temp, K           | 293.0                                                               |
| Crystal system    | orthorhombic                                                        |
| Space group       | Pna2 <sub>1</sub>                                                   |
| <i>a</i> , Å      | 18.2786(2)                                                          |
| <i>b</i> , Å      | 11.9317(2)                                                          |
| <i>c</i> , Å      | 16.8004(2)                                                          |
| $\alpha$ (°)      | 90                                                                  |



|                                           |                |
|-------------------------------------------|----------------|
| $\beta$ (°)                               | 90             |
| $\gamma$ (°)                              | 90             |
| Volume, Å <sup>3</sup>                    | 3664.08(9)     |
| Z                                         | 4              |
| $\rho_{\text{calc}}$ , g cm <sup>-3</sup> | 1.354          |
| $\lambda$ , Å                             | 1.54184        |
| $\mu$ , mm <sup>-1</sup>                  | 0.789          |
| No. of data collected                     | 13760          |
| No. of unique data                        | 5541           |
| $R_{\text{int}}$                          | 0.0289         |
| Goodness-of-fit on $F^2$                  | 1.048          |
| $R_1$ , $wR_2$ ( $I > 2\sigma(I)$ )       | 0.0475, 0.1290 |
| $R_1$ , $wR_2$ (all data)                 | 0.0494, 0.1316 |

## VIII. X-ray crystal structure and data of 3ae

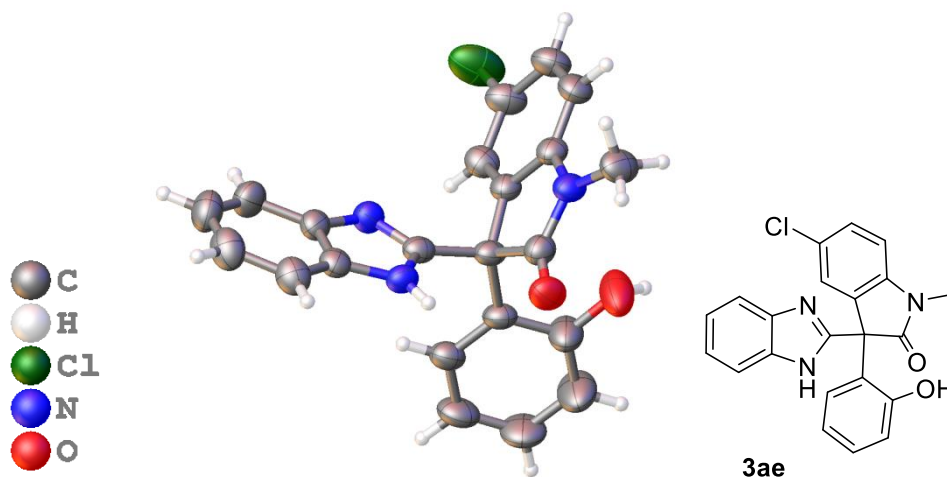

**Figure S2.** X-ray crystal structure of **3ae** with 50% ellipsoid probability

**X-ray structure determination.** Single crystals suitable for X-ray diffraction were obtained by slow evaporation of the solvent from a dimethyl sulfoxide solution of **3ae**. Crystal data collection and refinement parameters of **3ae** are summarized in Table S2. Intensity data were collected at 293 K on a SuperNova Dual diffractometer using mirror-monochromated Cu K $\alpha$  radiation,  $\lambda = 1.54184$  Å. The data were corrected for decay, Lorentz, and polarization effects as well as absorption and beam corrections based on the multi-scan technique. Using Olex2, the structure was solved with the SHELXS structure solution program using Direct Methods and refined with the SHELXL refinement package using Least Squares minimisation. Nonhydrogen atoms were refined with anisotropic displacement parameters. The H-atoms were either located or calculated and subsequently treated with a riding model.

**Table S2.** Crystallographic data and structure refinement results of **3ae**

|                   |                                                                 |
|-------------------|-----------------------------------------------------------------|
| Empirical formula | C <sub>22</sub> H <sub>16</sub> ClN <sub>3</sub> O <sub>2</sub> |
| Formula weight    | 389.83                                                          |
| Temp, K           | 293(2)                                                          |
| Crystal system    | triclinic                                                       |
| Space group       | P-1                                                             |
| <i>a</i> , Å      | 10.0502(4)                                                      |
| <i>b</i> , Å      | 11.7456(4)                                                      |
| <i>c</i> , Å      | 13.2442(5)                                                      |
| $\alpha$ (°)      | 109.804(4)                                                      |

|                                           |                |
|-------------------------------------------|----------------|
| $\beta$ (°)                               | 100.969(3)     |
| $\gamma$ (°)                              | 104.033(3)     |
| Volume, Å <sup>3</sup>                    | 1362.01(10)    |
| Z                                         | 2              |
| $\rho_{\text{calc}}$ , g cm <sup>-3</sup> | 0.951          |
| $\lambda$ , Å                             | 1.54184        |
| $\mu$ , mm <sup>-1</sup>                  | 1.374          |
| No. of data collected                     | 10916          |
| No. of unique data                        | 5159           |
| $R_{\text{int}}$                          | 0.0298         |
| Goodness-of-fit on $F^2$                  | 1.058          |
| $R_1$ , $wR_2$ ( $I > 2\sigma(I)$ )       | 0.0822, 0.2271 |
| $R_1$ , $wR_2$ (all data)                 | 0.0922, 0.2353 |

## IX. References

- (1) Y.-Y. Wang, M. Liu, L. Dong, Rh(III)-Catalyzed Multi-Site-Selective C–H Bond Functionalization: Condition-Controlled Synthesis of Diverse Fused Polycyclic Benzimidazole Derivatives. *Org. Chem. Front.* **2021**, *8*, 2487–2493.
- (2) A. C. S. Reddy, P. M. Reddy, P. Anbarasan, Diastereoselective Palladium Catalyzed Carbenylative Amination of *ortho*-Vinylanilines with 3-Diazoindolin-2-ones. *Adv. Synth. Catal.* **2020**, *362*, 801–806.
- (3) G. Kantin, D. Dar'in, M. Krasavin, Rh<sup>II</sup>-Catalyzed Cycloaddition of  $\alpha$ -Diazo Homophthalimides and Nitriles Delivers Oxazolo[5,4-*c*]isoquinolin-5(4*H*)-one Scaffold. *Eur. J. Org. Chem.* **2018**, 4857–4859.
- (4) K.-I. Fujita, Y. Takahashi, M. Owaki, K. Yamamoto, R. Yamaguchi, Synthesis of Five-, Six-, and Seven-Membered Ring Lactams by Cp\*Rh Complex-Catalyzed Oxidative *N*-Heterocyclization of Amino Alcohols. *Org. Lett.* **2004**, *6*, 2785–2788.
